# Supplementary material for: Risk of early neurodevelopmental outcomes associated with prenatal exposure to the antiepileptic drugs most commonly used during pregnancy: a French nationwide population-based cohort study
Source: PubMed Central journal article supplement — BMJ Open. 2020 Jun 7;10(6):e034829. doi: 10.1136/bmjopen-2019-034829 (PMC7282331; doi:10.1136/bmjopen-2019-034829), 2020-06-07
Supplement: bmjopen-2019-034829.draft_revisions.pdf [file bmjopen-2019-034829.draft_revisions.pdf]

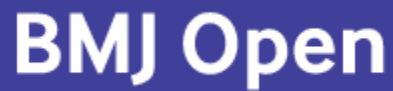

BMJ Open is committed to open peer review. As part of this commitment we make the peer review history of every article we publish publicly available.

When an article is published we post the peer reviewers' comments and the authors' responses online. We also post the versions of the paper that were used during peer review. These are the versions that the peer review comments apply to.

The versions of the paper that follow are the versions that were submitted during the peer review process. They are not the versions of record or the final published versions. They should not be cited or distributed as the published version of this manuscript.

BMJ Open is an open access journal and the full, final, typeset and author-corrected version of record of the manuscript is available on our site with no access controls, subscription charges or pay-per-view fees (<http://bmjopen.bmj.com>).

If you have any questions on BMJ Open's open peer review process please email [info.bmjopen@bmj.com](mailto:info.bmjopen@bmj.com)

# BMJ Open

## **Risk of early neurodevelopmental outcomes associated with prenatal exposure to the antiepileptic drugs most commonly used during pregnancy: a French nationwide population-based cohort study**

|                               |                                                                                                                                                                                                                                                                                                                                                                                                                                                                                                                                                                                                                                                                                                                                                                                                                                                                                                                                                                                                                                                                                                                                                                                                                                                                                                                                                                                                                                                                                                                                                                                                                                         |
|-------------------------------|-----------------------------------------------------------------------------------------------------------------------------------------------------------------------------------------------------------------------------------------------------------------------------------------------------------------------------------------------------------------------------------------------------------------------------------------------------------------------------------------------------------------------------------------------------------------------------------------------------------------------------------------------------------------------------------------------------------------------------------------------------------------------------------------------------------------------------------------------------------------------------------------------------------------------------------------------------------------------------------------------------------------------------------------------------------------------------------------------------------------------------------------------------------------------------------------------------------------------------------------------------------------------------------------------------------------------------------------------------------------------------------------------------------------------------------------------------------------------------------------------------------------------------------------------------------------------------------------------------------------------------------------|
| Journal:                      | <i>BMJ Open</i>                                                                                                                                                                                                                                                                                                                                                                                                                                                                                                                                                                                                                                                                                                                                                                                                                                                                                                                                                                                                                                                                                                                                                                                                                                                                                                                                                                                                                                                                                                                                                                                                                         |
| Manuscript ID                 | bmjopen-2019-034829                                                                                                                                                                                                                                                                                                                                                                                                                                                                                                                                                                                                                                                                                                                                                                                                                                                                                                                                                                                                                                                                                                                                                                                                                                                                                                                                                                                                                                                                                                                                                                                                                     |
| Article Type:                 | Original research                                                                                                                                                                                                                                                                                                                                                                                                                                                                                                                                                                                                                                                                                                                                                                                                                                                                                                                                                                                                                                                                                                                                                                                                                                                                                                                                                                                                                                                                                                                                                                                                                       |
| Date Submitted by the Author: | 08-Oct-2019                                                                                                                                                                                                                                                                                                                                                                                                                                                                                                                                                                                                                                                                                                                                                                                                                                                                                                                                                                                                                                                                                                                                                                                                                                                                                                                                                                                                                                                                                                                                                                                                                             |
| Complete List of Authors:     | <p>Blotière, Pierre-Olivier; French National Health Insurance (CNAM), Department of Public Health Studies; Université de Lorraine, Université Paris-Descartes, Apemac, EA 4360</p> <p>Miranda, Sara; French National Agency for Medicines and Health Products Safety, Department of Epidemiology of Health Products</p> <p>Weill, Alain; French National Health Insurance (CNAM), Department of Public Health Studies</p> <p>Mikaeloff, Yann; Assistance Publique-Hôpitaux de Paris, Hôpital Bicêtre, Unité de Rééducation Neurologique Infantile; CESP, Faculté de médecine-Université Paris-Sud, Faculté de médecine-UVSQ, INSERM, Université Paris-Saclay</p> <p>Peyre, Hugo; Laboratoire de Sciences Cognitives et Psycholinguistique, Ecole Normale Supérieure, EHESS, CNRS, PSL University; INSERM UMR 1141, Paris Diderot University; Department of Child and Adolescent Psychiatry, Robert Debré Hospital, APHP</p> <p>Ramus, Franck; Laboratoire de Sciences Cognitives et Psycholinguistique, Ecole Normale Supérieure, EHESS, CNRS, PSL University</p> <p>MAHMOUD, ZUREIK; French National Agency for Medicines and Health Products Safety, Department of Epidemiology of Health Products; Versailles Saint-Quentin-en-Yvelines University</p> <p>Coste, Joël; French National Health Insurance (CNAM), Department of Public Health Studies; Biostatistics and Epidemiology Unit, Hôtel-Dieu Hospital, Assistance Publique-Hôpitaux de Paris, and Paris Descartes University</p> <p>DRAY-SPIRA, ROSEMARY; French National Agency for Medicines and Health Products Safety, Department of Epidemiology of Health Products</p> |
| Keywords:                     | Epilepsy < NEUROLOGY, Paediatric neurology < PAEDIATRICS, Child & adolescent psychiatry < PSYCHIATRY                                                                                                                                                                                                                                                                                                                                                                                                                                                                                                                                                                                                                                                                                                                                                                                                                                                                                                                                                                                                                                                                                                                                                                                                                                                                                                                                                                                                                                                                                                                                    |
|                               |                                                                                                                                                                                                                                                                                                                                                                                                                                                                                                                                                                                                                                                                                                                                                                                                                                                                                                                                                                                                                                                                                                                                                                                                                                                                                                                                                                                                                                                                                                                                                                                                                                         |

SCHOLARONE™  
Manuscripts

1  
2  
3  
4  
5  
6  
7  
8  
9  
10  
11  
12  
13  
14  
15  
16  
17  
18  
19  
20  
21  
22  
23  
24  
25  
26  
27  
28  
29  
30  
31  
32  
33  
34  
35  
36  
37  
38  
39  
40  
41  
42  
43  
44  
45  
46  
47  
48  
49  
50  
51  
52  
53  
54  
55  
56  
57  
58  
59  
60

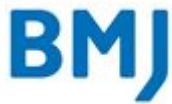

I, the Submitting Author has the right to grant and does grant on behalf of all authors of the Work (as defined in the below author licence), an exclusive licence and/or a non-exclusive licence for contributions from authors who are: i) UK Crown employees; ii) where BMJ has agreed a CC-BY licence shall apply, and/or iii) in accordance with the terms applicable for US Federal Government officers or employees acting as part of their official duties; on a worldwide, perpetual, irrevocable, royalty-free basis to BMJ Publishing Group Ltd ("BMJ") its licensees and where the relevant Journal is co-owned by BMJ to the co-owners of the Journal, to publish the Work in this journal and any other BMJ products and to exploit all rights, as set out in our [licence](#).

The Submitting Author accepts and understands that any supply made under these terms is made by BMJ to the Submitting Author unless you are acting as an employee on behalf of your employer or a postgraduate student of an affiliated institution which is paying any applicable article publishing charge ("APC") for Open Access articles. Where the Submitting Author wishes to make the Work available on an Open Access basis (and intends to pay the relevant APC), the terms of reuse of such Open Access shall be governed by a Creative Commons licence – details of these licences and which [Creative Commons](#) licence will apply to this Work are set out in our licence referred to above.

Other than as permitted in any relevant BMJ Author's Self Archiving Policies, I confirm this Work has not been accepted for publication elsewhere, is not being considered for publication elsewhere and does not duplicate material already published. I confirm all authors consent to publication of this Work and authorise the granting of this licence.

Risk of early neurodevelopmental outcomes associated with prenatal exposure to the antiepileptic drugs most commonly used during pregnancy: a French nationwide population-based cohort study

Authors: Pierre-Olivier Blotière, PhD<sup>1,2</sup>; Sara Miranda, PharmD<sup>3</sup>; Alain Weill, MD<sup>1</sup>; Yann Mikaeloff, MD, PhD<sup>4</sup>; Hugo Peyre, MD, PhD<sup>5,6,7</sup>; Franck Ramus, PhD<sup>5</sup>; Mahmoud Zureik, MD, PhD<sup>3,8</sup>; Joël Coste, MD, PhD<sup>1,9</sup>; Rosemary Dray-Spira, MD, PhD<sup>3</sup>

<sup>1</sup> Department of Public Health Studies, French National Health Insurance (CNAM), Paris, France

<sup>2</sup> Université de Lorraine, Université Paris-Descartes, Apemac, EA 4360, Nancy, France

<sup>3</sup> Department of Epidemiology of Health Products, French National Agency for Medicines and Health Products Safety, Saint-Denis, France

<sup>4</sup> Assistance Publique-Hôpitaux de Paris, Hôpital Bicêtre, Unité de Rééducation Neurologique Infantile, Bicêtre; CESP, Faculté de médecine-Université Paris-Sud, Faculté de médecine-UVSQ, INSERM, Université Paris-Saclay, 94805, Villejuif, France

<sup>5</sup> Laboratoire de Sciences Cognitives et Psycholinguistique, Ecole Normale Supérieure, EHESS, CNRS, PSL University, Paris, France

<sup>6</sup> INSERM UMR 1141, Paris Diderot University, Paris, France

<sup>7</sup> Department of Child and Adolescent Psychiatry, Robert Debré Hospital, APHP, Paris, France

<sup>8</sup> Versailles Saint-Quentin University, France

<sup>9</sup> Biostatistics and Epidemiology Unit, Hôtel-Dieu Hospital, Assistance Publique-Hôpitaux de Paris, and Paris Descartes University, Paris, France

Corresponding Author:

Pierre-Olivier Blotière

French National Health Insurance (CNAM)

50 Avenue du Professeur André Lemierre

75986 Paris Cedex 20, France.

Phone +33172601982

pierre-olivier.blotiere@assurance-maladie.fr

ORCID: 0000-0002-6857-6781

Manuscript word count: 3,344

1  
2  
3  
4  
5  
6  
7  
8  
9  
10  
11  
12  
13  
14  
15  
16  
17  
18  
19  
20  
21  
22  
23  
24  
25  
26  
27  
28  
29  
30  
31  
32  
33  
34  
35  
36  
37  
38  
39  
40  
41  
42  
43  
44  
45  
46  
47  
48  
49  
50  
51  
52  
53  
54  
55  
56  
57  
58  
59  
60

Abstract

Objective: To assess the association between prenatal exposure to monotherapy with the antiepileptic drugs (AEDs) most commonly used during pregnancy and the risk of various neurodevelopmental outcomes compared to lamotrigine.

Methods: This population-based cohort study, based on the French national health care databases, included children born alive between 2011 and 2014 and prenatally exposed to AED monotherapy. Women were considered to be exposed to an AED during the 30 days following each dispensing. The reference group comprised children prenatally exposed to lamotrigine. Outcomes included neurodevelopmental disorders (NDD), defined with ICD-10 codes F70-F98, – pervasive developmental disorders (PDD, F84) and mental retardation (MR, F70-F79) were studied separately – and visits to speech therapists. Children were followed until outcome, loss to follow-up, death or 31 December 2016. We performed inverse probability of treatment weighting analyses using the propensity score, which included maternal and infant characteristics. Hazard ratios (HRs) were calculated using Cox models.

Results: The cohort comprised 9,034 children, 2,916 of which were exposed to lamotrigine, 1,627 to pregabalin, 1,246 to clonazepam, 991 to valproic acid (VPA), 621 to levetiracetam, 502 to carbamazepine, 477 to topiramate, 378 to gabapentin and 143 to oxcarbazepine. None of these AEDs, except VPA, were associated with an increased risk of any of the four neurodevelopmental outcomes investigated. Exposure to VPA was associated with increased risks of NDDs (HR=2.7[1.8-4.0]), PDD (HR=4.4[2.1-9.3]), MR (HR=3.1[1.5-6.2]) and visits to speech therapists (HR=1.5[1.1-1.9]), with a dose-response relationship.

Conclusions: No increased risk of any of the neurodevelopmental outcomes investigated in this study was observed with prenatal exposure to levetiracetam, pregabalin, oxcarbazepine, topiramate, gabapentin, clonazepam or carbamazepine, compared to lamotrigine. However,

1  
2  
3 this study corroborates the well-known association between maternal use of VPA during  
4 pregnancy and the risk of neurodevelopmental disorders in the offspring. Longer follow-up is  
5 necessary to confirm these findings.  
6  
7  
8  
9

10  
11  
12  
13  
14 Keywords: antiepileptic drugs; pregnancy; neurodevelopmental disorders; health care  
15  
16 databases; France  
17  
18  
19  
20  
21

## 22 Strengths and limitations of this study

23  
24  
25 This nationwide cohort study based on the French health care databases is the largest study to  
26 date to assess the association between AED exposure during pregnancy and  
27 neurodevelopmental outcomes in the offspring.  
28  
29  
30  
31

32  
33 This study investigated a wide range of AEDs, including some drugs for which little or no  
34 information is available in the literature.  
35  
36  
37

38  
39 Although residual confounding by unmeasured covariates cannot be excluded, the choice of  
40 lamotrigine as the reference group and the sensitivity analysis restricted to women considered  
41 to be treated for epilepsy should mitigate confounding.  
42  
43  
44

45  
46 The maximum length of follow-up was 6 years, allowing only early diagnoses of  
47 neurodevelopmental disorders to be identified.  
48  
49  
50  
51  
52  
53  
54  
55  
56  
57  
58  
59  
60

1  
2  
3  
4  
5  
6  
7  
8  
9  
10  
11  
12  
13  
14  
15  
16  
17  
18  
19  
20  
21  
22  
23  
24  
25  
26  
27  
28  
29  
30  
31  
32  
33  
34  
35  
36  
37  
38  
39  
40  
41  
42  
43  
44  
45  
46  
47  
48  
49  
50  
51  
52  
53  
54  
55  
56  
57  
58  
59  
60

**INTRODUCTION**

Antiepileptic drugs (AEDs) are commonly prescribed during pregnancy to treat epilepsy and various other conditions, such as neuropathic pain syndromes, psychiatric disorders and chronic migraine[1]: between 0.4 and 0.7% of women are exposed to AEDs during pregnancy in Europe,[2,3] while this prevalence is as high as 2% in the US.[4]

Some of these AEDs are known to be teratogens.[5] Of all AEDs, prenatal exposure to valproic acid has been most clearly associated with poor neurodevelopmental outcomes,[6] which led the US Food and Drug Administration to issue a warning in 2011[7] and stringent guidance in 2013 for clinicians prescribing valproic acid to pregnant women or women of childbearing potential.[8] The European Medicines Agency also strengthened warnings on the use of valproate-containing medicines in women and girls in 2014[9] and issued a ban in 2018 on the use of such medicines during pregnancy for migraine or bipolar disorder, and for epilepsy except when no other effective treatment is available.[10]

Lamotrigine has generally been associated with favorable neurodevelopmental outcomes.[6] Discordant but mainly reassuring data have been published for carbamazepine, while evidence for levetiracetam and topiramate remains limited and almost no information is available concerning the other AEDs, particularly clonazepam, oxcarbazepine, gabapentin and pregabalin.[6] Furthermore, most of the studies conducted to date have been based on small sample sizes and may be prone to selection bias.

We therefore conducted a large-scale nationwide cohort study using the French health care databases to assess various early neurodevelopmental outcomes among children prenatally exposed to monotherapy with individual AEDs compared to lamotrigine-exposed children.

## METHODS

### Study design and data sources

The French national health insurance database (SNIIRAM) and the French hospital discharge database (PMSI) linked by a unique patient identifier were used to conduct this nationwide population-based cohort study.[11]

The DCIR database contains all individualized and anonymous health care claims reimbursed by French National Health Insurance, in particular all dispensed drugs and medical procedures in the outpatient setting. The DCIR database also collects patient data such as age, gender, vital status and eligibility for complementary universal health insurance (CMU-C), which provides free access to health care for low-income people.[12] Eligibility for 100% health insurance coverage for serious and costly long-term diseases (LTD) is also recorded in the DCIR database.

The PMSI database provides detailed medical information on all admissions to public and private hospitals in France, including primary, related and associated discharge diagnoses, medical procedures and data related to pregnancy such as gestational ages and birth weights.

Drugs are coded according to the Anatomical Therapeutic Chemical (ATC) classification and medical procedures are coded according to the French medical classification of clinical procedures (CCAM). LTD and hospital discharge diagnoses are coded according to the International Classification of Diseases, 10th Revision (ICD-10).

This linkage has previously been used to conduct epidemiological studies in pregnancy research.[3,13–15]

**Study population**

All live births between January 2011 and December 2014 were eligible for inclusion. These live births were identified by using a published algorithm based on discharge diagnoses and medical procedures indicative of completion of pregnancy.[3]

The mother had to be enrolled in the national health insurance general scheme (75% of the French population), during the penultimate year before pregnancy. Pregnancies that could not be linked to neonatal data and twin pregnancies were excluded, as well as pregnancies for which the child had no valid identifier allowing follow-up and pregnancies for which gestational ages or birth weights were not available. Children with a hospital discharge diagnosis of brain malformation documented at birth were also excluded (see supplementary Table 1 for ICD-10 codes). For each woman, only the first birth occurring during the study period was considered.

Finally, only pregnancies exposed to AED monotherapy were included in the study population.

These exclusion criteria are reported in the study population flowchart (Figure 1).

**Patient and Public Involvement**

Patients or the public were not involved in the design and the conduct of the study.

**Exposure**

All AEDs were studied (supplementary Table 2). Women were considered to be exposed during the 30 days following dispensing of an AED, as AED prescriptions are dispensed with a 30-day supply in France. Women were therefore exposed during pregnancy when an AED had been dispensed between 30 days before the beginning of pregnancy and the end of

pregnancy. Monotherapy was defined as the absence of any other AED dispensed during the same period. Results related to AEDs rarely used as monotherapy during pregnancy (< 100 exposed pregnancies) were not reported. The reference group included pregnant women exposed to lamotrigine monotherapy for the following reason: active-comparator designs minimize confounding by indication compared to the use of an unexposed control group[16] ; lamotrigine is the most commonly used AED in France for the treatment of epilepsy ; prenatal exposure to lamotrigine has been mostly shown to be associated with favorable neurodevelopmental outcomes ; comparing all individual AEDs to lamotrigine addresses a clinically relevant question: which is the safest AED?

Mean daily doses were calculated by dividing cumulative doses by the number of days covered. Cumulative doses were assessed by equally distributing the dose of AED dispensed over the 30 days following dispensing and then by adding these daily doses overlapping with the pregnancy period. The number of days covered was defined as the sum of the 30-day periods of exposure corresponding to each refill minus the number of days of overlap between two consecutive refills. Only the days overlapping with the pregnancy period were taken into account.

## Outcomes

Four outcomes were considered, based on the literature but also on their availability in the French health care databases. The primary outcomes were hospitalization or LTD for neurodevelopmental disorders (ICD-10 diagnosis codes F70 to F98), but also for two specific subcategories: pervasive developmental disorders (F84) and mental retardation (F70-F79). The secondary outcome was “visits to a speech therapist”, as a proxy for communication-related disorders.

## Follow-up

Children were followed from birth until any of the predefined outcomes, loss to follow-up (more than one year with no reimbursement), death from any cause or end of the study period defined as the 31<sup>st</sup> December 2016, whichever came first.

**Covariates**

Potential confounders related to the mother and considered in this study included sociodemographic covariates (maternal age at birth and eligibility for CMU-C), as well as comedications and comorbidities. Comedications included (1) pre-conception folic acid supplementation, defined as at least one dispensing between one month before pregnancy and 3 months after the start of pregnancy, (2) exposure to selective serotonin reuptake inhibitors (SSRIs) during pregnancy, (3) exposure to antipsychotics in the year before pregnancy, (4) a proxy for severity of mental disorders (the number of 5<sup>th</sup> level ATC classes of psychiatric medications dispensed in the year before pregnancy). History of mental and behavioral disorders not related to alcohol or smoking, which was identified by using hospital discharge and LTD diagnoses, was also considered to be potential confounder. Alcohol intake and smoking were not directly available in the databases and proxies were calculated using modified versions of previously published algorithms.[17] These proxies were constructed on the basis of hospital discharge diagnoses, LTD diagnoses and the child’s hospital discharge diagnoses at birth. We also used specific drug reimbursements for alcohol intake and nicotine replacement therapy reimbursements for smoking. Potential confounders related to the child and considered in this study were gender, gestational age and birth weight.

All drugs and ICD-10 codes related to hospital discharge and LTD diagnoses used to define covariates are presented in supplementary Table 1.

**Statistical analyses**

Baseline covariates were compared between pregnancies exposed to each AED studied and lamotrigine-exposed pregnancies using  $\chi^2$  tests. Number of events, crude event rates and crude incidence rate ratios (IRRs) were calculated. Potential confounders were controlled for by performing inverse probability of treatment weighting (IPTW) analyses using the propensity score. These analyses were conducted separately according to the type of AED. Propensity scores were determined by using logistic regression models including the covariates listed above, with maternal age as a categorical variable ( $\leq 25$  years, [25 - 30[, [30 - 35[ and  $\geq 35$ ). Weights were trimmed at the 0.1 and 99.9 percentiles. Absolute standardized differences were calculated to assess the balance in baseline covariates before and after weighting. Groups were considered to be balanced when standardized differences were less than 0.1.[18] Cox models with robust sandwich estimates were used to calculate hazard ratios (HR) and their 95% confidence intervals.

As AEDs can be prescribed for a wide range of medical conditions other than epilepsy, a first sensitivity analysis in which the study population was restricted to women considered to be treated for epilepsy (see supplementary Table 1 for definition) was conducted. In this sensitivity analysis, HRs were further adjusted for hospitalization (primary and related diagnoses only) for epilepsy during pregnancy. A second sensitivity analysis, requiring at least one dispensing during pregnancy to consider a woman to be exposed, was also conducted to account for possible misclassification of exposure at the beginning of pregnancy. In a third sensitivity analysis, two other propensity scores were calculated: one excluding proxies for alcohol intake and smoking and another one excluding gestational age and birth weight.

Data extraction and statistical analysis were performed by using SAS Enterprise Guide 4.3 software (SAS Institute, Inc., Cary, NC). Graphics were performed by using R 3.5 statistical software.

RESULTS

Main analysis

From a total of 1,721,990 births satisfying all inclusion and exclusion criteria, 9,034 children were prenatally exposed to AED monotherapy (Figure 1), 32 (0.4%) of whom were censored at death and 1,224 (13.5%) were lost to follow-up. The median follow-up was 3.7 years (interquartile range, 2.7-4.7 years). Of these 9,034 children, 2,916 were exposed to lamotrigine, 1,627 were exposed to pregabalin, 1,246 were exposed to clonazepam, 991 were exposed to valproic acid, 621 were exposed to levetiracetam, 502 were exposed to carbamazepine, 477 were exposed to topiramate, 378 were exposed to gabapentin and 143 were exposed to oxcarbazepine (Table 1). A total of 133 children were exposed to another AED monotherapy, including phenobarbital (N=84), phenytoin (N=13), lacosamide (N=9), zonisamide (N=8), ethosuximide (N=7) and vigabatrin (N=6). The median follow-up ranged from 3.3 to 4.0 years across all AEDs except clonazepam (4.8 years).

Table 1 also reports baseline patient characteristics according to the type of AED prior to IPTW, showing some significant differences between the various AEDs studied and lamotrigine. Before weighting, across all variables included in the propensity score and all AEDs studied, the absolute standardized differences ranged from 0.00 to 0.94. After weighting, all standardized differences were less than 0.1, indicating a good balance between treatment groups (Figure 2).

Table 2 presents the number of events, crude event rates, IRRs and adjusted HRs for the four outcomes and each of the AEDs studied. Compared to prenatal exposure to lamotrigine, prenatal exposures to all of the AEDs studied, excluding valproic acid, were not found to be associated with an increased risk of any of the four outcomes investigated. By contrast,

valproic acid was associated with an increased risk of visits to a speech therapist (HR=1.5[1.1-1.9]) and neurodevelopmental disorders (HR=2.7[1.8-4.0]), particularly pervasive developmental disorders (HR=4.4[2.1-9.3]) and mental retardation (HR=3.1[1.5-6.2]).

### Sensitivity analyses

In the first sensitivity analysis restricting the study population to women considered to be treated for epilepsy, only results related to carbamazepine, levetiracetam and valproic acid are reported. The number of women considered to be treated for epilepsy and exposed to monotherapy with each of the other AEDs was less than 100. Baseline patient characteristics and absolute standardized differences are available in supplementary Table 3 and supplementary Figure 1, respectively. Prenatal exposure to levetiracetam was not found to be associated with any of the four outcomes investigated and prenatal exposure to valproic acid was associated with all four outcomes, which is in line with the results of the main analysis. Results were different from the main analysis for the association between carbamazepine and the risk of visits to a speech therapist (HR=0.2[0.1-0.7]) (Table 3).

The results of the second (see supplementary Figure 2 for standardized differences) and third sensitivity analyses were comparable to those of the main analysis (see supplementary Table 4 and supplementary Table 5, respectively).

### Dose

Baseline patient characteristics according to the dose of valproic acid dispensed during pregnancy are reported in supplementary Table 6. A dose-response relationship was observed for the association between prenatal exposure to valproic acid and the risks of visits to a speech therapist (< 700 mg: HR=0.6[0.3-1.0], [700-1500 mg]: HR=1.6[1.2-2.1], ≥ 1500 mg: HR=2.6[1.7-4.0]) and neurodevelopmental disorders (< 700 mg: HR=1.3[0.6-2.8], [700-1500

1  
2  
3  
4  
5  
6  
7  
8  
9  
10  
11  
12  
13  
14  
15  
16  
17  
18  
19  
20  
21  
22  
23  
24  
25  
26  
27  
28  
29  
30  
31  
32  
33  
34  
35  
36  
37  
38  
39  
40  
41  
42  
43  
44  
45  
46  
47  
48  
49  
50  
51  
52  
53  
54  
55  
56  
57  
58  
59  
60

mg[: HR=2.1[1.3-3.5],  $\geq 1500$  mg: HR=7.0[4.3-11.5]), including pervasive developmental disorders ( $< 700$  mg: HR=2.2[0.5-8.5], [700-1500 mg[: HR=2.7[1.0-7.1],  $\geq 1500$  mg: HR=14.7[6.2-34.7]). The highest HR of mental retardation was also observed for the highest mean daily dose ( $\geq 1500$  mg: HR=7.3[3.0-17.7]). Comparable results were observed when the study population was limited to women considered to be treated for epilepsy (Table 4).

**DISCUSSION**

**Main Findings**

In this nationwide observational study based on the French health care databases, prenatal exposures to levetiracetam, pregabalin, oxcarbazepine, topiramate, gabapentin, clonazepam and carbamazepine were not associated with an increased risk of any of the early neurodevelopmental outcomes investigated compared to lamotrigine. The decreased risk of visits to a speech therapist observed with carbamazepine when the population was restricted to women with epilepsy may be a chance finding. This association is based on only 4 children and has never been observed in psychometric studies with detailed language assessments. Prenatal exposure to valproic acid was found to be associated with increased risks of all neurodevelopmental outcomes investigated compared to lamotrigine, ranging from pervasive mental disorders to possible communication-related disorders. A dose-response relationship was observed for most of these outcomes.

**Comparison with Previous Studies**

Prenatal exposure to lamotrigine has been mostly shown not to be associated with poorer neurodevelopmental outcomes, although limited data are available, with no dose-response relationship.[6] Only three studies have shown that prenatal exposure to lamotrigine was

associated with impaired specific cognitive skills[19,20] and parental concerns about autistic traits and sentence skills.[21]

The results of the present study concerning valproic acid, carbamazepine, levetiracetam and topiramate are consistent with those of previous studies. Prenatal exposure to valproic acid has been associated with poorer cognitive outcomes[19,22–24] and particularly poorer executive functions and memory abilities[23] compared to lamotrigine. Children prenatally exposed to valproic acid also show impaired adaptive behavior[25,26] and school performance[27] compared to lamotrigine-exposed children. Impaired language skills[28] and autism spectrum disorder have been reported to be more frequent among children exposed to valproic acid than among unexposed children.[29,30] A dose-response relationship has also been observed for most of these outcomes.[19,22,23,25,26,28]

Few studies have directly compared prenatal exposure to carbamazepine *versus* lamotrigine and these studies did not find any differences in terms of cognitive development[19,31] and adaptive behavior.[26] Data concerning levetiracetam and topiramate are more limited and no direct comparison with lamotrigine has been published. No increased risk of neurodevelopmental outcomes was found among levetiracetam-exposed children compared to unexposed children[32–34] and, although prenatal exposure to topiramate was associated with poorer neurodevelopmental outcomes in one study,[35] this association was not confirmed by a larger study.[33] Little or no information is available concerning the other AEDs, particularly clonazepam, oxcarbazepine, gabapentin and pregabalin.[29,33,36]

## Strengths

This nationwide cohort study based on the French health care database is the largest study to date to assess the association between AED exposure during pregnancy and neurodevelopmental outcomes in the offspring. This study investigated a wide range of

1  
2  
3  
4  
5  
6  
7  
8  
9  
10  
11  
12  
13  
14  
15  
16  
17  
18  
19  
20  
21  
22  
23  
24  
25  
26  
27  
28  
29  
30  
31  
32  
33  
34  
35  
36  
37  
38  
39  
40  
41  
42  
43  
44  
45  
46  
47  
48  
49  
50  
51  
52  
53  
54  
55  
56  
57  
58  
59  
60

AEDs, including some drugs for which little or no information is available in the literature. The strengths of this study also include the use of propensity score methods to mitigate confounding, as well as the advantages of the French health care databases, such as the independence between ascertainment of medication and outcomes, the absence of recall bias, and the possibility to study the dose-response relationship, which is a key concept in terms of teratogenicity.[33]

**Limitations**

Exposure misclassification constitutes a first limitation. Exposure assessment was based on pharmacy claims, which do not indicate whether the medication is actually taken. Exposure misclassification is more likely for AED classes that are often discontinued before conception.[37] However, the results of the sensitivity analysis regarding exposure measurement suggest that this bias is likely minimal.

Although we used an active-comparator design, residual confounding by unmeasured or insufficiently well measured covariates cannot be excluded. For instance, maternal education and IQ were not available in the databases. Data related to the father could not be linked to the child, not allowing any adjustment for paternal characteristics. Lifestyle factors such as alcohol intake and smoking could also not be exhaustively assessed.

As some AEDs can be prescribed to treat conditions other than epilepsy, the analyses were replicated in a population restricted to women considered to be treated for epilepsy, providing comparable results to those of the main analysis. However, the indication for which an AED is prescribed was not directly available in the databases. We therefore used LTD diagnoses, hospital diagnoses and specific drug reimbursements to identify women with epilepsy. Some studies,[34,38,39] unlike other studies,[19,22–24] have also reported an association between the severity of maternal epilepsy, particularly seizure type and frequency, and poorer

developmental outcomes in the child. As this confounder was not available in the databases, we considered at least one admission to hospital for epilepsy during pregnancy to be a proxy for epilepsy severity. Similar results were observed whether or not this proxy was included in the propensity score.

Outcome misclassification also cannot be ruled out, as the diagnosis codes used to identify neurodevelopmental outcomes have not been externally validated. However, the PMSI database is used for planning and funding purposes and is subject to coding quality control, and LTD registration, which is requested by the patient's general practitioner, must be validated by a medical consultant of the beneficiary's health insurance scheme. In addition, as hospital discharge and LTD diagnoses were used to define outcomes, children not reaching diagnostic thresholds but still having some evidence of impairment were not considered to have experienced the outcomes of interest.[40] Moreover, some of the outcomes studied may not have been exhaustively assessed, as data related to a large share of medical and social welfare services are not available in the French health care databases. Results related to visits to a speech therapist must also be interpreted with caution, as a visit to a speech therapist does not necessarily imply pathology. Speech therapists can also be consulted for various medical reasons, and access to speech therapists is associated with socioeconomic status.[41] Further, because the study outcomes were limited to three subtypes of neurodevelopmental disorders (pervasive developmental disorders, mental retardation and visits to a speech therapist as a proxy for communication-related disorders), no conclusion can be drawn concerning all of the other subtypes of neurodevelopmental disorders.

The short follow-up period constitutes another limitation: the median and maximum lengths of follow-up were 3.7 and 6 years, respectively. In particular, a diagnosis of autism spectrum disorders is considered to be stable at age 2[42] and is made at an average age of 3 years and 5 months in France,[43] but speech therapy is more frequent among school-aged children.

1  
2  
3  
4  
5  
6  
7  
8  
9  
10  
11  
12  
13  
14  
15  
16  
17  
18  
19  
20  
21  
22  
23  
24  
25  
26  
27  
28  
29  
30  
31  
32  
33  
34  
35  
36  
37  
38  
39  
40  
41  
42  
43  
44  
45  
46  
47  
48  
49  
50  
51  
52  
53  
54  
55  
56  
57  
58  
59  
60

Therefore, only early diagnoses, probably corresponding to more severe disorders, were identified. This is especially true for mental retardation: although severe and profound mental retardation can be diagnosed before 3 years old, moderate mental retardation cannot be diagnosed before 4 or 5 years old.[44] Further assessment of children at older developmental stages would be useful to study a broader range of neurodevelopmental disorders. Except clonazepam for which French health authorities took measures to limit off-label use in November 2011,[45] lengths of follow-up were quite comparable across all AEDs. Children exposed to second-generation AEDs had only slightly shorter follow-ups than children exposed to first-generation AEDs, which should not have influenced the results of this study.

**CONCLUSION**

Despite the limitations inherent to health care claims databases, this study, based on 9,034 exposed children, confirms that valproic acid is associated with an increased risk of various neurodevelopmental outcomes compared to lamotrigine, with a dose-response relationship, while no association was observed for the other AEDs including carbamazepine, levetiracetam or topiramate. However, this study needs to be replicated with a longer follow-up period.

Acknowledgements: The authors thank François Alla and Géric Maura for assistance in revising the manuscript for intellectual content and Anthony Saul, medical translator, for assistance in editing the manuscript.

Parts of this work have been previously presented at the 34<sup>th</sup> International Conference on Pharmacoepidemiology and Therapeutic Risk Management in Prague, Czech Republic (August 2018).

Contributors: POB, SM, AW, MZ, JC and RDS contributed to the conception and design of the study. POB and SM contributed to the acquisition of data. POB conducted the statistical analyses. POB, SM, AW, YM, HP, FR, MZ, JC and RDS contributed to the interpretation of data. POB drafted the manuscript. AW, YM, HP, FR, MZ, JC and RDS revised the manuscript for important intellectual content. AW, MZ, JC and RDS coordinated and supervised the study.

Funding: POB and AW are employees of the French National Health Insurance (CNAM). SM, MZ, and RDS are employees of the French National Agency for Medicines and Health Products Safety (ANSM), YM and JC work at Assistance Publique-Hôpitaux de Paris. None of these authors received any funding. All work by HP and FR is supported by Agence Nationale de la Recherche (grants ANR-17-EURE-0017 and ANR-10-IDEX-0001-02).

Competing interests: The authors report no disclosures relevant to the manuscript.

Patient consent for publication: Not required.

Ethics approval: This observational cohort study based on the French health care databases was approved by the French Data Protection Agency (CNIL, approval ID: DE-2015-165) and did not require patient consents or ethics approval.

1  
2  
3  
4  
5  
6  
7  
8  
9  
10  
11  
12  
13  
14  
15  
16  
17  
18  
19  
20  
21  
22  
23  
24  
25  
26  
27  
28  
29  
30  
31  
32  
33  
34  
35  
36  
37  
38  
39  
40  
41  
42  
43  
44  
45  
46  
47  
48  
49  
50  
51  
52  
53  
54  
55  
56  
57  
58  
59  
60

Data sharing statement: Permanent access to the French health care databases is automatically granted to certain government agencies, public institutions and public service authorities.

Temporary access for studies and research is possible upon request from the national health data institute (INDS).

Licence statement: I, the Submitting Author has the right to grant and does grant on behalf of all authors of the Work (as defined in the below author licence), an exclusive licence and/or a non-exclusive licence for contributions from authors who are: i) UK Crown employees; ii) where BMJ has agreed a CC-BY licence shall apply, and/or iii) in accordance with the terms applicable for US Federal Government officers or employees acting as part of their official duties; on a worldwide, perpetual, irrevocable, royalty-free basis to BMJ Publishing Group Ltd (“BMJ”) its licensees and where the relevant Journal is co-owned by BMJ to the co-owners of the Journal, to publish the Work in Journal of Neurology, Neurosurgery, and Psychiatry and any other BMJ products and to exploit all rights, as set out in our licence.

The Submitting Author accepts and understands that any supply made under these terms is made by BMJ to the Submitting Author unless you are acting as an employee on behalf of your employer or a postgraduate student of an affiliated institution which is paying any applicable article publishing charge (“APC”) for Open Access articles. Where the Submitting Author wishes to make the Work available on an Open Access basis (and intends to pay the relevant APC), the terms of reuse of such Open Access shall be governed by a Creative Commons licence – details of these licences and which Creative Commons licence will apply to this Work are set out in our licence referred to above.

## REFERENCES

- 1 Spina E, Perugi G. Antiepileptic drugs: indications other than epilepsy. *Epileptic Disord Int Epilepsy J Videotape* 2004;**6**:57–75.
- 2 Charlton R, Garne E, Wang H, *et al*. Antiepileptic drug prescribing before, during and after pregnancy: a study in seven European regions. *Pharmacoepidemiol Drug Saf* 2015;**24**:1144–54. doi:10.1002/pds.3847
- 3 Blotière P-O, Weill A, Dalichampt M, *et al*. Development of an algorithm to identify pregnancy episodes and related outcomes in health care claims databases: An application to antiepileptic drug use in 4.9 million pregnant women in France. *Pharmacoepidemiol Drug Saf* 2018;**27**:763–70. doi:10.1002/pds.4556
- 4 Bobo WV, Davis RL, Toh S, *et al*. Trends in the use of antiepileptic drugs among pregnant women in the US, 2001–2007: a medication exposure in pregnancy risk evaluation program study. *Paediatr Perinat Epidemiol* 2012;**26**:578–88. doi:10.1111/ppe.12004
- 5 Hill DS, Wlodarczyk BJ, Palacios AM, *et al*. Teratogenic effects of antiepileptic drugs. *Expert Rev Neurother* 2010;**10**:943–59. doi:10.1586/ern.10.57
- 6 Bromley RL, Baker GA. Fetal antiepileptic drug exposure and cognitive outcomes. *Seizure* 2017;**44**:225–31. doi:10.1016/j.seizure.2016.10.006
- 7 US Food and Drug administration. FDA Drug Safety Communication: Children born to mothers who took Valproate products while pregnant may have impaired cognitive development. 2011. <https://www.fda.gov/Drugs/DrugSafety/ucm261543.htm> (accessed 14 Jan 2019).
- 8 US Food and Drug administration. FDA Drug Safety Communication: Valproate Anti-seizure Products Contraindicated for Migraine Prevention in Pregnant Women due to Decreased IQ Scores in Exposed Children. 2013. <https://www.fda.gov/drugs/drugsafety/ucm350684.htm> (accessed 6 Aug 2018).
- 9 European Medicines Agency. CMDh agrees to strengthen warnings on the use of valproate medicines in women and girls. 2014. <https://www.ema.europa.eu/en/medicines/human/referrals/valproate-related-substances> (accessed 14 Jan 2019).
- 10 European Medicines Agency. New measures to avoid valproate exposure in pregnancy endorsed. 2018. <https://www.ema.europa.eu/en/medicines/human/referrals/valproate-related-substances-0> (accessed 14 Jan 2019).
- 11 Tuppin P, Rudant J, Constantinou P, *et al*. Value of a national administrative database to guide public decisions: From the système national d'information interrégimes de l'Assurance Maladie (SNIIRAM) to the système national des données de santé (SNDS) in France. *Rev Epidemiol Sante Publique* 2017;**65 Suppl 4**:S149–67. doi:10.1016/j.respe.2017.05.004
- 12 Fonds CMU-C. Présentation de la CMU-C. <https://www.cmu.fr/cmu-complementaire.php> (accessed 12 Jul 2018).

- 13 Raguideau F, Mezzarobba M, Zureik M, *et al.* Compliance with pregnancy prevention plan recommendations in 8672 French women of childbearing potential exposed to acitretin. *Pharmacoepidemiol Drug Saf* 2015;**24**:526–33. doi:10.1002/pds.3763
- 14 Billionnet C, Mitanchez D, Weill A, *et al.* Gestational diabetes and adverse perinatal outcomes from 716,152 births in France in 2012. *Diabetologia* 2017;**60**:636–44. doi:10.1007/s00125-017-4206-6
- 15 Blotière P-O, Raguideau F, Weill A, *et al.* Risks of 23 specific malformations associated with prenatal exposure to ten antiepileptic drugs. *Neurology*. 2019.
- 16 Lund JL, Richardson DB, Stürmer T. The active comparator, new user study design in pharmacoepidemiology: historical foundations and contemporary application. *Curr Epidemiol Rep* 2015;**2**:221–8. doi:10.1007/s40471-015-0053-5
- 17 Maura G, Billionnet C, Alla F, *et al.* Comparison of Treatment Persistence with Dabigatran or Rivaroxaban versus Vitamin K Antagonist Oral Anticoagulants in Atrial Fibrillation Patients: A Competing Risk Analysis in the French National Health Care Databases. *Pharmacotherapy* 2018;**38**:6–18. doi:10.1002/phar.2046
- 18 Austin PC, Stuart EA. Moving towards best practice when using inverse probability of treatment weighting (IPTW) using the propensity score to estimate causal treatment effects in observational studies. *Stat Med* 2015;**34**:3661–79. doi:10.1002/sim.6607
- 19 Bromley RL, Mawer G, Love J, *et al.* Early cognitive development in children born to women with epilepsy: a prospective report. *Epilepsia* 2010;**51**:2058–65. doi:10.1111/j.1528-1167.2010.02668.x
- 20 Rihtman T, Parush S, Ornoy A. Developmental outcomes at preschool age after fetal exposure to valproic acid and lamotrigine: cognitive, motor, sensory and behavioral function. *Reprod Toxicol Elmsford N* 2013;**41**:115–25. doi:10.1016/j.reprotox.2013.06.001
- 21 Veiby G, Daltveit AK, Schjølberg S, *et al.* Exposure to antiepileptic drugs in utero and child development: a prospective population-based study. *Epilepsia* 2013;**54**:1462–72. doi:10.1111/epi.12226
- 22 Baker GA, Bromley RL, Briggs M, *et al.* IQ at 6 years after in utero exposure to antiepileptic drugs: a controlled cohort study. *Neurology* 2015;**84**:382–90. doi:10.1212/WNL.0000000000001182
- 23 Meador KJ, Baker GA, Browning N, *et al.* Fetal antiepileptic drug exposure and cognitive outcomes at age 6 years (NEAD study): a prospective observational study. *Lancet Neurol* 2013;**12**:244–52. doi:10.1016/S1474-4422(12)70323-X
- 24 Meador KJ, Baker GA, Browning N, *et al.* Cognitive function at 3 years of age after fetal exposure to antiepileptic drugs. *N Engl J Med* 2009;**360**:1597–605. doi:10.1056/NEJMoa0803531
- 25 Cohen MJ, Meador KJ, Browning N, *et al.* Fetal antiepileptic drug exposure: Adaptive and emotional/behavioral functioning at age 6 years. *Epilepsy Behav EB* 2013;**29**:308–15. doi:10.1016/j.yebeh.2013.08.001
- 26 Deshmukh U, Adams J, Macklin EA, *et al.* Behavioral outcomes in children exposed prenatally to lamotrigine, valproate, or carbamazepine. *Neurotoxicol Teratol* 2016;**54**:5–14. doi:10.1016/j.ntt.2016.01.001

- 27 Elkjær LS, Bech BH, Sun Y, *et al.* Association Between Prenatal Valproate Exposure and Performance on Standardized Language and Mathematics Tests in School-aged Children. *JAMA Neurol* Published Online First: 19 February 2018. doi:10.1001/jamaneurol.2017.5035
- 28 Nadebaum C, Anderson VA, Vajda F, *et al.* Language skills of school-aged children prenatally exposed to antiepileptic drugs. *Neurology* 2011;**76**:719–26. doi:10.1212/WNL.0b013e31820d62c7
- 29 Christensen J, Grønberg TK, Sørensen MJ, *et al.* Prenatal Valproate Exposure and Risk of Autism Spectrum Disorders and Childhood Autism. *JAMA* 2013;**309**:1696–703. doi:10.1001/jama.2013.2270
- 30 Bromley RL, Mawer GE, Briggs M, *et al.* The prevalence of neurodevelopmental disorders in children prenatally exposed to antiepileptic drugs. *J Neurol Neurosurg Psychiatry* 2013;**84**:637–43. doi:10.1136/jnnp-2012-304270
- 31 Bromley R, Weston J, Adab N, *et al.* Treatment for epilepsy in pregnancy: neurodevelopmental outcomes in the child. *Cochrane Database Syst Rev* 2014;:CD010236. doi:10.1002/14651858.CD010236.pub2
- 32 Shallcross R, Bromley RL, Irwin B, *et al.* Child development following in utero exposure: levetiracetam vs sodium valproate. *Neurology* 2011;**76**:383–9. doi:10.1212/WNL.0b013e3182088297
- 33 Bromley RL, Calderbank R, Cheyne CP, *et al.* Cognition in school-age children exposed to levetiracetam, topiramate, or sodium valproate. *Neurology* 2016;**87**:1943–53. doi:10.1212/WNL.00000000000003157
- 34 Shallcross R, Bromley RL, Cheyne CP, *et al.* In utero exposure to levetiracetam vs valproate: development and language at 3 years of age. *Neurology* 2014;**82**:213–21. doi:10.1212/WNL.0000000000000030
- 35 Rihtman T, Parush S, Ornoy A. Preliminary findings of the developmental effects of in utero exposure to topiramate. *Reprod Toxicol Elmsford N* 2012;**34**:308–11. doi:10.1016/j.reprotox.2012.05.038
- 36 Miškov S, Gjergja Juraški R, Mikula I, *et al.* The Croatian model of integrative prospective management of epilepsy and pregnancy. *Acta Clin Croat* 2016;**55**:535–48. doi:10.20471/acc.2016.55.04.02
- 37 Grzeskowiak LE, Gilbert AL, Morrison JL. Exposed or not exposed? Exploring exposure classification in studies using administrative data to investigate outcomes following medication use during pregnancy. *Eur J Clin Pharmacol* 2012;**68**:459–67. doi:10.1007/s00228-011-1154-9
- 38 Adab N, Kini U, Vinten J, *et al.* The longer term outcome of children born to mothers with epilepsy. *J Neurol Neurosurg Psychiatry* 2004;**75**:1575–83. doi:10.1136/jnnp.2003.029132
- 39 Vinten J, Adab N, Kini U, *et al.* Neuropsychological effects of exposure to anticonvulsant medication in utero. *Neurology* 2005;**64**:949–54. doi:10.1212/01.WNL.0000154514.82948.69
- 40 Thapar A, Cooper M, Rutter M. Neurodevelopmental disorders. *Lancet Psychiatry* 2017;**4**:339–46. doi:10.1016/S2215-0366(16)30376-5

1  
2  
3  
4  
5  
6  
7  
8  
9  
10  
11  
12  
13  
14  
15  
16  
17  
18  
19  
20  
21  
22  
23  
24  
25  
26  
27  
28  
29  
30  
31  
32  
33  
34  
35  
36  
37  
38  
39  
40  
41  
42  
43  
44  
45  
46  
47  
48  
49  
50  
51  
52  
53  
54  
55  
56  
57  
58  
59  
60

41 Morgan PL, Hammer CS, Farkas G, *et al.* Who Receives Speech/Language Services by 5 Years of  
42 Age in the United States? *Am J Speech Lang Pathol* 2016;**25**:183–99. doi:10.1044/2015\_AJSLP-  
43 14-0201

44 Kleinman JM, Ventola PE, Pandey J, *et al.* Diagnostic stability in very young children with autism  
45 spectrum disorders. *J Autism Dev Disord* 2008;**38**:606–15. doi:10.1007/s10803-007-0427-8

46 Third Autism Plan [Troisième Plan Autisme] (2013-2017).  
47 <https://www.cnsa.fr/documentation/plan-autisme2013.pdf>

48 French National Institute for Health and Medical Research (INSERM). Synthesis of the collective  
49 experience “Intellectual disabilities” [Synthèse de l’expertise collective “Déficiences  
50 intellectuelles”] (2016). [https://www.inserm.fr/information-en-sante/expertises-](https://www.inserm.fr/information-en-sante/expertises-collectives/deficiences-intellectuelles)  
51 [collectives/deficiences-intellectuelles](https://www.inserm.fr/information-en-sante/expertises-collectives/deficiences-intellectuelles)

52 Agence nationale de sécurité du médicament et des produits de santé (ANSM). Clonazepam:  
53 modification of the conditions of prescription or dispensing [Rivotril® (clonazépam) :  
54 Modification des conditions de prescription et de délivrance]. 2011.[https://ansm.sante.fr/S-](https://ansm.sante.fr/S-informer/Points-d-information-Points-d-information/Rivotril-R-clonazepam-Modification-des-conditions-de-prescription-et-de-delivrance-Point-d-information)  
55 [informer/Points-d-information-Points-d-information/Rivotril-R-clonazepam-Modification-des-](https://ansm.sante.fr/S-informer/Points-d-information-Points-d-information/Rivotril-R-clonazepam-Modification-des-conditions-de-prescription-et-de-delivrance-Point-d-information)  
56 [conditions-de-prescription-et-de-delivrance-Point-d-information](https://ansm.sante.fr/S-informer/Points-d-information-Points-d-information/Rivotril-R-clonazepam-Modification-des-conditions-de-prescription-et-de-delivrance-Point-d-information) (accessed 23 Apr 2019).

Table 1. Baseline characteristics according to AED use during pregnancy

|                                                |                 | Lamotrigine   | Carbamazepine | Clonazepam    | Gabapentin    | Levetiracetam |     |  |
|------------------------------------------------|-----------------|---------------|---------------|---------------|---------------|---------------|-----|--|
| Number of exposed pregnancies                  |                 | 2,916         | 502           | 1,246         | 378           | 621           |     |  |
| Median follow-up (years) (IQR)                 |                 | 3.5 (2.7-4.5) | 3.8 (2.8-4.7) | 4.8 (4.1-5.3) | 3.4 (2.5-4.3) | 3.4 (2.6-4.4) |     |  |
| Maternal age at birth (years)                  | < 25            | 431 (14.8)    | 51 (10.2)     | 118 (9.5)     | 32 (8.5)      | 119 (19.2)    |     |  |
|                                                | [25 - 30[       | 927 (31.8)    | 119 (23.7)    | 302 (24.2)    | 90 (23.8)     | 212 (34.1)    | *   |  |
|                                                | [30 - 35[       | 980 (33.6)    | 168 (33.5)    | 380 (30.5)    | 125 (33.1)    | 181 (29.1)    |     |  |
|                                                | ≥ 35            | 578 (19.8)    | 164 (32.7)    | 446 (35.8)    | 131 (34.7)    | 109 (17.6)    |     |  |
| Eligibility for CMU-C                          |                 | 461 (15.8)    | 98 (19.5)     | 303 (24.3)    | 82 (21.7)     | 134 (21.6)    | **  |  |
| History of mental and behavioral disorders     |                 | 368 (12.6)    | 104 (20.7)    | 216 (17.3)    | 43 (11.4)     | 51 (8.2)      | *   |  |
| Proxy for alcohol intake                       |                 | 35 (1.2)      | 7 (1.4)       | 35 (2.8)      | 6 (1.6)       | 13 (2.1)      | NS  |  |
| Proxy for smoking                              |                 | 311 (10.7)    | 59 (11.8)     | 165 (13.2)    | 66 (17.5)     | 69 (11.1)     | NS  |  |
| Folic acid supplementation                     |                 | 2,026 (69.5)  | 281 (56.0)    | 360 (28.9)    | 139 (36.8)    | 396 (63.8)    | *   |  |
| SSRIs during pregnancy                         |                 | 210 (7.2)     | 42 (8.4)      | 201 (16.1)    | 42 (11.1)     | 23 (3.7)      | *   |  |
| History of antipsychotic use                   |                 | 227 (7.8)     | 64 (12.7)     | 123 (9.9)     | 24 (6.3)      | 15 (2.4)      | *** |  |
| Number of psychiatric medications <sup>a</sup> | 0               | 1,641 (56.3)  | 265 (52.8)    | 492 (39.5)    | 157 (41.5)    | 366 (58.9)    |     |  |
|                                                | 1               | 669 (22.9)    | 107 (21.3)    | 283 (22.7)    | 91 (24.1)     | 138 (22.2)    |     |  |
|                                                | 2               | 258 (8.8)     | 42 (8.4)      | 149 (12.0)    | 49 (13.0)     | 54 (8.7)      | NS  |  |
|                                                | 3-4             | 211 (7.2)     | 52 (10.4)     | 183 (14.7)    | 54 (14.3)     | 39 (6.3)      |     |  |
|                                                | ≥ 5             | 137 (4.7)     | 36 (7.2)      | 139 (11.2)    | 27 (7.1)      | 24 (3.9)      |     |  |
| Gestational age (weeks after LMP)              | < 32            | 11 (0.4)      | 3 (0.6)       | 10 (0.8)      | 2 (0.5)       | 7 (1.1)       |     |  |
|                                                | [32 - 35[       | 42 (1.4)      | 8 (1.6)       | 28 (2.2)      | 23 (6.1)      | 11 (1.8)      | NS  |  |
|                                                | [35 - 37[       | 129 (4.4)     | 14 (2.8)      | 55 (4.4)      | 21 (5.6)      | 33 (5.3)      |     |  |
|                                                | ≥ 37            | 2,734 (93.8)  | 477 (95.0)    | 1,153 (92.5)  | 332 (87.8)    | 570 (91.8)    |     |  |
| Gender (male)                                  |                 | 1,524 (52.3)  | 265 (52.8)    | 597 (47.9)    | 206 (54.5)    | 292 (47.0)    | *   |  |
| Birth weight                                   | < 2,500         | 179 (6.1)     | 35 (7.0)      | 105 (8.4)     | 47 (12.4)     | 60 (9.7)      |     |  |
|                                                | [2,500 - 3,000[ | 630 (21.6)    | 110 (21.9)    | 278 (22.3)    | 73 (19.3)     | 152 (24.5)    | **  |  |
|                                                | [3,000 - 3,500[ | 1,196 (41.0)  | 182 (36.3)    | 485 (38.9)    | 140 (37.0)    | 251 (40.4)    |     |  |
|                                                | ≥ 3,500         | 911 (31.2)    | 175 (34.9)    | 378 (30.3)    | 118 (31.2)    | 158 (25.4)    |     |  |

Table 1. Baseline characteristics according to AED use during pregnancy (continued)

|                                                |                 | Oxcarbazepine |  | Pregabalin    |  | Topiramate    |  | Valproic acid |  |
|------------------------------------------------|-----------------|---------------|--|---------------|--|---------------|--|---------------|--|
| Number of exposed pregnancies                  |                 | 143           |  | 1,627         |  | 477           |  | 991           |  |
| Median follow-up (years) (IQR)                 |                 | 4.0 (2.7-4.8) |  | 3.3 (2.5-4.3) |  | 3.6 (2.6-4.6) |  | 3.9 (2.8-4.8) |  |
| Maternal age at birth (years)                  | < 25            | 23 (16.1)     |  | 139 (8.5)     |  | 66 (13.8)     |  | 137 (13.8)    |  |
|                                                | [25 - 30[       | 32 (22.4)     |  | 414 (25.4)    |  | 144 (30.2)    |  | 259 (26.1)    |  |
|                                                | [30 - 35[       | 52 (36.4)     |  | 495 (30.4)    |  | 153 (32.1)    |  | 310 (31.3)    |  |
|                                                | ≥ 35            | 36 (25.2)     |  | 579 (35.6)    |  | 114 (23.9)    |  | 285 (28.8)    |  |
| Eligibility for CMU-C                          |                 | 36 (25.2)     |  | 404 (24.8)    |  | 79 (16.6)     |  | 311 (31.4)    |  |
| History of mental and behavioral disorders     |                 | 36 (25.2)     |  | 169 (10.4)    |  | 54 (11.3)     |  | 96 (9.7)      |  |
| Proxy for alcohol intake                       |                 | 1 (0.7)       |  | 21 (1.3)      |  | 7 (1.5)       |  | 22 (2.2)      |  |
| Proxy for smoking                              |                 | 13 (9.1)      |  | 257 (15.8)    |  | 43 (9.0)      |  | 136 (13.7)    |  |
| Folic acid supplementation                     |                 | 89 (62.2)     |  | 440 (27.0)    |  | 179 (37.5)    |  | 525 (53.0)    |  |
| SSRIs during pregnancy                         |                 | 22 (15.4)     |  | 172 (10.6)    |  | 55 (11.5)     |  | 33 (3.3)      |  |
| History of antipsychotic use                   |                 | 31 (21.7)     |  | 79 (4.9)      |  | 30 (6.3)      |  | 49 (4.9)      |  |
| Number of psychiatric medications <sup>a</sup> | 0               | 65 (45.5)     |  | 701 (43.1)    |  | 217 (45.5)    |  | 653 (65.9)    |  |
|                                                | 1               | 33 (23.1)     |  | 355 (21.8)    |  | 92 (19.3)     |  | 180 (18.2)    |  |
|                                                | 2               | 14 (9.8)      |  | 227 (14.0)    |  | 69 (14.5)     |  | 67 (6.8)      |  |
|                                                | 3-4             | 9 (6.3)       |  | 216 (13.3)    |  | 68 (14.3)     |  | 45 (4.5)      |  |
|                                                | ≥ 5             | 22 (15.4)     |  | 128 (7.9)     |  | 31 (6.5)      |  | 46 (4.6)      |  |
| Gestational age (weeks after LMP)              | < 32            | 1 (0.7)       |  | 12 (0.7)      |  | 7 (1.5)       |  | 7 (0.7)       |  |
|                                                | [32 - 35[       | 3 (2.1)       |  | 37 (2.3)      |  | 10 (2.1)      |  | 19 (1.9)      |  |
|                                                | [35 - 37[       | 6 (4.2)       |  | 61 (3.7)      |  | 19 (4.0)      |  | 45 (4.5)      |  |
|                                                | ≥ 37            | 133 (93.0)    |  | 1,517 (93.2)  |  | 441 (92.5)    |  | 920 (92.8)    |  |
| Gender (male)                                  |                 | 65 (45.5)     |  | 847 (52.1)    |  | 254 (53.2)    |  | 496 (50.1)    |  |
| Birth weight                                   | < 2,500         | 12 (8.4)      |  | 118 (7.3)     |  | 32 (6.7)      |  | 88 (8.9)      |  |
|                                                | [2,500 - 3,000[ | 30 (21.0)     |  | 324 (19.9)    |  | 90 (18.9)     |  | 227 (22.9)    |  |

|  |                 |           |            |            |            |
|--|-----------------|-----------|------------|------------|------------|
|  | [3,000 - 3,500[ | 60 (42.0) | 630 (38.7) | 203 (42.6) | 389 (39.3) |
|  | ≥ 3,500         | 41 (28.7) | 555 (34.1) | 152 (31.9) | 287 (29.0) |

Abbreviations: AED = antiepileptic drug; IQR = interquartile range; CMU- C = complementary universal health insurance for low-income people; SSRIs = selective serotonin reuptake inhibitors; LMP = last menstrual period

Figures are N (%).

<sup>a</sup> Number of 5th level ATC classes of psychiatric medications to whom mothers were exposed in the year before pregnancy

\*\*\* p <0.0001; \*\* p <0.001; \* p <0.05; NS: Not Significant

Table 2. Number of events, crude event rates (per 1,000), crude IRRs and adjusted HRs for the four outcomes and each of the AEDs studied - main analysis

|                                          | Events    | Crude event rates | IRR                    | HR [95% CI]            |
|------------------------------------------|-----------|-------------------|------------------------|------------------------|
| <i>Neurodevelopmental disorders</i>      |           |                   |                        |                        |
| Lamotrigine                              | 51        | 4.9               |                        |                        |
| Carbamazepine                            | 13        | 7.0               | 1.4 [0.8 - 2.6]        | 1.2 [0.6 - 2.2]        |
| Clonazepam                               | 28        | 5.1               | 1.0 [0.6 - 1.6]        | 0.6 [0.4 - 1.1]        |
| Gabapentin                               | 4         | 3.1               | 0.6 [0.2 - 1.7]        | 0.4 [0.1 - 1.3]        |
| Levetiracetam                            | 8         | 3.7               | 0.8 [0.4 - 1.6]        | 0.7 [0.3 - 1.5]        |
| Oxcarbazepine                            | 3         | 5.6               | 1.1 [0.4 - 3.7]        | 0.8 [0.2 - 3.2]        |
| Pregabalin                               | 28        | 5.0               | 1.0 [0.6 - 1.6]        | 0.6 [0.4 - 1.0]        |
| Topiramate                               | 7         | 4.1               | 0.8 [0.4 - 1.8]        | 0.8 [0.4 - 1.9]        |
| <b>Valproic acid</b>                     | <b>50</b> | <b>13.5</b>       | <b>2.7 [1.9 - 4.0]</b> | <b>2.7 [1.8 - 4.0]</b> |
| <i>Pervasive developmental disorders</i> |           |                   |                        |                        |
| Lamotrigine                              | 11        | 1.1               |                        |                        |
| Carbamazepine                            | 3         | 1.6               | 1.5 [0.4 - 5.4]        | 1.3 [0.3 - 5.0]        |
| Clonazepam                               | 8         | 1.4               | 1.4 [0.5 - 3.4]        | 0.8 [0.3 - 2.1]        |
| Gabapentin                               | 3         | 2.3               | 2.2 [0.6 - 7.9]        | 1.8 [0.4 - 7.0]        |
| Levetiracetam                            | 4         | 1.8               | 1.8 [0.6 - 5.5]        | 1.6 [0.5 - 5.4]        |
| Oxcarbazepine                            | 1         | 1.9               | 1.8 [0.2 - 13.6]       | 2.0 [0.3 - 13.8]       |
| Pregabalin                               | 7         | 1.2               | 1.2 [0.5 - 3.1]        | 1.1 [0.4 - 3.0]        |
| Topiramate                               | 1         | 0.6               | 0.6 [0.1 - 4.3]        | 0.3 [0.0 - 4.9]        |
| <b>Valproic acid</b>                     | <b>17</b> | <b>4.5</b>        | <b>4.3 [2.0 - 9.1]</b> | <b>4.4 [2.1 - 9.3]</b> |
| <i>Mental retardation</i>                |           |                   |                        |                        |
| Lamotrigine                              | 15        | 1.4               |                        |                        |
| Carbamazepine                            | 2         | 1.1               | 0.7 [0.2 - 3.2]        | 0.6 [0.1 - 2.9]        |
| Clonazepam                               | 3         | 0.5               | 0.4 [0.1 - 1.3]        | 0.3 [0.1 - 1.2]        |
| Gabapentin                               | 0         | 0.0               | N/A                    | N/A                    |
| Levetiracetam                            | 1         | 0.5               | 0.3 [0.0 - 2.4]        | 0.3 [0.0 - 2.5]        |
| Oxcarbazepine                            | 0         | 0.0               | N/A                    | N/A                    |
| Pregabalin                               | 7         | 1.2               | 0.9 [0.4 - 2.1]        | 0.6 [0.2 - 1.8]        |
| Topiramate                               | 2         | 1.2               | 0.8 [0.2 - 3.5]        | 0.5 [0.1 - 3.3]        |
| <b>Valproic acid</b>                     | <b>15</b> | <b>4.0</b>        | <b>2.8 [1.3 - 5.6]</b> | <b>3.1 [1.5 - 6.2]</b> |
| <i>Visits to a speech therapist</i>      |           |                   |                        |                        |
| Lamotrigine                              | 157       | 15.2              |                        |                        |
| Carbamazepine                            | 31        | 16.7              | 1.1 [0.8 - 1.6]        | 0.9 [0.6 - 1.4]        |
| Clonazepam                               | 97        | 17.7              | 1.2 [0.9 - 1.5]        | 0.8 [0.6 - 1.0]        |
| Gabapentin                               | 11        | 8.5               | 0.6 [0.3 - 1.0]        | 0.7 [0.4 - 1.2]        |
| Levetiracetam                            | 22        | 10.2              | 0.7 [0.4 - 1.1]        | 0.7 [0.5 - 1.1]        |
| Oxcarbazepine                            | 13        | 24.6              | 1.6 [0.9 - 2.9]        | 1.3 [0.7 - 2.5]        |
| <b>Pregabalin</b>                        | <b>61</b> | <b>11.0</b>       | <b>0.7 [0.5 - 1.0]</b> | <b>0.7 [0.5 - 1.0]</b> |
| Topiramate                               | 33        | 19.4              | 1.3 [0.9 - 1.9]        | 1.2 [0.8 - 1.8]        |
| <b>Valproic acid</b>                     | <b>93</b> | <b>25.1</b>       | <b>1.7 [1.3 - 2.1]</b> | <b>1.5 [1.1 - 1.9]</b> |

Abbreviations: AED = antiepileptic drug; IRR = incidence rate ratio; HR = hazard ratio; N/A = not applicable

Lines marked in bold correspond to HRs for which the 95% CI does not include 1.

For peer review only

Table 3. Number of events, crude event rates (per 1,000), crude IRRs and adjusted HRs for the four outcomes and each of the AEDs studied - study population limited to women considered to be treated for epilepsy

|                                          | Events    | Crude event rates | IRR                     | HR <sup>a</sup> [95% CI] | HR <sup>b</sup> [95% CI] |
|------------------------------------------|-----------|-------------------|-------------------------|--------------------------|--------------------------|
| <i>Neurodevelopmental disorders</i>      |           |                   |                         |                          |                          |
| Lamotrigine                              | 32        | 4.2               |                         |                          |                          |
| Carbamazepine <sup>c</sup>               | 1         | 1.5               | 0.4 [0.0 - 2.7]         | 0.2 [0.0 - 2.7]          | 0.2 [0.0 - 2.7]          |
| Levetiracetam                            | 8         | 3.7               | 0.9 [0.4 - 1.9]         | 0.8 [0.4 - 1.8]          | 0.8 [0.4 - 1.8]          |
| <b>Valproic acid</b>                     | <b>50</b> | <b>13.5</b>       | <b>3.2 [2.0 - 5.0]</b>  | <b>3.2 [2.0 - 4.9]</b>   | <b>3.5 [2.3 - 5.4]</b>   |
| <i>Pervasive developmental disorders</i> |           |                   |                         |                          |                          |
| Lamotrigine                              | 7         | 0.9               |                         |                          |                          |
| Carbamazepine <sup>c</sup>               | 0         | 0.0               | N/A                     | N/A                      | N/A                      |
| Levetiracetam                            | 4         | 1.8               | 2.0 [0.6 - 6.8]         | 1.8 [0.5 - 6.6]          | 1.8 [0.5 - 6.6]          |
| <b>Valproic acid</b>                     | <b>17</b> | <b>4.5</b>        | <b>4.9 [2.0 - 11.8]</b> | <b>4.9 [2.0 - 11.8]</b>  | <b>4.7 [1.9 - 11.4]</b>  |
| <i>Mental retardation</i>                |           |                   |                         |                          |                          |
| Lamotrigine                              | 10        | 1.3               |                         |                          |                          |
| Carbamazepine <sup>c</sup>               | 0         | 0.0               | N/A                     | N/A                      | N/A                      |
| Levetiracetam                            | 1         | 0.5               | 0.3 [0.0 - 2.7]         | 0.4 [0.1 - 2.9]          | 0.4 [0.1 - 2.9]          |
| <b>Valproic acid</b>                     | <b>15</b> | <b>4.0</b>        | <b>3.0 [1.4 - 6.7]</b>  | <b>3.1 [1.4 - 7.0]</b>   | <b>4.0 [1.9 - 8.6]</b>   |
| <i>Visits to a speech therapist</i>      |           |                   |                         |                          |                          |
| Lamotrigine                              | 122       | 16.2              |                         |                          |                          |
| <b>Carbamazepine<sup>c</sup></b>         | <b>4</b>  | <b>6.1</b>        | <b>0.4 [0.1 - 1.0]</b>  | <b>0.2 [0.1 - 0.7]</b>   | <b>0.2 [0.1 - 0.7]</b>   |
| Levetiracetam                            | 22        | 10.2              | 0.6 [0.4 - 1.0]         | 0.7 [0.4 - 1.1]          | 0.7 [0.4 - 1.1]          |
| <b>Valproic acid</b>                     | <b>93</b> | <b>25.1</b>       | <b>1.6 [1.2 - 2.0]</b>  | <b>1.4 [1.1 - 1.8]</b>   | <b>1.5 [1.1 - 1.9]</b>   |

Abbreviations: AED = antiepileptic drug; IRR = incidence rate ratio; HR = hazard ratio; N/A = not applicable

Lines marked in bold correspond to HRs for which the 95% CI does not include 1.

<sup>a</sup> adjusted for all covariates except hospitalization for epilepsy during pregnancy

<sup>b</sup> adjusted for all covariates including hospitalization for epilepsy during pregnancy

<sup>c</sup> no possible adjustment for the proxy for alcohol

Table 4. Number of events, crude event rates (per 1,000), crude IRRs and adjusted HRs for the four outcomes according to the dose of valproic acid dispensed during pregnancy - main analysis and sensitivity analysis restricted to women considered to be treated for epilepsy

|                                         |               | Events | Crude<br>event rates | Main analysis     |                          | Women with epilepsy |                          |                          |
|-----------------------------------------|---------------|--------|----------------------|-------------------|--------------------------|---------------------|--------------------------|--------------------------|
|                                         |               |        |                      | IRR               | HR <sup>a</sup> [95% CI] | IRR                 | HR <sup>a</sup> [95% CI] | HR <sup>b</sup> [95% CI] |
| Neuro-<br>developmental<br>disorders    | < 700 mg      | 7      | 6.3                  | 1.3 [0.6 - 2.8]   | 1.3 [0.6 - 2.8]          | 1.5 [0.7 - 3.4]     | 1.6 [0.7 - 3.6]          | 1.6 [0.7 - 3.6]          |
|                                         | [700-1500 mg[ | 23     | 11.5                 | 2.3 [1.4 - 3.8]   | 2.1 [1.3 - 3.5]          | 2.7 [1.6 - 4.6]     | 2.5 [1.5 - 4.3]          | 2.7 [1.6 - 4.6]          |
|                                         | ≥ 1500 mg     | 20     | 33.5                 | 6.8 [4.1 - 11.5]  | 7.0 [4.3 - 11.5]         | 7.9 [4.5 - 13.8]    | 8.6 [5.1 - 14.5]         | 8.7 [5.2 - 14.6]         |
| Pervasive<br>developmental<br>disorders | < 700 mg      | 2      | 1.8                  | 1.7 [0.4 - 7.6]   | 2.2 [0.5 - 8.5]          | 1.9 [0.4 - 9.3]     | 2.9 [0.7 - 11.6]         | 2.7 [0.7 - 11.4]         |
|                                         | [700-1500 mg[ | 7      | 3.4                  | 3.3 [1.3 - 8.4]   | 2.7 [1.0 - 7.1]          | 3.7 [1.3 - 10.7]    | 3.1 [1.1 - 9.0]          | 3.0 [1.0 - 8.9]          |
|                                         | ≥ 1500 mg     | 8      | 12.8                 | 12.2 [4.9 - 30.4] | 14.7 [6.2 - 34.7]        | 14.0 [5.1 - 38.5]   | 17.0 [6.5 - 44.6]        | 15.4 [5.7 - 41.1]        |
| Mental<br>retardation                   | < 700 mg      | 5      | 4.4                  | 3.1 [1.1 - 8.5]   | 1.5 [0.4 - 5.9]          | 3.4 [1.2 - 9.9]     | 1.8 [0.4 - 7.0]          | 1.6 [0.4 - 6.7]          |
|                                         | [700-1500 mg[ | 5      | 2.5                  | 1.7 [0.6 - 4.7]   | 1.8 [0.7 - 4.9]          | 1.9 [0.6 - 5.5]     | 1.9 [0.7 - 5.7]          | 2.6 [1.0 - 6.7]          |
|                                         | ≥ 1500 mg     | 5      | 7.9                  | 5.5 [2.0 - 15.2]  | 7.3 [3.0 - 17.7]         | 6.0 [2.1 - 17.6]    | 7.1 [2.7 - 18.7]         | 8.4 [3.4 - 20.4]         |
| Visits to a speech<br>therapist         | < 700 mg      | 13     | 11.6                 | 0.8 [0.4 - 1.3]   | 0.6 [0.3 - 1.0]          | 0.7 [0.4 - 1.3]     | 0.6 [0.3 - 1.0]          | 0.5 [0.3 - 0.9]          |
|                                         | [700-1500 mg[ | 54     | 27.3                 | 1.8 [1.3 - 2.5]   | 1.6 [1.2 - 2.1]          | 1.7 [1.2 - 2.3]     | 1.5 [1.1 - 2.0]          | 1.5 [1.1 - 2.1]          |
|                                         | ≥ 1500 mg     | 26     | 43.4                 | 2.9 [1.9 - 4.3]   | 2.6 [1.7 - 4.0]          | 2.7 [1.8 - 4.1]     | 2.6 [1.7 - 4.0]          | 2.7 [1.8 - 4.1]          |

Abbreviations: IRR = incidence rate ratio; HR = hazard ratio

<sup>a</sup> adjusted for all covariates except hospitalization for epilepsy during pregnancy

<sup>b</sup> adjusted for all covariates including hospitalization for epilepsy during pregnancy

1  
2  
3 Figure 1. Inclusion flow chart  
4

5 Abbreviation: AED = antiepileptic drug  
6  
7  
8

9  
10 Figure 2. Differences in baseline covariates between children exposed to lamotrigine  
11 (reference group) and children exposed to the other AEDs studied before (grey dots) and after  
12 IPTW (black dots)  
13

14 Abbreviations: AED = antiepileptic drug; IPTW = inverse probability of treatment weighting;  
15 cmu-c = complementary universal health insurance; n.psy. medications = number of ATC  
16 classes of psychiatric medications  
17  
18  
19  
20  
21  
22  
23  
24  
25  
26  
27  
28  
29  
30  
31  
32  
33  
34  
35  
36  
37  
38  
39  
40  
41  
42  
43  
44  
45  
46  
47  
48  
49  
50  
51  
52  
53  
54  
55  
56  
57  
58  
59  
60

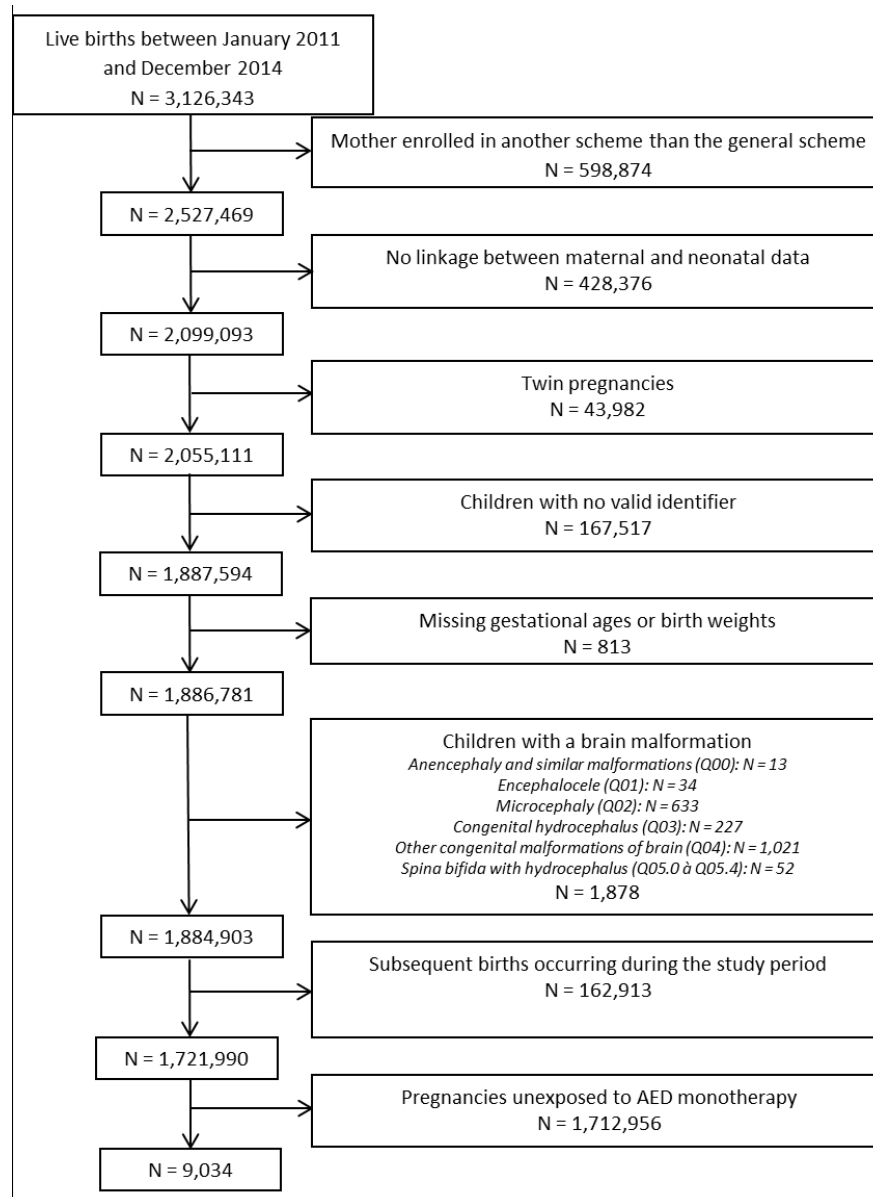

152x195mm (150 x 150 DPI)

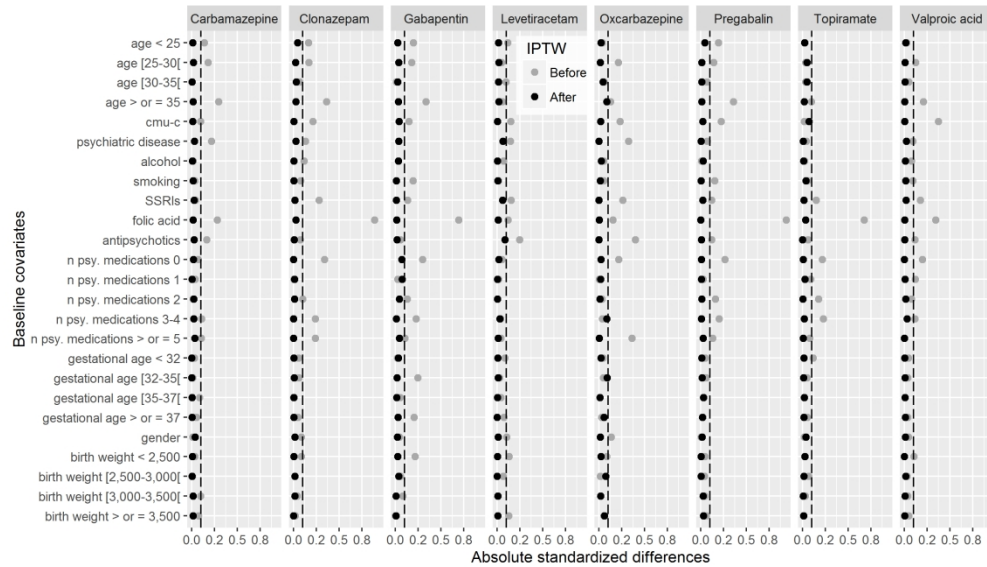

**Supplementary Table 1. Hospital discharge diagnoses, LTD diagnoses and ATC codes used to identify comorbidities and comedications**

|                                            | Hospital discharge diagnoses (PD, RD and AD)                                                                                                | LTD                                   | Specific drug reimbursements                                                                                                                                                                                                                                           |
|--------------------------------------------|---------------------------------------------------------------------------------------------------------------------------------------------|---------------------------------------|------------------------------------------------------------------------------------------------------------------------------------------------------------------------------------------------------------------------------------------------------------------------|
| <b>Exclusion criterion</b>                 |                                                                                                                                             |                                       |                                                                                                                                                                                                                                                                        |
| Brain malformation                         | Q00-04, Q05.0-05.4 <sup>a</sup>                                                                                                             |                                       |                                                                                                                                                                                                                                                                        |
| <b>Comorbidities</b>                       |                                                                                                                                             |                                       |                                                                                                                                                                                                                                                                        |
| History of mental and behavioral disorders | F00-99 (except F10, F17) <sup>b</sup>                                                                                                       | F00-99 (except F10, F17) <sup>c</sup> |                                                                                                                                                                                                                                                                        |
| Proxy for alcohol intake                   | E24.4, F10, G31.2, G62.1, G72.1, I42.6, K29.2, K70, K86.0, P04.3, Q86.0, R78.0, T51, X45, X65, Y15, Y57.3, Z50.2, Z71.4, Z72.1 <sup>d</sup> | F10, K70 <sup>e</sup>                 | Disulfiram, Acamprosate, Naltrexone, Nalmefene <sup>d</sup>                                                                                                                                                                                                            |
| Proxy for smoking                          | F17, I73.1, J41-44, P04.2, T65.2, Z71.6, Z72.0 <sup>d</sup>                                                                                 | F17, J41-44 <sup>e</sup>              | Nicotine replacement therapy<br>Indacaterol, olodaterol, tiotropium bromide, umeclidinium bromide, glycopyrronium bromide <sup>d</sup>                                                                                                                                 |
| <b>Indication</b>                          |                                                                                                                                             |                                       |                                                                                                                                                                                                                                                                        |
| Epilepsy                                   | G40, G41 <sup>d</sup>                                                                                                                       | G40, G41 <sup>e</sup>                 | Valproic acid as an AED, eslicarbazepine, ethosuximide, lacosamide, levetiracetam, perampanel, phenobarbital, phenytoin, retigabine, rufinamide, stiripentol, vigabatrin, zonisamide or lamotrigine, oxcarbazepine, primidone prescribed by a neurologist <sup>d</sup> |
| <b>Comedications</b>                       |                                                                                                                                             |                                       |                                                                                                                                                                                                                                                                        |
| Folic acid supplementation                 |                                                                                                                                             |                                       | Reimbursed folic acid treatments <sup>f</sup>                                                                                                                                                                                                                          |
| SSRIs                                      |                                                                                                                                             |                                       | Fluoxetine, citalopram, paroxetine, sertraline, fluvoxamine, escitalopram <sup>g</sup>                                                                                                                                                                                 |
| Antipsychotics                             |                                                                                                                                             |                                       | First- and second-generation antipsychotics <sup>b</sup>                                                                                                                                                                                                               |
| Proxy for severity of mental disorder      |                                                                                                                                             |                                       | Hypnotics, anxiolytics, antidepressants, antipsychotics <sup>b</sup>                                                                                                                                                                                                   |

Abbreviations: PD = primary diagnosis; RD = related diagnosis; AD = associated diagnosis; LTD = long-term disease; SSRIs = selective serotonin reuptake inhibitors

<sup>a</sup> during the birth stay

1  
2  
3  
4  
5  
6  
7  
8  
9  
10  
11  
12  
13  
14  
15  
16  
17  
18  
19  
20  
21  
22  
23  
24  
25  
26  
27  
28  
29  
30  
31  
32  
33  
34  
35  
36  
37  
38  
39  
40  
41  
42  
43  
44  
45  
46

- <sup>b</sup> in the year before pregnancy
- <sup>c</sup> beginning before pregnancy
- <sup>d</sup> in the year before or during pregnancy
- <sup>e</sup> beginning before birth
- <sup>f</sup> between one month before pregnancy and 3 months after the start of pregnancy
- <sup>g</sup> during pregnancy

For peer review only

**Supplementary Table 2. Study drugs**

| Drug name                  | ATC code |
|----------------------------|----------|
| Carbamazepine              | N03AF01  |
| Clonazepam                 | N03AE01  |
| Eslicarbazepine            | N03AF04  |
| Ethosuximide               | N03AD01  |
| Gabapentin                 | N03AX12  |
| Lacosamide                 | N03AX18  |
| Lamotrigine                | N03AX09  |
| Levetiracetam              | N03AX14  |
| Oxcarbazepine              | N03AF02  |
| Perampanel                 | N03AX22  |
| Phenobarbital              | N03AA02  |
| Phenytoin                  | N03AB02  |
| Pregabalin                 | N03AX16  |
| Primidone                  | N03AA03  |
| Retigabine                 | N03AX21  |
| Rufinamide                 | N03AF03  |
| Stiripentol                | N03AX17  |
| Tiagabine                  | N03AG06  |
| Topiramate                 | N03AX11  |
| Valproic acid <sup>a</sup> | N03AG01  |
| Vigabatrin                 | N03AG04  |
| Zonisamide                 | N03AX15  |

Abbreviation: ATC code = anatomical therapeutic chemical code

<sup>a</sup>Divalproex sodium and valpromide are only indicated for the treatment of bipolar disorder in France and are therefore not considered to be AEDs.

Supplementary Table 3. Baseline characteristics according to AED use during pregnancy - study population limited to women considered to be treated for epilepsy

|                                                |                 | Lamotrigine  | Carbamazepine | Levetiracetam | Valproic acid |     |     |
|------------------------------------------------|-----------------|--------------|---------------|---------------|---------------|-----|-----|
| Number of exposed pregnancies                  |                 | 2,108        | 176           | 621           | 991           |     |     |
| Maternal age at birth (years)                  | < 25            | 349 (16.6)   | 21 (11.9)     | 119 (19.2)    | 137 (13.8)    |     |     |
|                                                | [25 - 30[       | 715 (33.9)   | 42 (23.9)     | 212 (34.1)    | 259 (26.1)    | NS  | *** |
|                                                | [30 - 35[       | 679 (32.2)   | 60 (34.1)     | 181 (29.1)    | 310 (31.3)    |     |     |
|                                                | ≥ 35            | 365 (17.3)   | 53 (30.1)     | 109 (17.6)    | 285 (28.8)    |     |     |
| Eligibility for CMU-C                          |                 | 340 (16.1)   | 30 (17.0)     | 134 (21.6)    | 311 (31.4)    | *   | *** |
| Hospitalization for epilepsy                   |                 | 171 (8.1)    | 13 (7.4)      | 43 (6.9)      | 22 (2.2)      | NS  | *** |
| History of mental and behavioral disorders     |                 | 150 (7.1)    | 18 (10.2)     | 51 (8.2)      | 96 (9.7)      | NS  | *   |
| Proxy for alcohol intake                       |                 | 18 (0.9)     | 0 (0.0)       | 13 (2.1)      | 22 (2.2)      | *   | *   |
| Proxy for smoking                              |                 | 204 (9.7)    | 21 (11.9)     | 69 (11.1)     | 136 (13.7)    | NS  | **  |
| Folic acid supplementation                     |                 | 1,537 (72.9) | 133 (75.6)    | 396 (63.8)    | 525 (53.0)    | *** | *** |
| SSRIs during pregnancy                         |                 | 55 (2.6)     | 5 (2.8)       | 23 (3.7)      | 33 (3.3)      | NS  | NS  |
| History of antipsychotic use                   |                 | 40 (1.9)     | 4 (2.3)       | 15 (2.4)      | 49 (4.9)      | NS  | *** |
| Number of psychiatric medications <sup>a</sup> | 0               | 1,286 (61.0) | 105 (59.7)    | 366 (58.9)    | 653 (65.9)    |     |     |
|                                                | 1               | 522 (24.8)   | 51 (29.0)     | 138 (22.2)    | 180 (18.2)    |     |     |
|                                                | 2               | 167 (7.9)    | 11 (6.3)      | 54 (8.7)      | 67 (6.8)      | *   | *** |
|                                                | 3-4             | 91 (4.3)     | 4 (2.3)       | 39 (6.3)      | 45 (4.5)      |     |     |
|                                                | ≥ 5             | 42 (2.0)     | 5 (2.8)       | 24 (3.9)      | 46 (4.6)      |     |     |
| Gestational age (weeks after LMP)              | < 32            | 8 (0.4)      | 2 (1.1)       | 7 (1.1)       | 7 (0.7)       |     |     |
|                                                | [32 - 35[       | 32 (1.5)     | 2 (1.1)       | 11 (1.8)      | 19 (1.9)      | NS  | NS  |
|                                                | [35 - 37[       | 91 (4.3)     | 5 (2.8)       | 33 (5.3)      | 45 (4.5)      |     |     |
|                                                | ≥ 37            | 1,977 (93.8) | 167 (94.9)    | 570 (91.8)    | 920 (92.8)    |     |     |
| Gender (male)                                  |                 | 1,115 (52.9) | 96 (54.5)     | 292 (47.0)    | 496 (50.1)    | *   | NS  |
| Birth weight                                   | < 2,500         | 128 (6.1)    | 14 (8.0)      | 60 (9.7)      | 88 (8.9)      |     |     |
|                                                | [2,500 - 3,000[ | 460 (21.8)   | 42 (23.9)     | 152 (24.5)    | 227 (22.9)    | *   | *   |
|                                                | [3,000 - 3,500[ | 872 (41.4)   | 63 (35.8)     | 251 (40.4)    | 389 (39.3)    |     |     |
|                                                | ≥ 3,500         | 648 (30.7)   | 57 (32.4)     | 158 (25.4)    | 287 (29.0)    |     |     |

Abbreviations: AED = antiepileptic drug; CMU- C = complementary universal health insurance for low-income people; SSRIs = selective serotonin reuptake inhibitors; LMP = last menstrual period

Figures are N (%)

<sup>a</sup> Number of 5th level ATC classes of psychiatric medications to whom mothers were exposed in the year before pregnancy

\*\*\* p <0.0001; \*\* p <0.001; \* p <0.05; NS: Not Significant

**Supplementary Table 4. Number of children, number of events, crude event rates (per 1,000), crude IRRs and adjusted HRs for the four outcomes and each of the AEDs studied - exposure limited to dispensing during pregnancy**

|                                          | Children   | Events    | Crude event rates | IRR                     | HR [95% CI]            |
|------------------------------------------|------------|-----------|-------------------|-------------------------|------------------------|
| <b>Neurodevelopmental disorders</b>      |            |           |                   |                         |                        |
| Lamotrigine                              | 2,832      | 49        | 4.9               |                         |                        |
| Carbamazepine                            | 431        | 11        | 6.9               | 1.4 [0.7 - 2.7]         | 1.1 [0.6 - 2.3]        |
| Clonazepam                               | 876        | 21        | 5.4               | 1.1 [0.7 - 1.9]         | 0.7 [0.4 - 1.3]        |
| Gabapentin                               | 273        | 3         | 3.2               | 0.7 [0.2 - 2.1]         | 0.4 [0.1 - 1.7]        |
| Levetiracetam                            | 595        | 8         | 3.9               | 0.8 [0.4 - 1.7]         | 0.7 [0.3 - 1.6]        |
| Oxcarbazepine                            | 128        | 3         | 6.4               | 1.3 [0.4 - 4.2]         | 0.9 [0.2 - 3.6]        |
| Pregabalin                               | 951        | 19        | 5.8               | 1.2 [0.7 - 2.0]         | 0.7 [0.4 - 1.3]        |
| Topiramate                               | 338        | 6         | 4.9               | 1.0 [0.4 - 2.4]         | 1.0 [0.4 - 2.4]        |
| <b>Valproic acid</b>                     | <b>911</b> | <b>49</b> | <b>14.4</b>       | <b>3.0 [2.0 - 4.4]</b>  | <b>2.8 [1.9 - 4.2]</b> |
| <b>Pervasive developmental disorders</b> |            |           |                   |                         |                        |
| Lamotrigine                              | 2,832      | 10        | 1.0               |                         |                        |
| Carbamazepine                            | 431        | 3         | 1.8               | 1.9 [0.5 - 6.8]         | 1.6 [0.4 - 6.3]        |
| Clonazepam                               | 876        | 5         | 1.3               | 1.3 [0.4 - 3.8]         | 0.8 [0.3 - 2.6]        |
| Gabapentin                               | 273        | 2         | 2.2               | 2.2 [0.5 - 10.0]        | 2.0 [0.4 - 9.3]        |
| Levetiracetam                            | 595        | 4         | 1.9               | 2.0 [0.6 - 6.2]         | 1.8 [0.5 - 6.2]        |
| Oxcarbazepine                            | 128        | 1         | 2.1               | 2.1 [0.3 - 16.6]        | 2.2 [0.3 - 16.9]       |
| Pregabalin                               | 951        | 5         | 1.5               | 1.5 [0.5 - 4.5]         | 1.5 [0.5 - 4.5]        |
| Topiramate                               | 338        | 0         | 0.0               | N/A                     | N/A                    |
| <b>Valproic acid</b>                     | <b>911</b> | <b>16</b> | <b>4.6</b>        | <b>4.7 [2.1 - 10.4]</b> | <b>4.4 [2.0 - 9.6]</b> |
| <b>Mental retardation</b>                |            |           |                   |                         |                        |
| Lamotrigine                              | 2,832      | 14        | 1.4               |                         |                        |
| Carbamazepine                            | 431        | 2         | 1.2               | 0.9 [0.2 - 3.9]         | 0.6 [0.1 - 3.5]        |
| Clonazepam                               | 876        | 3         | 0.8               | 0.6 [0.2 - 1.9]         | 0.4 [0.1 - 1.7]        |
| Gabapentin                               | 273        | 0         | 0.0               | N/A                     | N/A                    |
| Levetiracetam                            | 595        | 1         | 0.5               | 0.3 [0.0 - 2.7]         | 0.4 [0.1 - 2.8]        |
| Oxcarbazepine                            | 128        | 0         | 0.0               | N/A                     | N/A                    |
| Pregabalin                               | 951        | 4         | 1.2               | 0.9 [0.3 - 2.7]         | 0.5 [0.1 - 2.2]        |
| Topiramate                               | 338        | 1         | 0.8               | 0.6 [0.1 - 4.5]         | 0.4 [0.0 - 4.7]        |
| <b>Valproic acid</b>                     | <b>911</b> | <b>14</b> | <b>4.0</b>        | <b>2.9 [1.4 - 6.2]</b>  | <b>3.0 [1.4 - 6.3]</b> |
| <b>Visits to a speech therapist</b>      |            |           |                   |                         |                        |
| Lamotrigine                              | 2,832      | 152       | 15.1              |                         |                        |
| Carbamazepine                            | 431        | 27        | 16.9              | 1.1 [0.7 - 1.7]         | 1.0 [0.6 - 1.5]        |
| Clonazepam                               | 876        | 63        | 16.3              | 1.1 [0.8 - 1.4]         | 0.8 [0.6 - 1.1]        |
| Gabapentin                               | 273        | 9         | 9.8               | 0.6 [0.3 - 1.3]         | 0.7 [0.4 - 1.3]        |
| Levetiracetam                            | 595        | 22        | 10.7              | 0.7 [0.5 - 1.1]         | 0.7 [0.5 - 1.2]        |
| Oxcarbazepine                            | 128        | 13        | 27.9              | 1.8 [1.0 - 3.3]         | 1.7 [1.0 - 3.1]        |
| <b>Pregabalin</b>                        | <b>951</b> | <b>38</b> | <b>11.6</b>       | <b>0.8 [0.5 - 1.1]</b>  | <b>0.6 [0.4 - 0.9]</b> |

**Supplementary Table 4. Number of children, number of events, crude event rates (per 1,000), crude IRRs and adjusted HRs for the four outcomes and each of the AEDs studied - exposure limited to dispensing during pregnancy (continued)**

|                             | Children          | Events           | Crude event rates  | IRR                           | HR [95% CI]                   |
|-----------------------------|-------------------|------------------|--------------------|-------------------------------|-------------------------------|
| Topiramate                  | 338               | 25               | 20.8               | 1.4 [0.9 - 2.1]               | 1.5 [0.9 - 2.2]               |
| <b><i>Valproic acid</i></b> | <b><i>911</i></b> | <b><i>85</i></b> | <b><i>25.1</i></b> | <b><i>1.7 [1.3 - 2.2]</i></b> | <b><i>1.5 [1.1 - 1.9]</i></b> |

Abbreviations: AED = antiepileptic drug; IRR = incidence rate ratio; HR = hazard ratio; N/A = not applicable  
Lines marked in bold and italics correspond to HRs for which the 95% CI does not include 1.

For peer review only

**Supplementary Table 5. HRs for the four outcomes and each of the AEDs studied - propensity score excluding proxies for alcohol intake and smoking or gestational age and birth weight**

|                                          | HR <sup>a</sup> [95% CI]      | HR <sup>b</sup> [95% CI]      |
|------------------------------------------|-------------------------------|-------------------------------|
| <b>Neurodevelopmental disorders</b>      |                               |                               |
| Carbamazepine                            | 1.2 [0.6 - 2.2]               | 1.2 [0.6 - 2.3]               |
| Clonazepam                               | 0.7 [0.4 - 1.1]               | 0.7 [0.4 - 1.1]               |
| Gabapentin                               | 0.4 [0.1 - 1.3]               | 0.4 [0.1 - 1.4]               |
| Levetiracetam                            | 0.7 [0.3 - 1.5]               | 0.7 [0.3 - 1.5]               |
| Oxcarbazepine                            | 0.9 [0.2 - 3.3]               | 0.8 [0.2 - 3.2]               |
| Pregabalin                               | 0.6 [0.4 - 1.0]               | 0.7 [0.4 - 1.1]               |
| Topiramate                               | 0.8 [0.4 - 1.8]               | 0.8 [0.4 - 1.8]               |
| <b><i>Valproic acid</i></b>              | <b><i>2.7 [1.9 - 4.0]</i></b> | <b><i>2.7 [1.9 - 4.0]</i></b> |
| <b>Pervasive developmental disorders</b> |                               |                               |
| Carbamazepine                            | 1.3 [0.3 - 5.0]               | 1.4 [0.4 - 5.3]               |
| Clonazepam                               | 0.8 [0.3 - 2.1]               | 0.8 [0.3 - 2.1]               |
| Gabapentin                               | 1.7 [0.4 - 7.0]               | 1.5 [0.4 - 6.7]               |
| Levetiracetam                            | 1.5 [0.4 - 5.3]               | 1.7 [0.5 - 5.7]               |
| Oxcarbazepine                            | 2.1 [0.3 - 14.0]              | 2.0 [0.3 - 13.9]              |
| Pregabalin                               | 1.3 [0.5 - 3.3]               | 1.2 [0.5 - 3.1]               |
| Topiramate                               | 0.3 [0.0 - 4.8]               | 0.3 [0.0 - 4.5]               |
| <b><i>Valproic acid</i></b>              | <b><i>4.4 [2.1 - 9.2]</i></b> | <b><i>4.5 [2.1 - 9.6]</i></b> |
| <b>Mental retardation</b>                |                               |                               |
| Carbamazepine                            | 0.6 [0.1 - 2.9]               | 0.6 [0.1 - 3.0]               |
| Clonazepam                               | 0.3 [0.1 - 1.2]               | 0.3 [0.1 - 1.2]               |
| Gabapentin                               | N/A                           | N/A                           |
| Levetiracetam                            | 0.3 [0.0 - 2.5]               | 0.4 [0.0 - 2.6]               |
| Oxcarbazepine                            | N/A                           | N/A                           |
| Pregabalin                               | 0.6 [0.2 - 1.8]               | 0.6 [0.2 - 1.7]               |
| Topiramate                               | 0.5 [0.1 - 3.3]               | 0.5 [0.1 - 3.3]               |
| <b><i>Valproic acid</i></b>              | <b><i>3.0 [1.5 - 6.1]</i></b> | <b><i>3.1 [1.5 - 6.2]</i></b> |
| <b>Visits to a speech therapist</b>      |                               |                               |
| Carbamazepine                            | 0.9 [0.6 - 1.4]               | 1.0 [0.6 - 1.4]               |
| Clonazepam                               | 0.8 [0.6 - 1.0]               | 0.8 [0.6 - 1.1]               |
| Gabapentin                               | 0.7 [0.4 - 1.2]               | 0.7 [0.4 - 1.2]               |
| Levetiracetam                            | 0.7 [0.4 - 1.1]               | 0.7 [0.5 - 1.1]               |
| Oxcarbazepine                            | 1.3 [0.7 - 2.4]               | 1.3 [0.7 - 2.5]               |
| <b><i>Pregabalin</i></b>                 | <b><i>0.7 [0.5 - 0.9]</i></b> | <b><i>0.7 [0.5 - 1.0]</i></b> |
| Topiramate                               | 1.2 [0.8 - 1.8]               | 1.2 [0.8 - 1.8]               |
| <b><i>Valproic acid</i></b>              | <b><i>1.5 [1.2 - 1.9]</i></b> | <b><i>1.5 [1.2 - 1.9]</i></b> |

Abbreviations: AED = antiepileptic drug; HR = hazard ratio; N/A = not applicable

Lines marked in bold and italics correspond to HRs for which the 95% CI does not include 1.

<sup>a</sup> adjusted for all covariates except proxies for smoking and alcohol

<sup>b</sup> adjusted for all covariates except gestational age and birth weight

1  
2  
3  
4  
5  
6  
7  
8  
9  
10  
11  
12  
13  
14  
15  
16  
17  
18  
19  
20  
21  
22  
23  
24  
25  
26  
27  
28  
29  
30  
31  
32  
33  
34  
35  
36  
37  
38  
39  
40  
41  
42  
43  
44  
45  
46

**Supplementary Table 6. Baseline characteristics according to the dose of valproic acid dispensed during pregnancy - main analysis and sensitivity analysis restricted to women considered to be treated for epilepsy**

|                                                      |           | Lamotrigine -<br>all indications | Lamotrigine -<br>epilepsy | Valproic acid |       |       |                               |                               |       |                               |                               |       |
|------------------------------------------------------|-----------|----------------------------------|---------------------------|---------------|-------|-------|-------------------------------|-------------------------------|-------|-------------------------------|-------------------------------|-------|
|                                                      |           |                                  |                           | [0-700 mg]    |       |       | [700-1500 mg]                 |                               |       | ≥1500 mg                      |                               |       |
|                                                      |           |                                  |                           | N (%)         | N (%) | N (%) | Chi <sup>2</sup> <sup>a</sup> | Chi <sup>2</sup> <sup>b</sup> | N (%) | Chi <sup>2</sup> <sup>a</sup> | Chi <sup>2</sup> <sup>b</sup> | N (%) |
| Number of exposed pregnancies                        |           | 2,916                            | 2,108                     | 308           |       |       | 520                           |                               |       | 163                           |                               |       |
| Maternal age<br>at birth (years)                     | < 25      | 431 (14.8)                       | 349 (16.6)                | 38 (12.3)     |       |       | 83 (16.0)                     |                               |       | 16 (9.8)                      |                               |       |
|                                                      | [25 - 30[ | 927 (31.8)                       | 715 (33.9)                | 81 (26.3)     | *     | **    | 135 (26.0)                    | **                            | ***   | 43 (26.4)                     | ***                           | ***   |
|                                                      | [30 - 35[ | 980 (33.6)                       | 679 (32.2)                | 107 (34.7)    |       |       | 160 (30.8)                    |                               |       | 43 (26.4)                     |                               |       |
|                                                      | ≥ 35      | 578 (19.8)                       | 365 (17.3)                | 82 (26.6)     |       |       | 142 (27.3)                    |                               |       | 61 (37.4)                     |                               |       |
| Eligibility for CMU-C                                |           | 461 (15.8)                       | 340 (16.1)                | 94 (30.5)     | ***   | ***   | 162 (31.2)                    | ***                           | ***   | 55 (33.7)                     | ***                           | ***   |
| Hospitalization for epilepsy                         |           | N/A                              | 171 (8.1)                 | 5 (1.6)       | N/A   | ***   | 12 (2.3)                      | N/A                           | ***   | 5 (3.1)                       | N/A                           | *     |
| History of mental and behavioral disorders           |           | 368 (12.6)                       | 150 (7.1)                 | 28 (9.1)      | NS    | NS    | 49 (9.4)                      | *                             | NS    | 19 (11.7)                     | NS                            | *     |
| Proxy for alcohol intake                             |           | 35 (1.2)                         | 18 (0.9)                  | 4 (1.3)       | NS    | NS    | 12 (2.3)                      | *                             | *     | 6 (3.7)                       | *                             | **    |
| Proxy for smoking                                    |           | 311 (10.7)                       | 204 (9.7)                 | 33 (10.7)     | NS    | NS    | 69 (13.3)                     | NS                            | *     | 34 (20.9)                     | ***                           | ***   |
| Folic acid supplementation                           |           | 2,026 (69.5)                     | 1,537 (72.9)              | 137 (44.5)    | ***   | ***   | 300 (57.7)                    | ***                           | ***   | 88 (54.0)                     | ***                           | ***   |
| SSRIs during pregnancy                               |           | 210 (7.2)                        | 55 (2.6)                  | 8 (2.6)       | *     | NS    | 15 (2.9)                      | *                             | NS    | 10 (6.1)                      | NS                            | *     |
| History of antipsychotic use                         |           | 227 (7.8)                        | 40 (1.9)                  | 16 (5.2)      | NS    | **    | 22 (4.2)                      | *                             | *     | 11 (6.7)                      | NS                            | ***   |
| Number of<br>psychiatric<br>medications <sup>c</sup> | 0         | 1,641 (56.3)                     | 1,286 (61.0)              | 209 (67.9)    |       |       | 351 (67.5)                    |                               |       | 93 (57.1)                     |                               |       |
|                                                      | 1         | 669 (22.9)                       | 522 (24.8)                | 50 (16.2)     |       |       | 95 (18.3)                     |                               |       | 35 (21.5)                     |                               |       |
|                                                      | 2         | 258 (8.8)                        | 167 (7.9)                 | 26 (8.4)      | *     | *     | 28 (5.4)                      | ***                           | ***   | 13 (8.0)                      | NS                            | **    |
|                                                      | 3-4       | 211 (7.2)                        | 91 (4.3)                  | 14 (4.5)      |       |       | 21 (4.0)                      |                               |       | 10 (6.1)                      |                               |       |
|                                                      | ≥ 5       | 137 (4.7)                        | 42 (2.0)                  | 9 (2.9)       |       |       | 25 (4.8)                      |                               |       | 12 (7.4)                      |                               |       |

**Supplementary Table 6. Baseline characteristics according to the dose of valproic acid dispensed during pregnancy - main analysis and sensitivity analysis restricted to women considered to be treated for epilepsy (continued)**

|                                         |                 | Lamotrigine -<br>all indications | Lamotrigine -<br>epilepsy | Valproic acid |                               |                               |               |                               |                               |            |                               |                               |
|-----------------------------------------|-----------------|----------------------------------|---------------------------|---------------|-------------------------------|-------------------------------|---------------|-------------------------------|-------------------------------|------------|-------------------------------|-------------------------------|
|                                         |                 |                                  |                           | [0-700 mg]    |                               |                               | [700-1500 mg] |                               |                               | ≥1500 mg   |                               |                               |
|                                         |                 | N (%)                            | N (%)                     | N (%)         | Chi <sup>2</sup> <sup>a</sup> | Chi <sup>2</sup> <sup>b</sup> | N (%)         | Chi <sup>2</sup> <sup>a</sup> | Chi <sup>2</sup> <sup>b</sup> | N (%)      | Chi <sup>2</sup> <sup>a</sup> | Chi <sup>2</sup> <sup>b</sup> |
| Gestational<br>age (weeks<br>after LMP) | < 32            | 11 (0.4)                         | 8 (0.4)                   | 1 (0.3)       |                               |                               | 4 (0.8)       |                               |                               | 2 (1.2)    |                               |                               |
|                                         | [32 - 35[       | 42 (1.4)                         | 32 (1.5)                  | 8 (2.6)       | NS                            | NS                            | 8 (1.5)       | NS                            | NS                            | 3 (1.8)    | NS                            | NS                            |
|                                         | [35 - 37[       | 129 (4.4)                        | 91 (4.3)                  | 13 (4.2)      |                               |                               | 23 (4.4)      |                               |                               | 9 (5.5)    |                               |                               |
|                                         | ≥ 37            | 2,734 (93.8)                     | 1,977 (93.8)              | 286 (92.9)    |                               |                               | 485 (93.3)    |                               |                               | 149 (91.4) |                               |                               |
| Gender (male)                           |                 | 1,524 (52.3)                     | 1,115 (52.9)              | 161 (52.3)    | NS                            | NS                            | 257 (49.4)    | NS                            | NS                            | 78 (47.9)  | NS                            | NS                            |
| Birth weight                            | < 2,500         | 179 (6.1)                        | 128 (6.1)                 | 21 (6.8)      | NS                            | NS                            | 48 (9.2)      |                               |                               | 19 (11.7)  |                               |                               |
|                                         | [2,500 - 3,000[ | 630 (21.6)                       | 460 (21.8)                | 71 (23.1)     |                               |                               | 119 (22.9)    | *                             | *                             | 37 (22.7)  | *                             | *                             |
|                                         | [3,000 - 3,500[ | 1,196 (41.0)                     | 872 (41.4)                | 112 (36.4)    |                               |                               | 212 (40.8)    |                               |                               | 65 (39.9)  |                               |                               |
|                                         | ≥ 3,500         | 911 (31.2)                       | 648 (30.7)                | 104 (33.8)    |                               |                               | 141 (27.1)    |                               |                               | 42 (25.8)  |                               |                               |

Abbreviations: AED = antiepileptic drug; Chi<sup>2</sup> = Chi-squared test; CMU- C = complementary universal health insurance for low-income people; SSRIs = selective serotonin reuptake inhibitors; LMP = last menstrual period; N/A = not applicable

<sup>a</sup> compared to women exposed to lamotrigine regardless of indication

<sup>b</sup> compared to women exposed to lamotrigine and considered to be treated for epilepsy

<sup>c</sup> number of 5th level ATC classes of psychiatric medications to whom mothers were exposed in the year before pregnancy

\*\*\* p <0.0001; \*\* p <0.001; \* p <0.05; NS: Not Significant

**Supplementary Figure 1. Differences in baseline covariates between children exposed to lamotrigine (reference group) and children exposed to the other AEDs studied before (grey dots) and after IPTW (black dots) - women considered to be treated for epilepsy**

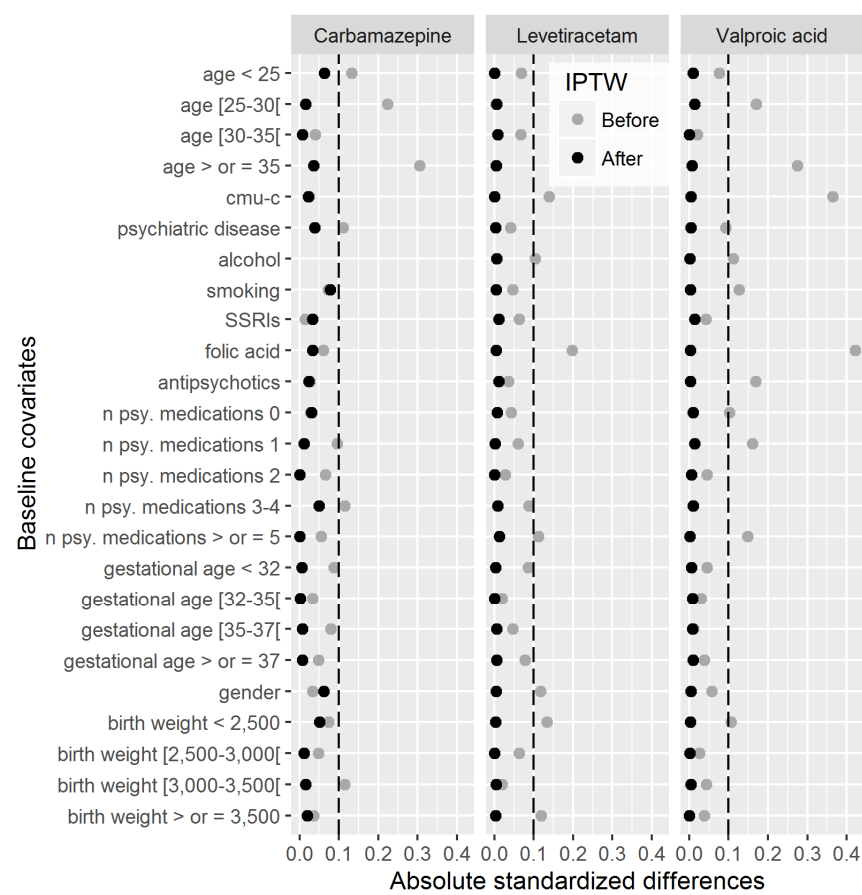

Abbreviations: AED = antiepileptic drug; IPTW = inverse probability of treatment weighting; cmu-c = complementary universal health insurance; n.psy. medications = number of ATC classes of psychiatric medications

**Supplementary Figure 2. Differences in baseline covariates between children exposed to lamotrigine (reference group) and children exposed to the other AEDs studied before (grey dots) and after IPTW (black dots) - exposure limited to dispensing during pregnancy**

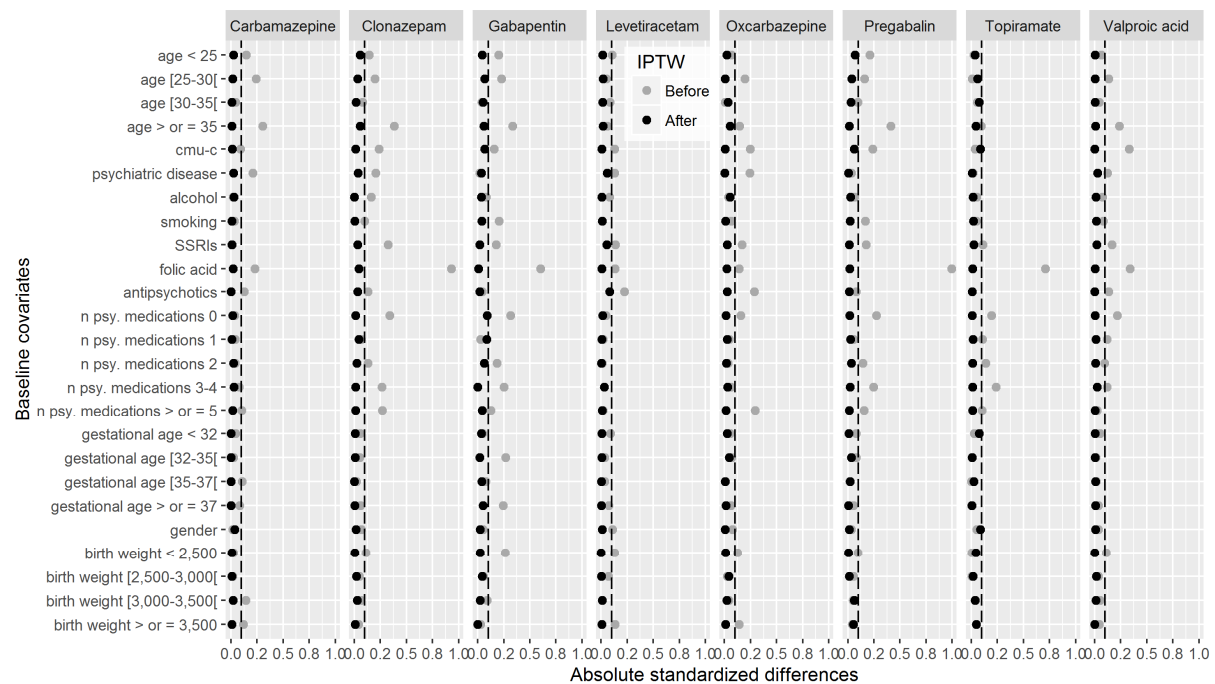

Abbreviations: AED = antiepileptic drug; IPTW = inverse probability of treatment weighting; cmu-c = complementary universal health insurance; n.psy. medications = number of ATC classes of psychiatric medications

STROBE Statement—Checklist of items that should be included in reports of *cohort studies*

|                              | Item No | Recommendation                                                                                                                                                                                                                                                                                                                                                                                                |                                             |
|------------------------------|---------|---------------------------------------------------------------------------------------------------------------------------------------------------------------------------------------------------------------------------------------------------------------------------------------------------------------------------------------------------------------------------------------------------------------|---------------------------------------------|
| <b>Title and abstract</b>    | 1       | (a) Indicate the study's design with a commonly used term in the title or the abstract<br>(b) Provide in the abstract an informative and balanced summary of what was done and what was found                                                                                                                                                                                                                 | p. 1, 5, 6<br>p. 3                          |
| <b>Introduction</b>          |         |                                                                                                                                                                                                                                                                                                                                                                                                               |                                             |
| Background/rationale         | 2       | Explain the scientific background and rationale for the investigation being reported                                                                                                                                                                                                                                                                                                                          | p. 5                                        |
| Objectives                   | 3       | State specific objectives, including any prespecified hypotheses                                                                                                                                                                                                                                                                                                                                              | p. 5                                        |
| <b>Methods</b>               |         |                                                                                                                                                                                                                                                                                                                                                                                                               |                                             |
| Study design                 | 4       | Present key elements of study design early in the paper                                                                                                                                                                                                                                                                                                                                                       | p. 6                                        |
| Setting                      | 5       | Describe the setting, locations, and relevant dates, including periods of recruitment, exposure, follow-up, and data collection                                                                                                                                                                                                                                                                               | p. 6, 7, 8                                  |
| Participants                 | 6       | (a) Give the eligibility criteria, and the sources and methods of selection of participants. Describe methods of follow-up<br>(b) For matched studies, give matching criteria and number of exposed and unexposed                                                                                                                                                                                             | p. 6, 7, 8<br>n/a                           |
| Variables                    | 7       | Clearly define all outcomes, exposures, predictors, potential confounders, and effect modifiers. Give diagnostic criteria, if applicable                                                                                                                                                                                                                                                                      | p. 7, 8, 9                                  |
| Data sources/<br>measurement | 8*      | For each variable of interest, give sources of data and details of methods of assessment (measurement). Describe comparability of assessment methods if there is more than one group                                                                                                                                                                                                                          | p. 8                                        |
| Bias                         | 9       | Describe any efforts to address potential sources of bias                                                                                                                                                                                                                                                                                                                                                     | p. 9, 10                                    |
| Study size                   | 10      | Explain how the study size was arrived at                                                                                                                                                                                                                                                                                                                                                                     | p. 7                                        |
| Quantitative variables       | 11      | Explain how quantitative variables were handled in the analyses. If applicable, describe which groupings were chosen and why                                                                                                                                                                                                                                                                                  | p. 9                                        |
| Statistical methods          | 12      | (a) Describe all statistical methods, including those used to control for confounding<br>(b) Describe any methods used to examine subgroups and interactions<br>(c) Explain how missing data were addressed<br>(d) If applicable, explain how loss to follow-up was addressed<br>(e) Describe any sensitivity analyses                                                                                        | p. 9<br>p. 10<br>p. 7<br>p. 8<br>p. 10      |
| <b>Results</b>               |         |                                                                                                                                                                                                                                                                                                                                                                                                               |                                             |
| Participants                 | 13*     | (a) Report numbers of individuals at each stage of study—eg numbers potentially eligible, examined for eligibility, confirmed eligible, included in the study, completing follow-up, and analysed<br>(b) Give reasons for non-participation at each stage<br>(c) Consider use of a flow diagram                                                                                                               | p. 10, 29<br>n/a<br>p. 29                   |
| Descriptive data             | 14*     | (a) Give characteristics of study participants (eg demographic, clinical, social) and information on exposures and potential confounders<br>(b) Indicate number of participants with missing data for each variable of interest<br>(c) Summarise follow-up time (eg, average and total amount)                                                                                                                | p. 10, 11<br>22, 23<br>n/a<br>p. 10         |
| Outcome data                 | 15*     | Report numbers of outcome events or summary measures over time                                                                                                                                                                                                                                                                                                                                                | p. 25, 27, 28                               |
| Main results                 | 16      | (a) Give unadjusted estimates and, if applicable, confounder-adjusted estimates and their precision (eg, 95% confidence interval). Make clear which confounders were adjusted for and why they were included<br>(b) Report category boundaries when continuous variables were categorized<br>(c) If relevant, consider translating estimates of relative risk into absolute risk for a meaningful time period | p. 11, 12<br>25, 27, 28<br>p. 12, 28<br>n/a |

|                          |    |                                                                                                                                                                            |               |
|--------------------------|----|----------------------------------------------------------------------------------------------------------------------------------------------------------------------------|---------------|
| Other analyses           | 17 | Report other analyses done—eg analyses of subgroups and interactions, and sensitivity analyses                                                                             | p. 11, 12, 27 |
| <b>Discussion</b>        |    |                                                                                                                                                                            |               |
| Key results              | 18 | Summarise key results with reference to study objectives                                                                                                                   | p. 12, 13     |
| Limitations              | 19 | Discuss limitations of the study, taking into account sources of potential bias or imprecision. Discuss both direction and magnitude of any potential bias                 | p. 14, 15, 16 |
| Interpretation           | 20 | Give a cautious overall interpretation of results considering objectives, limitations, multiplicity of analyses, results from similar studies, and other relevant evidence | p. 14, 15, 16 |
| Generalisability         | 21 | Discuss the generalisability (external validity) of the study results                                                                                                      | n/a           |
| <b>Other information</b> |    |                                                                                                                                                                            |               |
| Funding                  | 22 | Give the source of funding and the role of the funders for the present study and, if applicable, for the original study on which the present article is based              | p. 17         |

\*Give information separately for exposed and unexposed groups.

**Note:** An Explanation and Elaboration article discusses each checklist item and gives methodological background and published examples of transparent reporting. The STROBE checklist is best used in conjunction with this article (freely available on the Web sites of PLoS Medicine at <http://www.plosmedicine.org/>, Annals of Internal Medicine at <http://www.annals.org/>, and Epidemiology at <http://www.epidem.com/>). Information on the STROBE Initiative is available at <http://www.strobe-statement.org>.

# BMJ Open

## **Risk of early neurodevelopmental outcomes associated with prenatal exposure to the antiepileptic drugs most commonly used during pregnancy: a French nationwide population-based cohort study**

|                                 |                                                                                                                                                                                                                                                                                                                                                                                                                                                                                                                                                                                                                                                                                                                                                                                                                                                                                                                                                                                                                                                                                                                                                                                                                                                                                                                                                                                                                                                                                                                                                                                                                                         |
|---------------------------------|-----------------------------------------------------------------------------------------------------------------------------------------------------------------------------------------------------------------------------------------------------------------------------------------------------------------------------------------------------------------------------------------------------------------------------------------------------------------------------------------------------------------------------------------------------------------------------------------------------------------------------------------------------------------------------------------------------------------------------------------------------------------------------------------------------------------------------------------------------------------------------------------------------------------------------------------------------------------------------------------------------------------------------------------------------------------------------------------------------------------------------------------------------------------------------------------------------------------------------------------------------------------------------------------------------------------------------------------------------------------------------------------------------------------------------------------------------------------------------------------------------------------------------------------------------------------------------------------------------------------------------------------|
| Journal:                        | <i>BMJ Open</i>                                                                                                                                                                                                                                                                                                                                                                                                                                                                                                                                                                                                                                                                                                                                                                                                                                                                                                                                                                                                                                                                                                                                                                                                                                                                                                                                                                                                                                                                                                                                                                                                                         |
| Manuscript ID                   | bmjopen-2019-034829.R1                                                                                                                                                                                                                                                                                                                                                                                                                                                                                                                                                                                                                                                                                                                                                                                                                                                                                                                                                                                                                                                                                                                                                                                                                                                                                                                                                                                                                                                                                                                                                                                                                  |
| Article Type:                   | Original research                                                                                                                                                                                                                                                                                                                                                                                                                                                                                                                                                                                                                                                                                                                                                                                                                                                                                                                                                                                                                                                                                                                                                                                                                                                                                                                                                                                                                                                                                                                                                                                                                       |
| Date Submitted by the Author:   | 14-Feb-2020                                                                                                                                                                                                                                                                                                                                                                                                                                                                                                                                                                                                                                                                                                                                                                                                                                                                                                                                                                                                                                                                                                                                                                                                                                                                                                                                                                                                                                                                                                                                                                                                                             |
| Complete List of Authors:       | <p>Blotière, Pierre-Olivier; French National Health Insurance (CNAM), Department of Public Health Studies; Université de Lorraine, Université Paris-Descartes, Apemac, EA 4360</p> <p>Miranda, Sara; French National Agency for Medicines and Health Products Safety, Department of Epidemiology of Health Products</p> <p>Weill, Alain; French National Health Insurance (CNAM), Department of Public Health Studies</p> <p>Mikaeloff, Yann; Assistance Publique-Hôpitaux de Paris, Hôpital Bicêtre, Unité de Rééducation Neurologique Infantile; CESP, Faculté de médecine-Université Paris-Sud, Faculté de médecine-UVSQ, INSERM, Université Paris-Saclay</p> <p>Peyre, Hugo; Laboratoire de Sciences Cognitives et Psycholinguistique, Ecole Normale Supérieure, EHESS, CNRS, PSL University; INSERM UMR 1141, Paris Diderot University; Department of Child and Adolescent Psychiatry, Robert Debré Hospital, APHP</p> <p>Ramus, Franck; Laboratoire de Sciences Cognitives et Psycholinguistique, Ecole Normale Supérieure, EHESS, CNRS, PSL University</p> <p>MAHMOUD, ZUREIK; French National Agency for Medicines and Health Products Safety, Department of Epidemiology of Health Products; Versailles Saint-Quentin-en-Yvelines University</p> <p>Coste, Joël; French National Health Insurance (CNAM), Department of Public Health Studies; Biostatistics and Epidemiology Unit, Hôtel-Dieu Hospital, Assistance Publique-Hôpitaux de Paris, and Paris Descartes University</p> <p>DRAY-SPIRA, ROSEMARY; French National Agency for Medicines and Health Products Safety, Department of Epidemiology of Health Products</p> |
| <b>Primary Subject Heading</b>: | Neurology                                                                                                                                                                                                                                                                                                                                                                                                                                                                                                                                                                                                                                                                                                                                                                                                                                                                                                                                                                                                                                                                                                                                                                                                                                                                                                                                                                                                                                                                                                                                                                                                                               |
| Secondary Subject Heading:      | Public health, Epidemiology                                                                                                                                                                                                                                                                                                                                                                                                                                                                                                                                                                                                                                                                                                                                                                                                                                                                                                                                                                                                                                                                                                                                                                                                                                                                                                                                                                                                                                                                                                                                                                                                             |
| Keywords:                       | Epilepsy < NEUROLOGY, Paediatric neurology < PAEDIATRICS, Child & adolescent psychiatry < PSYCHIATRY                                                                                                                                                                                                                                                                                                                                                                                                                                                                                                                                                                                                                                                                                                                                                                                                                                                                                                                                                                                                                                                                                                                                                                                                                                                                                                                                                                                                                                                                                                                                    |
|                                 |                                                                                                                                                                                                                                                                                                                                                                                                                                                                                                                                                                                                                                                                                                                                                                                                                                                                                                                                                                                                                                                                                                                                                                                                                                                                                                                                                                                                                                                                                                                                                                                                                                         |

1  
2  
3  
4  
5  
6  
7  
8  
9  
10  
11  
12  
13  
14  
15  
16  
17  
18  
19  
20  
21  
22  
23  
24  
25  
26  
27  
28  
29  
30  
31  
32  
33  
34  
35  
36  
37  
38  
39  
40  
41  
42  
43  
44  
45  
46  
47  
48  
49  
50  
51  
52  
53  
54  
55  
56  
57  
58  
59  
60

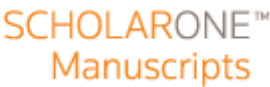



I, the Submitting Author has the right to grant and does grant on behalf of all authors of the Work (as defined in the below author licence), an exclusive licence and/or a non-exclusive licence for contributions from authors who are: i) UK Crown employees; ii) where BMJ has agreed a CC-BY licence shall apply, and/or iii) in accordance with the terms applicable for US Federal Government officers or employees acting as part of their official duties; on a worldwide, perpetual, irrevocable, royalty-free basis to BMJ Publishing Group Ltd ("BMJ") its licensees and where the relevant Journal is co-owned by BMJ to the co-owners of the Journal, to publish the Work in this journal and any other BMJ products and to exploit all rights, as set out in our [licence](#).

The Submitting Author accepts and understands that any supply made under these terms is made by BMJ to the Submitting Author unless you are acting as an employee on behalf of your employer or a postgraduate student of an affiliated institution which is paying any applicable article publishing charge ("APC") for Open Access articles. Where the Submitting Author wishes to make the Work available on an Open Access basis (and intends to pay the relevant APC), the terms of reuse of such Open Access shall be governed by a Creative Commons licence – details of these licences and which [Creative Commons](#) licence will apply to this Work are set out in our licence referred to above.

Other than as permitted in any relevant BMJ Author's Self Archiving Policies, I confirm this Work has not been accepted for publication elsewhere, is not being considered for publication elsewhere and does not duplicate material already published. I confirm all authors consent to publication of this Work and authorise the granting of this licence.

Risk of early neurodevelopmental outcomes associated with prenatal exposure to the antiepileptic drugs most commonly used during pregnancy: a French nationwide population-based cohort study

Authors: Pierre-Olivier Blotière, PhD<sup>1,2</sup>; Sara Miranda, PharmD<sup>3</sup>; Alain Weill, MD<sup>1</sup>; Yann Mikaeloff, MD, PhD<sup>4</sup>; Hugo Peyre, MD, PhD<sup>5,6,7</sup>; Franck Ramus, PhD<sup>5</sup>; Mahmoud Zureik, MD, PhD<sup>3,8</sup>; Joël Coste, MD, PhD<sup>1,9</sup>; Rosemary Dray-Spira, MD, PhD<sup>3</sup>

<sup>1</sup> Department of Public Health Studies, French National Health Insurance (CNAM), Paris, France

<sup>2</sup> Université de Lorraine, Université Paris-Descartes, Apemac, EA 4360, Nancy, France

<sup>3</sup> Department of Epidemiology of Health Products, French National Agency for Medicines and Health Products Safety, Saint-Denis, France

<sup>4</sup> Assistance Publique-Hôpitaux de Paris, Hôpital Bicêtre, Unité de Rééducation Neurologique Infantile, Bicêtre; CESP, Faculté de médecine-Université Paris-Sud, Faculté de médecine-UVSQ, INSERM, Université Paris-Saclay, 94805, Villejuif, France

<sup>5</sup> Laboratoire de Sciences Cognitives et Psycholinguistique, Ecole Normale Supérieure, EHESS, CNRS, PSL University, Paris, France

<sup>6</sup> INSERM UMR 1141, Paris Diderot University, Paris, France

<sup>7</sup> Department of Child and Adolescent Psychiatry, Robert Debré Hospital, APHP, Paris, France

<sup>8</sup> Versailles Saint-Quentin University, France

<sup>9</sup> Biostatistics and Epidemiology Unit, Hôtel-Dieu Hospital, Assistance Publique-Hôpitaux de Paris, and Paris Descartes University, Paris, France

Corresponding Author:

Pierre-Olivier Blotière

French National Health Insurance (CNAM)

50 Avenue du Professeur André Lemierre

75986 Paris Cedex 20, France.

Phone +33172601982

pierre-olivier.blotiere@assurance-maladie.fr

ORCID: 0000-0002-6857-6781

Manuscript word count: 3,344

Abstract

Objectives: To assess the association between prenatal exposure to monotherapy with the antiepileptic drugs (AEDs) most commonly used during pregnancy and the risk of various neurodevelopmental outcomes compared to lamotrigine.

Design: Nationwide population-based cohort study.

Setting: French national health care databases.

Participants: Children born alive between 2011 and 2014 and prenatally exposed to AED monotherapy.

Primary and secondary outcome measures: Outcomes included neurodevelopmental disorders (NDD), defined with ICD-10 codes F70-F98, – pervasive developmental disorders (PDD, F84) and mental retardation (MR, F70-F79) were studied separately – and visits to speech therapists. The reference group comprised children prenatally exposed to lamotrigine. Children were followed until outcome, loss to follow-up, death or 31 December 2016. We performed inverse probability of treatment weighting analyses using the propensity score, which included maternal and infant characteristics. Hazard ratios (HRs) were calculated using Cox models.

Results: The cohort comprised 9,034 children, 2,916 of which were exposed to lamotrigine, 1,627 to pregabalin, 1,246 to clonazepam, 991 to valproic acid (VPA), 621 to levetiracetam, 502 to carbamazepine, 477 to topiramate, 378 to gabapentin and 143 to oxcarbazepine. None of these AEDs, except VPA, were associated with an increased risk of any of the four neurodevelopmental outcomes investigated. Exposure to VPA was associated with increased risks of NDDs (HR=2.7[1.8-4.0]), PDD (HR=4.4[2.1-9.3]), MR (HR=3.1[1.5-6.2]) and visits to speech therapists (HR=1.5[1.1-1.9]), with a dose-response relationship.

Conclusions: No increased risk of any of the neurodevelopmental outcomes investigated in this study was observed with prenatal exposure to levetiracetam, pregabalin, oxcarbazepine, topiramate, gabapentin, clonazepam or carbamazepine, compared to lamotrigine. However, this study corroborates the well-known association between maternal use of VPA during pregnancy and the risk of neurodevelopmental disorders in the offspring. Longer follow-up is necessary to confirm these findings.

Keywords: antiepileptic drugs; pregnancy; neurodevelopmental disorders; health care databases; France

#### Strengths and limitations of this study

This nationwide cohort study based on the French health care databases is the largest study to date to assess the association between AED exposure during pregnancy and neurodevelopmental outcomes in the offspring.

This study investigated a wide range of AEDs, including some drugs for which little or no information is available in the literature.

Although residual confounding by unmeasured covariates cannot be excluded, the choice of lamotrigine as the reference group and the sensitivity analysis restricted to women considered to be treated for epilepsy should mitigate confounding.

The maximum length of follow-up was 6 years, allowing only early diagnoses of neurodevelopmental disorders to be identified.

1  
2  
3  
4  
5  
6  
7  
8  
9  
10  
11  
12  
13  
14  
15  
16  
17  
18  
19  
20  
21  
22  
23  
24  
25  
26  
27  
28  
29  
30  
31  
32  
33  
34  
35  
36  
37  
38  
39  
40  
41  
42  
43  
44  
45  
46  
47  
48  
49  
50  
51  
52  
53  
54  
55  
56  
57  
58  
59  
60

**INTRODUCTION**

Antiepileptic drugs (AEDs) are commonly prescribed during pregnancy to treat epilepsy and various other conditions, such as neuropathic pain syndromes, psychiatric disorders and chronic migraine[1]: between 0.4 and 0.7% of women are exposed to AEDs during pregnancy in Europe,[2,3] while this prevalence is as high as 2% in the US.[4]

Some of these AEDs are known to be teratogens.[5] Of all AEDs, prenatal exposure to valproic acid has been most clearly associated with poor neurodevelopmental outcomes,[6] which led the US Food and Drug Administration to issue a warning in 2011[7] and stringent guidance in 2013 for clinicians prescribing valproic acid to pregnant women or women of childbearing potential.[8] The European Medicines Agency also strengthened warnings on the use of valproate-containing medicines in women and girls in 2014[9] and issued a ban in 2018 on the use of such medicines during pregnancy for migraine or bipolar disorder, and for epilepsy except when no other effective treatment is available.[10]

Lamotrigine has generally been associated with favorable neurodevelopmental outcomes.[6] Discordant but mainly reassuring data have been published for carbamazepine, while evidence for levetiracetam and topiramate remains limited and almost no information is available concerning the other AEDs, particularly clonazepam, oxcarbazepine, gabapentin and pregabalin.[6] Furthermore, most of the studies conducted to date have been based on small sample sizes and may be prone to selection bias.

We therefore conducted a large-scale nationwide cohort study using the French health care databases to assess various early neurodevelopmental outcomes among children prenatally exposed to monotherapy with individual AEDs compared to lamotrigine-exposed children.

## METHODS

### Study design and data sources

The French national health insurance database (SNIIRAM) and the French hospital discharge database (PMSI) linked by a unique patient identifier were used to conduct this nationwide population-based cohort study.[11]

The DCIR database contains all individualized and anonymous health care claims reimbursed by French National Health Insurance, in particular all dispensed drugs and medical procedures in the outpatient setting. The DCIR database also collects patient data such as age, gender, vital status and eligibility for complementary universal health insurance (CMU-C), which provides free access to health care for low-income people.[12] Eligibility for 100% health insurance coverage for serious and costly long-term diseases (LTD) is also recorded in the DCIR database.

The PMSI database provides detailed medical information on all admissions to public and private hospitals in France, including primary, related and associated discharge diagnoses, medical procedures and data related to pregnancy such as gestational ages and birth weights.

Drugs are coded according to the Anatomical Therapeutic Chemical (ATC) classification and medical procedures are coded according to the French medical classification of clinical procedures (CCAM). LTD and hospital discharge diagnoses are coded according to the International Classification of Diseases, 10th Revision (ICD-10).

This linkage has previously been used to conduct epidemiological studies in pregnancy research.[3,13–15]

**Study population**

All live births between January 2011 and December 2014 were eligible for inclusion. These live births were identified by using a published algorithm based on discharge diagnoses and medical procedures indicative of completion of pregnancy.[3]

The mother had to be enrolled in the national health insurance general scheme (75% of the French population), during the penultimate year before pregnancy. Pregnancies that could not be linked to neonatal data and twin pregnancies were excluded, as well as pregnancies for which the child had no valid identifier allowing follow-up and pregnancies for which gestational ages or birth weights were not available. Children with a hospital discharge diagnosis of brain malformation documented at birth were also excluded (see supplementary Table 1 for ICD-10 codes). For each woman, only the first birth occurring during the study period was considered.

Finally, only pregnancies exposed to AED monotherapy were included in the study population.

These exclusion criteria are reported in the study population flowchart (Figure 1).

**Patient and Public Involvement**

Patients or the public were not involved in the design and the conduct of the study.

**Exposure**

All AEDs were studied (supplementary Table 2). Women were considered to be exposed during the 30 days following dispensing of an AED, as AED prescriptions are dispensed with a 30-day supply in France. Women were therefore exposed during pregnancy when an AED had been dispensed between 30 days before the beginning of pregnancy and the end of

pregnancy. Monotherapy was defined as the absence of any other AED dispensed during the same period. Results related to AEDs rarely used as monotherapy during pregnancy (< 100 exposed pregnancies) were not reported. The reference group included pregnant women exposed to lamotrigine monotherapy for the following reason: active-comparator designs minimize confounding by indication compared to the use of an unexposed control group[16] ; lamotrigine is the most commonly used AED in France for the treatment of epilepsy ; prenatal exposure to lamotrigine has been mostly shown to be associated with favorable neurodevelopmental outcomes ; comparing all individual AEDs to lamotrigine addresses a clinically relevant question: which is the safest AED?

Mean daily doses were calculated by dividing cumulative doses by the number of days covered. Cumulative doses were assessed by equally distributing the dose of AED dispensed over the 30 days following dispensing and then by adding these daily doses overlapping with the pregnancy period. The number of days covered was defined as the sum of the 30-day periods of exposure corresponding to each refill minus the number of days of overlap between two consecutive refills. Only the days overlapping with the pregnancy period were taken into account.

## Outcomes

Four outcomes were considered, based on the literature but also on their availability in the French health care databases. The primary outcomes were hospitalization or LTD for neurodevelopmental disorders (ICD-10 diagnosis codes F70 to F98), but also for two specific subcategories: pervasive developmental disorders (F84) and mental retardation (F70-F79). The secondary outcome was “visits to a speech therapist”, as a proxy for communication-related disorders.

## Follow-up

Children were followed from birth until any of the predefined outcomes, loss to follow-up (more than one year with no reimbursement), death from any cause or end of the study period defined as the 31<sup>st</sup> December 2016, whichever came first.

**Covariates**

Potential confounders related to the mother and considered in this study included sociodemographic covariates (maternal age at birth and eligibility for CMU-C), as well as comedications and comorbidities. Comedications included (1) pre-conception folic acid supplementation, defined as at least one dispensing between one month before pregnancy and 3 months after the start of pregnancy, (2) exposure to selective serotonin reuptake inhibitors (SSRIs) during pregnancy, (3) exposure to antipsychotics in the year before pregnancy, (4) a proxy for severity of mental disorders (the number of 5<sup>th</sup> level ATC classes of psychiatric medications dispensed in the year before pregnancy). History of mental and behavioral disorders not related to alcohol or smoking, which was identified by using hospital discharge and LTD diagnoses, was also considered to be potential confounder. Alcohol intake and smoking were not directly available in the databases and proxies were calculated using modified versions of previously published algorithms.[17] These proxies were constructed on the basis of hospital discharge diagnoses, LTD diagnoses and the child’s hospital discharge diagnoses at birth. We also used specific drug reimbursements for alcohol intake and nicotine replacement therapy reimbursements for smoking. Potential confounders related to the child and considered in this study were gender, gestational age and birth weight.

All drugs and ICD-10 codes related to hospital discharge and LTD diagnoses used to define covariates are presented in supplementary Table 1.

**Statistical analyses**

Baseline covariates were compared between pregnancies exposed to each AED studied and lamotrigine-exposed pregnancies using  $\chi^2$  tests. Number of events, crude event rates and crude incidence rate ratios (IRRs) were calculated. Potential confounders were controlled for by performing inverse probability of treatment weighting (IPTW) analyses using the propensity score. These analyses were conducted separately according to the type of AED. Propensity scores were determined by using logistic regression models including the covariates listed above, with maternal age as a categorical variable ( $\leq 25$  years, [25 - 30[, [30 - 35[ and  $\geq 35$ ). Weights were trimmed at the 0.1 and 99.9 percentiles. Absolute standardized differences were calculated to assess the balance in baseline covariates before and after weighting. Groups were considered to be balanced when standardized differences were less than 0.1.[18] Cox models with robust sandwich estimates were used to calculate hazard ratios (HR) and their 95% confidence intervals.

As AEDs can be prescribed for a wide range of medical conditions other than epilepsy, a first sensitivity analysis in which the study population was restricted to women considered to be treated for epilepsy (see supplementary Table 1 for definition) was conducted. In this sensitivity analysis, HRs were further adjusted for hospitalization (primary and related diagnoses only) for epilepsy during pregnancy. A second sensitivity analysis, requiring at least one dispensing during pregnancy to consider a woman to be exposed, was also conducted to account for possible misclassification of exposure at the beginning of pregnancy. In a third sensitivity analysis, two other propensity scores were calculated: one excluding proxies for alcohol intake and smoking and another one excluding gestational age and birth weight.

Data extraction and statistical analysis were performed by using SAS Enterprise Guide 4.3 software (SAS Institute, Inc., Cary, NC). Graphics were performed by using R 3.5 statistical software.

RESULTS

Main analysis

From a total of 1,721,990 births satisfying all inclusion and exclusion criteria, 9,034 children were prenatally exposed to AED monotherapy (Figure 1), 32 (0.4%) of whom were censored at death and 1,224 (13.5%) were lost to follow-up. The median follow-up was 3.7 years (interquartile range, 2.7-4.7 years). Of these 9,034 children, 2,916 were exposed to lamotrigine, 1,627 were exposed to pregabalin, 1,246 were exposed to clonazepam, 991 were exposed to valproic acid, 621 were exposed to levetiracetam, 502 were exposed to carbamazepine, 477 were exposed to topiramate, 378 were exposed to gabapentin and 143 were exposed to oxcarbazepine (Table 1). A total of 133 children were exposed to another AED monotherapy, including phenobarbital (N=84), phenytoin (N=13), lacosamide (N=9), zonisamide (N=8), ethosuximide (N=7) and vigabatrin (N=6). The median follow-up ranged from 3.3 to 4.0 years across all AEDs except clonazepam (4.8 years).

Table 1 also reports baseline patient characteristics according to the type of AED prior to IPTW, showing some significant differences between the various AEDs studied and lamotrigine. Before weighting, across all variables included in the propensity score and all AEDs studied, the absolute standardized differences ranged from 0.00 to 0.94. After weighting, all standardized differences were less than 0.1, indicating a good balance between treatment groups (Figure 2).

Table 2 presents the number of events, crude event rates, IRRs and adjusted HRs for the four outcomes and each of the AEDs studied. Compared to prenatal exposure to lamotrigine, prenatal exposures to all of the AEDs studied, excluding valproic acid, were not found to be associated with an increased risk of any of the four outcomes investigated. By contrast,

valproic acid was associated with an increased risk of visits to a speech therapist (HR=1.5[1.1-1.9]) and neurodevelopmental disorders (HR=2.7[1.8-4.0]), particularly pervasive developmental disorders (HR=4.4[2.1-9.3]) and mental retardation (HR=3.1[1.5-6.2]), compared to lamotrigine.

### Sensitivity analyses

In the first sensitivity analysis restricting the study population to women considered to be treated for epilepsy, only results related to carbamazepine, levetiracetam and valproic acid are reported. The number of women considered to be treated for epilepsy and exposed to monotherapy with each of the other AEDs was less than 100. Baseline patient characteristics and absolute standardized differences are available in supplementary Table 3 and supplementary Figure 1, respectively. Compared to lamotrigine, prenatal exposure to levetiracetam was not found to be associated with any of the four outcomes investigated and prenatal exposure to valproic acid was associated with all four outcomes, which is in line with the results of the main analysis. Results were different from the main analysis for the association between carbamazepine and the risk of visits to a speech therapist (HR=0.2[0.1-0.7]) (Table 3).

The results of the second (see supplementary Figure 2 for standardized differences) and third sensitivity analyses were comparable to those of the main analysis (see supplementary Table 4 and supplementary Table 5, respectively).

### Dose

Baseline patient characteristics according to the dose of valproic acid dispensed during pregnancy are reported in supplementary Table 6. A dose-response relationship was observed for the association between prenatal exposure to valproic acid and the risks of visits to a speech therapist (< 700 mg: HR=0.6[0.3-1.0], [700-1500 mg]: HR=1.6[1.2-2.1], ≥ 1500 mg:

HR=2.6[1.7-4.0]) and neurodevelopmental disorders (< 700 mg: HR=1.3[0.6-2.8], [700-1500 mg[: HR=2.1[1.3-3.5], ≥ 1500 mg: HR=7.0[4.3-11.5]), including pervasive developmental disorders (< 700 mg: HR=2.2[0.5-8.5], [700-1500 mg[: HR=2.7[1.0-7.1], ≥ 1500 mg: HR=14.7[6.2-34.7]). The highest HR of mental retardation was also observed for the highest mean daily dose (≥ 1500 mg: HR=7.3[3.0-17.7]). Comparable results were observed when the study population was limited to women considered to be treated for epilepsy (Table 4).

**DISCUSSION**

**Main Findings**

In this nationwide observational study based on the French health care databases, prenatal exposures to levetiracetam, pregabalin, oxcarbazepine, topiramate, gabapentin, clonazepam and carbamazepine were not associated with an increased risk of any of the early neurodevelopmental outcomes investigated compared to lamotrigine. The decreased risk of visits to a speech therapist observed with carbamazepine when the population was restricted to women with epilepsy may be a chance finding. This association is based on only 4 children and carbamazepine was associated with reduced verbal abilities in one study.[19] Prenatal exposure to valproic acid was found to be associated with increased risks of all neurodevelopmental outcomes investigated compared to lamotrigine, ranging from pervasive mental disorders to possible communication-related disorders. A dose-response relationship was observed for most of these outcomes.

**Comparison with Previous Studies**

Prenatal exposure to lamotrigine has been mostly shown not to be associated with poorer neurodevelopmental outcomes, although limited data are available, with no dose-response

relationship.[6] Only two studies have shown that prenatal exposure to lamotrigine was associated with impaired specific cognitive skills[20] and parental concerns about autistic traits and sentence skills.[21]

The results of the present study concerning valproic acid, carbamazepine, levetiracetam and topiramate are consistent with those of previous studies. Prenatal exposure to valproic acid has been associated with poorer cognitive outcomes[19,22–24] and particularly poorer executive functions and memory abilities[23] compared to lamotrigine. Children prenatally exposed to valproic acid also show impaired adaptive behavior[25,26] and school performance[27] compared to lamotrigine-exposed children. Impaired language skills[28] and autism spectrum disorder have been reported to be more frequent among children exposed to valproic acid than among unexposed children.[29,30] A dose-response relationship has also been observed for most of these outcomes.[19,22,23,25,26,28]

Few studies have directly compared prenatal exposure to carbamazepine *versus* lamotrigine and these studies did not find any differences in terms of cognitive development[22,31] and adaptive behavior.[26] Data concerning levetiracetam and topiramate are more limited and no direct comparison with lamotrigine has been published. No increased risk of neurodevelopmental outcomes was found among levetiracetam-exposed children compared to unexposed children[32–34] and, although prenatal exposure to topiramate was associated with poorer neurodevelopmental outcomes in one study,[35] this association was not confirmed by a larger study.[33] Little or no information is available concerning the other AEDs, particularly clonazepam, oxcarbazepine, gabapentin and pregabalin.[29,33,36]

## Strengths

This nationwide cohort study based on the French health care database is the largest study to date to assess the association between AED exposure during pregnancy and

1  
2  
3  
4  
5  
6  
7  
8  
9  
10  
11  
12  
13  
14  
15  
16  
17  
18  
19  
20  
21  
22  
23  
24  
25  
26  
27  
28  
29  
30  
31  
32  
33  
34  
35  
36  
37  
38  
39  
40  
41  
42  
43  
44  
45  
46  
47  
48  
49  
50  
51  
52  
53  
54  
55  
56  
57  
58  
59  
60

neurodevelopmental outcomes in the offspring. This study investigated a wide range of AEDs, including some drugs for which little or no information is available in the literature. The strengths of this study also include the use of propensity score methods to mitigate confounding, as well as the advantages of the French health care databases, such as the independence between ascertainment of medication and outcomes, the absence of recall bias, and the possibility to study the dose-response relationship, which is a key concept in terms of teratogenicity.[33]

**Limitations**

Exposure misclassification constitutes a first limitation. Exposure assessment was based on pharmacy claims, which do not indicate whether the medication is actually taken. Exposure misclassification is more likely for AED classes that are often discontinued before conception.[37] However, the results of the sensitivity analysis regarding exposure measurement suggest that this bias is likely minimal.

Although we used an active-comparator design, residual confounding by unmeasured or insufficiently well measured covariates cannot be excluded. For instance, maternal education and IQ were not available in the databases. Data related to the father could not be linked to the child, not allowing any adjustment for paternal characteristics. Lifestyle factors such as alcohol intake and smoking could also not be exhaustively assessed.

As some AEDs can be prescribed to treat conditions other than epilepsy, the analyses were replicated in a population restricted to women considered to be treated for epilepsy, providing comparable results to those of the main analysis. However, the indication for which an AED is prescribed was not directly available in the databases. We therefore used LTD diagnoses, hospital diagnoses and specific drug reimbursements to identify women with epilepsy. Some studies,[34,38,39] unlike other studies,[19,22–24] have also reported an association between

the severity of maternal epilepsy, particularly seizure type and frequency, and poorer developmental outcomes in the child. As this confounder was not available in the databases, we considered at least one admission to hospital for epilepsy during pregnancy to be a proxy for epilepsy severity. Similar results were observed whether or not this proxy was included in the propensity score.

Outcome misclassification also cannot be ruled out, as the diagnosis codes used to identify neurodevelopmental outcomes have not been externally validated. However, the PMSI database is used for planning and funding purposes and is subject to coding quality control, and LTD registration, which is requested by the patient's general practitioner, must be validated by a medical consultant of the beneficiary's health insurance scheme. In addition, as hospital discharge and LTD diagnoses were used to define outcomes, children not reaching diagnostic thresholds but still having some evidence of impairment were not considered to have experienced the outcomes of interest.[40] Moreover, some of the outcomes studied may not have been exhaustively assessed, as data related to a large share of medical and social welfare services are not available in the French health care databases. Results related to visits to a speech therapist must also be interpreted with caution, as a visit to a speech therapist does not necessarily imply pathology. Speech therapists can also be consulted for various medical reasons, and access to speech therapists is associated with socioeconomic status.[41] Further, because the study outcomes were limited to three subtypes of neurodevelopmental disorders (pervasive developmental disorders, mental retardation and visits to a speech therapist as a proxy for communication-related disorders), no conclusion can be drawn concerning all of the other subtypes of neurodevelopmental disorders.

The short follow-up period constitutes another limitation: the median and maximum lengths of follow-up were 3.7 and 6 years, respectively. In particular, a diagnosis of autism spectrum disorders is considered to be stable at age 2[42] and is made at an average age of 3 years and

5 months in France,[43] but speech therapy is more frequent among school-aged children. Therefore, only early diagnoses, probably corresponding to more severe disorders, were identified. This is especially true for mental retardation: although severe and profound mental retardation can be diagnosed before 3 years old, moderate mental retardation cannot be diagnosed before 4 or 5 years old.[44] Further assessment of children at older developmental stages would be useful to study a broader range of neurodevelopmental disorders. Except clonazepam for which French health authorities took measures to limit off-label use in November 2011,[45] lengths of follow-up were quite comparable across all AEDs. Children exposed to second-generation AEDs had only slightly shorter follow-ups than children exposed to first-generation AEDs, which should not have influenced the results of this study.

**CONCLUSION**

Despite the limitations inherent to health care claims databases, this study, based on 9,034 exposed children, confirms that valproic acid is associated with an increased risk of various neurodevelopmental outcomes compared to lamotrigine, with a dose-response relationship, while no association was observed for the other AEDs including carbamazepine, levetiracetam or topiramate. However, this study needs to be replicated with a longer follow-up period.

Acknowledgements: The authors thank François Alla and Géric Maura for assistance in revising the manuscript for intellectual content and Anthony Saul, medical translator, for assistance in editing the manuscript.

Parts of this work have been previously presented at the 34<sup>th</sup> International Conference on Pharmacoepidemiology and Therapeutic Risk Management in Prague, Czech Republic (August 2018).

Contributors: POB, SM, AW, MZ, JC and RDS contributed to the conception and design of the study. POB and SM contributed to the acquisition of data. POB conducted the statistical analyses. POB, SM, AW, YM, HP, FR, MZ, JC and RDS contributed to the interpretation of data. POB drafted the manuscript. AW, YM, HP, FR, MZ, JC and RDS revised the manuscript for important intellectual content. AW, MZ, JC and RDS coordinated and supervised the study.

Funding: POB and AW are employees of the French National Health Insurance (CNAM). SM, MZ, and RDS are employees of the French National Agency for Medicines and Health Products Safety (ANSM), YM and JC work at Assistance Publique-Hôpitaux de Paris. None of these authors received any funding. All work by HP and FR is supported by Agence Nationale de la Recherche (grants ANR-17-EURE-0017 and ANR-10-IDEX-0001-02).

Competing interests: The authors report no disclosures relevant to the manuscript.

Patient consent for publication: Not required.

Ethics approval: This observational cohort study based on the French health care databases was approved by the French Data Protection Agency (CNIL, approval ID: DE-2015-165) and did not require patient consents or ethics approval.

1  
2  
3  
4  
5  
6  
7  
8  
9  
10  
11  
12  
13  
14  
15  
16  
17  
18  
19  
20  
21  
22  
23  
24  
25  
26  
27  
28  
29  
30  
31  
32  
33  
34  
35  
36  
37  
38  
39  
40  
41  
42  
43  
44  
45  
46  
47  
48  
49  
50  
51  
52  
53  
54  
55  
56  
57  
58  
59  
60

Data sharing statement: Permanent access to the French health care databases is automatically granted to certain government agencies, public institutions and public service authorities.

Temporary access for studies and research is possible upon request from the national health data institute (INDS).

Licence statement: I, the Submitting Author has the right to grant and does grant on behalf of all authors of the Work (as defined in the below author licence), an exclusive licence and/or a non-exclusive licence for contributions from authors who are: i) UK Crown employees; ii) where BMJ has agreed a CC-BY licence shall apply, and/or iii) in accordance with the terms applicable for US Federal Government officers or employees acting as part of their official duties; on a worldwide, perpetual, irrevocable, royalty-free basis to BMJ Publishing Group Ltd (“BMJ”) its licensees and where the relevant Journal is co-owned by BMJ to the co-owners of the Journal, to publish the Work in Journal of Neurology, Neurosurgery, and Psychiatry and any other BMJ products and to exploit all rights, as set out in our licence.

The Submitting Author accepts and understands that any supply made under these terms is made by BMJ to the Submitting Author unless you are acting as an employee on behalf of your employer or a postgraduate student of an affiliated institution which is paying any applicable article publishing charge (“APC”) for Open Access articles. Where the Submitting Author wishes to make the Work available on an Open Access basis (and intends to pay the relevant APC), the terms of reuse of such Open Access shall be governed by a Creative Commons licence – details of these licences and which Creative Commons licence will apply to this Work are set out in our licence referred to above.

## REFERENCES

- 1 Spina E, Perugi G. Antiepileptic drugs: indications other than epilepsy. *Epileptic Disord Int Epilepsy J Videotape* 2004;**6**:57–75.
- 2 Charlton R, Garne E, Wang H, *et al.* Antiepileptic drug prescribing before, during and after pregnancy: a study in seven European regions. *Pharmacoepidemiol Drug Saf* 2015;**24**:1144–54. doi:10.1002/pds.3847
- 3 Blotière P-O, Weill A, Dalichampt M, *et al.* Development of an algorithm to identify pregnancy episodes and related outcomes in health care claims databases: An application to antiepileptic drug use in 4.9 million pregnant women in France. *Pharmacoepidemiol Drug Saf* 2018;**27**:763–70. doi:10.1002/pds.4556
- 4 Bobo WV, Davis RL, Toh S, *et al.* Trends in the use of antiepileptic drugs among pregnant women in the US, 2001–2007: a medication exposure in pregnancy risk evaluation program study. *Paediatr Perinat Epidemiol* 2012;**26**:578–88. doi:10.1111/ppe.12004
- 5 Hill DS, Wlodarczyk BJ, Palacios AM, *et al.* Teratogenic effects of antiepileptic drugs. *Expert Rev Neurother* 2010;**10**:943–59. doi:10.1586/ern.10.57
- 6 Bromley RL, Baker GA. Fetal antiepileptic drug exposure and cognitive outcomes. *Seizure* 2017;**44**:225–31. doi:10.1016/j.seizure.2016.10.006
- 7 US Food and Drug administration. FDA Drug Safety Communication: Children born to mothers who took Valproate products while pregnant may have impaired cognitive development. 2011. <https://www.fda.gov/Drugs/DrugSafety/ucm261543.htm> (accessed 14 Jan 2019).
- 8 US Food and Drug administration. FDA Drug Safety Communication: Valproate Anti-seizure Products Contraindicated for Migraine Prevention in Pregnant Women due to Decreased IQ Scores in Exposed Children. 2013. <https://www.fda.gov/drugs/drugsafety/ucm350684.htm> (accessed 6 Aug 2018).
- 9 European Medicines Agency. CMDh agrees to strengthen warnings on the use of valproate medicines in women and girls. 2014. <https://www.ema.europa.eu/en/medicines/human/referrals/valproate-related-substances> (accessed 14 Jan 2019).
- 10 European Medicines Agency. New measures to avoid valproate exposure in pregnancy endorsed. 2018. <https://www.ema.europa.eu/en/medicines/human/referrals/valproate-related-substances-0> (accessed 14 Jan 2019).
- 11 Tuppin P, Rudant J, Constantinou P, *et al.* Value of a national administrative database to guide public decisions: From the système national d'information interrégimes de l'Assurance Maladie (SNIIRAM) to the système national des données de santé (SNDS) in France. *Rev Epidemiol Sante Publique* 2017;**65 Suppl 4**:S149–67. doi:10.1016/j.respe.2017.05.004
- 12 Fonds CMU-C. Présentation de la CMU-C. <https://www.cmu.fr/cmu-complementaire.php> (accessed 12 Jul 2018).

- 13 Raguideau F, Mezzarobba M, Zureik M, *et al.* Compliance with pregnancy prevention plan recommendations in 8672 French women of childbearing potential exposed to acitretin. *Pharmacoepidemiol Drug Saf* 2015;**24**:526–33. doi:10.1002/pds.3763
- 14 Billionnet C, Mitanchez D, Weill A, *et al.* Gestational diabetes and adverse perinatal outcomes from 716,152 births in France in 2012. *Diabetologia* 2017;**60**:636–44. doi:10.1007/s00125-017-4206-6
- 15 Blotière P-O, Raguideau F, Weill A, *et al.* Risks of 23 specific malformations associated with prenatal exposure to ten antiepileptic drugs. *Neurology*. 2019.
- 16 Lund JL, Richardson DB, Stürmer T. The active comparator, new user study design in pharmacoepidemiology: historical foundations and contemporary application. *Curr Epidemiol Rep* 2015;**2**:221–8. doi:10.1007/s40471-015-0053-5
- 17 Maura G, Billionnet C, Alla F, *et al.* Comparison of Treatment Persistence with Dabigatran or Rivaroxaban versus Vitamin K Antagonist Oral Anticoagulants in Atrial Fibrillation Patients: A Competing Risk Analysis in the French National Health Care Databases. *Pharmacotherapy* 2018;**38**:6–18. doi:10.1002/phar.2046
- 18 Austin PC, Stuart EA. Moving towards best practice when using inverse probability of treatment weighting (IPTW) using the propensity score to estimate causal treatment effects in observational studies. *Stat Med* 2015;**34**:3661–79. doi:10.1002/sim.6607
- 19 Baker GA, Bromley RL, Briggs M, *et al.* IQ at 6 years after in utero exposure to antiepileptic drugs: a controlled cohort study. *Neurology* 2015;**84**:382–90. doi:10.1212/WNL.0000000000001182
- 20 Rihtman T, Parush S, Ornoy A. Developmental outcomes at preschool age after fetal exposure to valproic acid and lamotrigine: cognitive, motor, sensory and behavioral function. *Reprod Toxicol Elmsford N* 2013;**41**:115–25. doi:10.1016/j.reprotox.2013.06.001
- 21 Veiby G, Daltveit AK, Schjølberg S, *et al.* Exposure to antiepileptic drugs in utero and child development: a prospective population-based study. *Epilepsia* 2013;**54**:1462–72. doi:10.1111/epi.12226
- 22 Bromley RL, Mawer G, Love J, *et al.* Early cognitive development in children born to women with epilepsy: a prospective report. *Epilepsia* 2010;**51**:2058–65. doi:10.1111/j.1528-1167.2010.02668.x
- 23 Meador KJ, Baker GA, Browning N, *et al.* Fetal antiepileptic drug exposure and cognitive outcomes at age 6 years (NEAD study): a prospective observational study. *Lancet Neurol* 2013;**12**:244–52. doi:10.1016/S1474-4422(12)70323-X
- 24 Meador KJ, Baker GA, Browning N, *et al.* Cognitive function at 3 years of age after fetal exposure to antiepileptic drugs. *N Engl J Med* 2009;**360**:1597–605. doi:10.1056/NEJMoa0803531
- 25 Cohen MJ, Meador KJ, Browning N, *et al.* Fetal antiepileptic drug exposure: Adaptive and emotional/behavioral functioning at age 6 years. *Epilepsy Behav EB* 2013;**29**:308–15. doi:10.1016/j.yebeh.2013.08.001
- 26 Deshmukh U, Adams J, Macklin EA, *et al.* Behavioral outcomes in children exposed prenatally to lamotrigine, valproate, or carbamazepine. *Neurotoxicol Teratol* 2016;**54**:5–14. doi:10.1016/j.ntt.2016.01.001

- 27 Elkjær LS, Bech BH, Sun Y, *et al.* Association Between Prenatal Valproate Exposure and Performance on Standardized Language and Mathematics Tests in School-aged Children. *JAMA Neurol* Published Online First: 19 February 2018. doi:10.1001/jamaneurol.2017.5035
- 28 Nadebaum C, Anderson VA, Vajda F, *et al.* Language skills of school-aged children prenatally exposed to antiepileptic drugs. *Neurology* 2011;**76**:719–26. doi:10.1212/WNL.0b013e31820d62c7
- 29 Christensen J, Grønberg TK, Sørensen MJ, *et al.* Prenatal Valproate Exposure and Risk of Autism Spectrum Disorders and Childhood Autism. *JAMA* 2013;**309**:1696–703. doi:10.1001/jama.2013.2270
- 30 Bromley RL, Mawer GE, Briggs M, *et al.* The prevalence of neurodevelopmental disorders in children prenatally exposed to antiepileptic drugs. *J Neurol Neurosurg Psychiatry* 2013;**84**:637–43. doi:10.1136/jnnp-2012-304270
- 31 Bromley R, Weston J, Adab N, *et al.* Treatment for epilepsy in pregnancy: neurodevelopmental outcomes in the child. *Cochrane Database Syst Rev* 2014;:CD010236. doi:10.1002/14651858.CD010236.pub2
- 32 Shallcross R, Bromley RL, Irwin B, *et al.* Child development following in utero exposure: levetiracetam vs sodium valproate. *Neurology* 2011;**76**:383–9. doi:10.1212/WNL.0b013e3182088297
- 33 Bromley RL, Calderbank R, Cheyne CP, *et al.* Cognition in school-age children exposed to levetiracetam, topiramate, or sodium valproate. *Neurology* 2016;**87**:1943–53. doi:10.1212/WNL.00000000000003157
- 34 Shallcross R, Bromley RL, Cheyne CP, *et al.* In utero exposure to levetiracetam vs valproate: development and language at 3 years of age. *Neurology* 2014;**82**:213–21. doi:10.1212/WNL.0000000000000030
- 35 Rihtman T, Parush S, Ornoy A. Preliminary findings of the developmental effects of in utero exposure to topiramate. *Reprod Toxicol Elmsford N* 2012;**34**:308–11. doi:10.1016/j.reprotox.2012.05.038
- 36 Miškov S, Gjergja Juraški R, Mikula I, *et al.* The Croatian model of integrative prospective management of epilepsy and pregnancy. *Acta Clin Croat* 2016;**55**:535–48. doi:10.20471/acc.2016.55.04.02
- 37 Grzeskowiak LE, Gilbert AL, Morrison JL. Exposed or not exposed? Exploring exposure classification in studies using administrative data to investigate outcomes following medication use during pregnancy. *Eur J Clin Pharmacol* 2012;**68**:459–67. doi:10.1007/s00228-011-1154-9
- 38 Adab N, Kini U, Vinten J, *et al.* The longer term outcome of children born to mothers with epilepsy. *J Neurol Neurosurg Psychiatry* 2004;**75**:1575–83. doi:10.1136/jnnp.2003.029132
- 39 Vinten J, Adab N, Kini U, *et al.* Neuropsychological effects of exposure to anticonvulsant medication in utero. *Neurology* 2005;**64**:949–54. doi:10.1212/01.WNL.0000154514.82948.69
- 40 Thapar A, Cooper M, Rutter M. Neurodevelopmental disorders. *Lancet Psychiatry* 2017;**4**:339–46. doi:10.1016/S2215-0366(16)30376-5

1  
2  
3  
4  
5  
6  
7  
8  
9  
10  
11  
12  
13  
14  
15  
16  
17  
18  
19  
20  
21  
22  
23  
24  
25  
26  
27  
28  
29  
30  
31  
32  
33  
34  
35  
36  
37  
38  
39  
40  
41  
42  
43  
44  
45  
46  
47  
48  
49  
50  
51  
52  
53  
54  
55  
56  
57  
58  
59  
60

41 Morgan PL, Hammer CS, Farkas G, *et al.* Who Receives Speech/Language Services by 5 Years of  
42 Age in the United States? *Am J Speech Lang Pathol* 2016;**25**:183–99. doi:10.1044/2015\_AJSLP-  
43 14-0201

44 Kleinman JM, Ventola PE, Pandey J, *et al.* Diagnostic stability in very young children with autism  
45 spectrum disorders. *J Autism Dev Disord* 2008;**38**:606–15. doi:10.1007/s10803-007-0427-8

46 Third Autism Plan [Troisième Plan Autisme] (2013-2017).  
47 <https://www.cnsa.fr/documentation/plan-autisme2013.pdf>

48 French National Institute for Health and Medical Research (INSERM). Synthesis of the collective  
49 experience “Intellectual disabilities” [Synthèse de l’expertise collective “Déficiences  
50 intellectuelles”] (2016). [https://www.inserm.fr/information-en-sante/expertises-](https://www.inserm.fr/information-en-sante/expertises-collectives/deficiences-intellectuelles)  
51 [collectives/deficiences-intellectuelles](https://www.inserm.fr/information-en-sante/expertises-collectives/deficiences-intellectuelles)

52 Agence nationale de sécurité du médicament et des produits de santé (ANSM). Clonazepam:  
53 modification of the conditions of prescription or dispensing [Rivotril® (clonazépam) :  
54 Modification des conditions de prescription et de délivrance]. 2011.[https://ansm.sante.fr/S-](https://ansm.sante.fr/S-informer/Points-d-information-Points-d-information/Rivotril-R-clonazepam-Modification-des-conditions-de-prescription-et-de-delivrance-Point-d-information)  
55 [informer/Points-d-information-Points-d-information/Rivotril-R-clonazepam-Modification-des-](https://ansm.sante.fr/S-informer/Points-d-information-Points-d-information/Rivotril-R-clonazepam-Modification-des-conditions-de-prescription-et-de-delivrance-Point-d-information)  
56 [conditions-de-prescription-et-de-delivrance-Point-d-information](https://ansm.sante.fr/S-informer/Points-d-information-Points-d-information/Rivotril-R-clonazepam-Modification-des-conditions-de-prescription-et-de-delivrance-Point-d-information) (accessed 23 Apr 2019).

Table 1. Baseline characteristics according to AED use during pregnancy

|                                                |                 | Lamotrigine   | Carbamazepine | Clonazepam    | Gabapentin    | Levetiracetam |     |  |
|------------------------------------------------|-----------------|---------------|---------------|---------------|---------------|---------------|-----|--|
| Number of exposed pregnancies                  |                 | 2,916         | 502           | 1,246         | 378           | 621           |     |  |
| Median follow-up (years) (IQR)                 |                 | 3.5 (2.7-4.5) | 3.8 (2.8-4.7) | 4.8 (4.1-5.3) | 3.4 (2.5-4.3) | 3.4 (2.6-4.4) |     |  |
| Maternal age at birth (years)                  | < 25            | 431 (14.8)    | 51 (10.2)     | 118 (9.5)     | 32 (8.5)      | 119 (19.2)    |     |  |
|                                                | [25 - 30[       | 927 (31.8)    | 119 (23.7)    | 302 (24.2)    | 90 (23.8)     | 212 (34.1)    | *   |  |
|                                                | [30 - 35[       | 980 (33.6)    | 168 (33.5)    | 380 (30.5)    | 125 (33.1)    | 181 (29.1)    |     |  |
|                                                | ≥ 35            | 578 (19.8)    | 164 (32.7)    | 446 (35.8)    | 131 (34.7)    | 109 (17.6)    |     |  |
| Eligibility for CMU-C                          |                 | 461 (15.8)    | 98 (19.5)     | 303 (24.3)    | 82 (21.7)     | 134 (21.6)    | **  |  |
| History of mental and behavioral disorders     |                 | 368 (12.6)    | 104 (20.7)    | 216 (17.3)    | 43 (11.4)     | 51 (8.2)      | *   |  |
| Proxy for alcohol intake                       |                 | 35 (1.2)      | 7 (1.4)       | 35 (2.8)      | 6 (1.6)       | 13 (2.1)      | NS  |  |
| Proxy for smoking                              |                 | 311 (10.7)    | 59 (11.8)     | 165 (13.2)    | 66 (17.5)     | 69 (11.1)     | NS  |  |
| Folic acid supplementation                     |                 | 2,026 (69.5)  | 281 (56.0)    | 360 (28.9)    | 139 (36.8)    | 396 (63.8)    | *   |  |
| SSRIs during pregnancy                         |                 | 210 (7.2)     | 42 (8.4)      | 201 (16.1)    | 42 (11.1)     | 23 (3.7)      | *   |  |
| History of antipsychotic use                   |                 | 227 (7.8)     | 64 (12.7)     | 123 (9.9)     | 24 (6.3)      | 15 (2.4)      | *** |  |
| Number of psychiatric medications <sup>a</sup> | 0               | 1,641 (56.3)  | 265 (52.8)    | 492 (39.5)    | 157 (41.5)    | 366 (58.9)    |     |  |
|                                                | 1               | 669 (22.9)    | 107 (21.3)    | 283 (22.7)    | 91 (24.1)     | 138 (22.2)    |     |  |
|                                                | 2               | 258 (8.8)     | 42 (8.4)      | 149 (12.0)    | 49 (13.0)     | 54 (8.7)      | NS  |  |
|                                                | 3-4             | 211 (7.2)     | 52 (10.4)     | 183 (14.7)    | 54 (14.3)     | 39 (6.3)      |     |  |
|                                                | ≥ 5             | 137 (4.7)     | 36 (7.2)      | 139 (11.2)    | 27 (7.1)      | 24 (3.9)      |     |  |
| Gestational age (weeks after LMP)              | < 32            | 11 (0.4)      | 3 (0.6)       | 10 (0.8)      | 2 (0.5)       | 7 (1.1)       |     |  |
|                                                | [32 - 35[       | 42 (1.4)      | 8 (1.6)       | 28 (2.2)      | 23 (6.1)      | 11 (1.8)      | NS  |  |
|                                                | [35 - 37[       | 129 (4.4)     | 14 (2.8)      | 55 (4.4)      | 21 (5.6)      | 33 (5.3)      |     |  |
|                                                | ≥ 37            | 2,734 (93.8)  | 477 (95.0)    | 1,153 (92.5)  | 332 (87.8)    | 570 (91.8)    |     |  |
| Gender (male)                                  |                 | 1,524 (52.3)  | 265 (52.8)    | 597 (47.9)    | 206 (54.5)    | 292 (47.0)    | *   |  |
| Birth weight                                   | < 2,500         | 179 (6.1)     | 35 (7.0)      | 105 (8.4)     | 47 (12.4)     | 60 (9.7)      |     |  |
|                                                | [2,500 - 3,000[ | 630 (21.6)    | 110 (21.9)    | 278 (22.3)    | 73 (19.3)     | 152 (24.5)    | **  |  |
|                                                | [3,000 - 3,500[ | 1,196 (41.0)  | 182 (36.3)    | 485 (38.9)    | 140 (37.0)    | 251 (40.4)    |     |  |
|                                                | ≥ 3,500         | 911 (31.2)    | 175 (34.9)    | 378 (30.3)    | 118 (31.2)    | 158 (25.4)    |     |  |

Table 1. Baseline characteristics according to AED use during pregnancy (continued)

|                                                |                 | Oxcarbazepine |  | Pregabalin    |  | Topiramate    |  | Valproic acid |  |
|------------------------------------------------|-----------------|---------------|--|---------------|--|---------------|--|---------------|--|
| Number of exposed pregnancies                  |                 | 143           |  | 1,627         |  | 477           |  | 991           |  |
| Median follow-up (years) (IQR)                 |                 | 4.0 (2.7-4.8) |  | 3.3 (2.5-4.3) |  | 3.6 (2.6-4.6) |  | 3.9 (2.8-4.8) |  |
| Maternal age at birth (years)                  | < 25            | 23 (16.1)     |  | 139 (8.5)     |  | 66 (13.8)     |  | 137 (13.8)    |  |
|                                                | [25 - 30[       | 32 (22.4)     |  | 414 (25.4)    |  | 144 (30.2)    |  | 259 (26.1)    |  |
|                                                | [30 - 35[       | 52 (36.4)     |  | 495 (30.4)    |  | 153 (32.1)    |  | 310 (31.3)    |  |
|                                                | ≥ 35            | 36 (25.2)     |  | 579 (35.6)    |  | 114 (23.9)    |  | 285 (28.8)    |  |
| Eligibility for CMU-C                          |                 | 36 (25.2)     |  | 404 (24.8)    |  | 79 (16.6)     |  | 311 (31.4)    |  |
| History of mental and behavioral disorders     |                 | 36 (25.2)     |  | 169 (10.4)    |  | 54 (11.3)     |  | 96 (9.7)      |  |
| Proxy for alcohol intake                       |                 | 1 (0.7)       |  | 21 (1.3)      |  | 7 (1.5)       |  | 22 (2.2)      |  |
| Proxy for smoking                              |                 | 13 (9.1)      |  | 257 (15.8)    |  | 43 (9.0)      |  | 136 (13.7)    |  |
| Folic acid supplementation                     |                 | 89 (62.2)     |  | 440 (27.0)    |  | 179 (37.5)    |  | 525 (53.0)    |  |
| SSRIs during pregnancy                         |                 | 22 (15.4)     |  | 172 (10.6)    |  | 55 (11.5)     |  | 33 (3.3)      |  |
| History of antipsychotic use                   |                 | 31 (21.7)     |  | 79 (4.9)      |  | 30 (6.3)      |  | 49 (4.9)      |  |
| Number of psychiatric medications <sup>a</sup> | 0               | 65 (45.5)     |  | 701 (43.1)    |  | 217 (45.5)    |  | 653 (65.9)    |  |
|                                                | 1               | 33 (23.1)     |  | 355 (21.8)    |  | 92 (19.3)     |  | 180 (18.2)    |  |
|                                                | 2               | 14 (9.8)      |  | 227 (14.0)    |  | 69 (14.5)     |  | 67 (6.8)      |  |
|                                                | 3-4             | 9 (6.3)       |  | 216 (13.3)    |  | 68 (14.3)     |  | 45 (4.5)      |  |
|                                                | ≥ 5             | 22 (15.4)     |  | 128 (7.9)     |  | 31 (6.5)      |  | 46 (4.6)      |  |
| Gestational age (weeks after LMP)              | < 32            | 1 (0.7)       |  | 12 (0.7)      |  | 7 (1.5)       |  | 7 (0.7)       |  |
|                                                | [32 - 35[       | 3 (2.1)       |  | 37 (2.3)      |  | 10 (2.1)      |  | 19 (1.9)      |  |
|                                                | [35 - 37[       | 6 (4.2)       |  | 61 (3.7)      |  | 19 (4.0)      |  | 45 (4.5)      |  |
|                                                | ≥ 37            | 133 (93.0)    |  | 1,517 (93.2)  |  | 441 (92.5)    |  | 920 (92.8)    |  |
| Gender (male)                                  |                 | 65 (45.5)     |  | 847 (52.1)    |  | 254 (53.2)    |  | 496 (50.1)    |  |
| Birth weight                                   | < 2,500         | 12 (8.4)      |  | 118 (7.3)     |  | 32 (6.7)      |  | 88 (8.9)      |  |
|                                                | [2,500 - 3,000[ | 30 (21.0)     |  | 324 (19.9)    |  | 90 (18.9)     |  | 227 (22.9)    |  |

|  |                 |           |            |            |            |
|--|-----------------|-----------|------------|------------|------------|
|  | [3,000 - 3,500[ | 60 (42.0) | 630 (38.7) | 203 (42.6) | 389 (39.3) |
|  | ≥ 3,500         | 41 (28.7) | 555 (34.1) | 152 (31.9) | 287 (29.0) |

Abbreviations: AED = antiepileptic drug; IQR = interquartile range; CMU- C = complementary universal health insurance for low-income people; SSRIs = selective serotonin reuptake inhibitors; LMP = last menstrual period

Figures are N (%).

<sup>a</sup> Number of 5th level ATC classes of psychiatric medications to whom mothers were exposed in the year before pregnancy

\*\*\* p <0.0001; \*\* p <0.001; \* p <0.05; NS: Not Significant

Table 2. Number of events, crude event rates (per 1,000), crude IRRs and adjusted HRs for the four outcomes and each of the AEDs studied - main analysis

|                                          | Events    | Crude event rates | IRR                    | HR [95% CI]            |
|------------------------------------------|-----------|-------------------|------------------------|------------------------|
| <i>Neurodevelopmental disorders</i>      |           |                   |                        |                        |
| Lamotrigine                              | 51        | 4.9               |                        |                        |
| Carbamazepine                            | 13        | 7.0               | 1.4 [0.8 - 2.6]        | 1.2 [0.6 - 2.2]        |
| Clonazepam                               | 28        | 5.1               | 1.0 [0.6 - 1.6]        | 0.6 [0.4 - 1.1]        |
| Gabapentin                               | 4         | 3.1               | 0.6 [0.2 - 1.7]        | 0.4 [0.1 - 1.3]        |
| Levetiracetam                            | 8         | 3.7               | 0.8 [0.4 - 1.6]        | 0.7 [0.3 - 1.5]        |
| Oxcarbazepine                            | 3         | 5.6               | 1.1 [0.4 - 3.7]        | 0.8 [0.2 - 3.2]        |
| Pregabalin                               | 28        | 5.0               | 1.0 [0.6 - 1.6]        | 0.6 [0.4 - 1.0]        |
| Topiramate                               | 7         | 4.1               | 0.8 [0.4 - 1.8]        | 0.8 [0.4 - 1.9]        |
| <b>Valproic acid</b>                     | <b>50</b> | <b>13.5</b>       | <b>2.7 [1.9 - 4.0]</b> | <b>2.7 [1.8 - 4.0]</b> |
| <i>Pervasive developmental disorders</i> |           |                   |                        |                        |
| Lamotrigine                              | 11        | 1.1               |                        |                        |
| Carbamazepine                            | 3         | 1.6               | 1.5 [0.4 - 5.4]        | 1.3 [0.3 - 5.0]        |
| Clonazepam                               | 8         | 1.4               | 1.4 [0.5 - 3.4]        | 0.8 [0.3 - 2.1]        |
| Gabapentin                               | 3         | 2.3               | 2.2 [0.6 - 7.9]        | 1.8 [0.4 - 7.0]        |
| Levetiracetam                            | 4         | 1.8               | 1.8 [0.6 - 5.5]        | 1.6 [0.5 - 5.4]        |
| Oxcarbazepine                            | 1         | 1.9               | 1.8 [0.2 - 13.6]       | 2.0 [0.3 - 13.8]       |
| Pregabalin                               | 7         | 1.2               | 1.2 [0.5 - 3.1]        | 1.1 [0.4 - 3.0]        |
| Topiramate                               | 1         | 0.6               | 0.6 [0.1 - 4.3]        | 0.3 [0.0 - 4.9]        |
| <b>Valproic acid</b>                     | <b>17</b> | <b>4.5</b>        | <b>4.3 [2.0 - 9.1]</b> | <b>4.4 [2.1 - 9.3]</b> |
| <i>Mental retardation</i>                |           |                   |                        |                        |
| Lamotrigine                              | 15        | 1.4               |                        |                        |
| Carbamazepine                            | 2         | 1.1               | 0.7 [0.2 - 3.2]        | 0.6 [0.1 - 2.9]        |
| Clonazepam                               | 3         | 0.5               | 0.4 [0.1 - 1.3]        | 0.3 [0.1 - 1.2]        |
| Gabapentin                               | 0         | 0.0               | N/A                    | N/A                    |
| Levetiracetam                            | 1         | 0.5               | 0.3 [0.0 - 2.4]        | 0.3 [0.0 - 2.5]        |
| Oxcarbazepine                            | 0         | 0.0               | N/A                    | N/A                    |
| Pregabalin                               | 7         | 1.2               | 0.9 [0.4 - 2.1]        | 0.6 [0.2 - 1.8]        |
| Topiramate                               | 2         | 1.2               | 0.8 [0.2 - 3.5]        | 0.5 [0.1 - 3.3]        |
| <b>Valproic acid</b>                     | <b>15</b> | <b>4.0</b>        | <b>2.8 [1.3 - 5.6]</b> | <b>3.1 [1.5 - 6.2]</b> |
| <i>Visits to a speech therapist</i>      |           |                   |                        |                        |
| Lamotrigine                              | 157       | 15.2              |                        |                        |
| Carbamazepine                            | 31        | 16.7              | 1.1 [0.8 - 1.6]        | 0.9 [0.6 - 1.4]        |
| Clonazepam                               | 97        | 17.7              | 1.2 [0.9 - 1.5]        | 0.8 [0.6 - 1.0]        |
| Gabapentin                               | 11        | 8.5               | 0.6 [0.3 - 1.0]        | 0.7 [0.4 - 1.2]        |
| Levetiracetam                            | 22        | 10.2              | 0.7 [0.4 - 1.1]        | 0.7 [0.5 - 1.1]        |
| Oxcarbazepine                            | 13        | 24.6              | 1.6 [0.9 - 2.9]        | 1.3 [0.7 - 2.5]        |
| <b>Pregabalin</b>                        | <b>61</b> | <b>11.0</b>       | <b>0.7 [0.5 - 1.0]</b> | <b>0.7 [0.5 - 1.0]</b> |
| Topiramate                               | 33        | 19.4              | 1.3 [0.9 - 1.9]        | 1.2 [0.8 - 1.8]        |
| <b>Valproic acid</b>                     | <b>93</b> | <b>25.1</b>       | <b>1.7 [1.3 - 2.1]</b> | <b>1.5 [1.1 - 1.9]</b> |

Abbreviations: AED = antiepileptic drug; IRR = incidence rate ratio; HR = hazard ratio; N/A = not applicable

Lines marked in bold correspond to HRs for which the 95% CI does not include 1.

For peer review only

Table 3. Number of events, crude event rates (per 1,000), crude IRRs and adjusted HRs for the four outcomes and each of the AEDs studied - study population limited to women considered to be treated for epilepsy

|                                          | Events    | Crude event rates | IRR                     | HR <sup>a</sup> [95% CI] | HR <sup>b</sup> [95% CI] |
|------------------------------------------|-----------|-------------------|-------------------------|--------------------------|--------------------------|
| <i>Neurodevelopmental disorders</i>      |           |                   |                         |                          |                          |
| Lamotrigine                              | 32        | 4.2               |                         |                          |                          |
| Carbamazepine <sup>c</sup>               | 1         | 1.5               | 0.4 [0.0 - 2.7]         | 0.2 [0.0 - 2.7]          | 0.2 [0.0 - 2.7]          |
| Levetiracetam                            | 8         | 3.7               | 0.9 [0.4 - 1.9]         | 0.8 [0.4 - 1.8]          | 0.8 [0.4 - 1.8]          |
| <b>Valproic acid</b>                     | <b>50</b> | <b>13.5</b>       | <b>3.2 [2.0 - 5.0]</b>  | <b>3.2 [2.0 - 4.9]</b>   | <b>3.5 [2.3 - 5.4]</b>   |
| <i>Pervasive developmental disorders</i> |           |                   |                         |                          |                          |
| Lamotrigine                              | 7         | 0.9               |                         |                          |                          |
| Carbamazepine <sup>c</sup>               | 0         | 0.0               | N/A                     | N/A                      | N/A                      |
| Levetiracetam                            | 4         | 1.8               | 2.0 [0.6 - 6.8]         | 1.8 [0.5 - 6.6]          | 1.8 [0.5 - 6.6]          |
| <b>Valproic acid</b>                     | <b>17</b> | <b>4.5</b>        | <b>4.9 [2.0 - 11.8]</b> | <b>4.9 [2.0 - 11.8]</b>  | <b>4.7 [1.9 - 11.4]</b>  |
| <i>Mental retardation</i>                |           |                   |                         |                          |                          |
| Lamotrigine                              | 10        | 1.3               |                         |                          |                          |
| Carbamazepine <sup>c</sup>               | 0         | 0.0               | N/A                     | N/A                      | N/A                      |
| Levetiracetam                            | 1         | 0.5               | 0.3 [0.0 - 2.7]         | 0.4 [0.1 - 2.9]          | 0.4 [0.1 - 2.9]          |
| <b>Valproic acid</b>                     | <b>15</b> | <b>4.0</b>        | <b>3.0 [1.4 - 6.7]</b>  | <b>3.1 [1.4 - 7.0]</b>   | <b>4.0 [1.9 - 8.6]</b>   |
| <i>Visits to a speech therapist</i>      |           |                   |                         |                          |                          |
| Lamotrigine                              | 122       | 16.2              |                         |                          |                          |
| <b>Carbamazepine<sup>c</sup></b>         | <b>4</b>  | <b>6.1</b>        | <b>0.4 [0.1 - 1.0]</b>  | <b>0.2 [0.1 - 0.7]</b>   | <b>0.2 [0.1 - 0.7]</b>   |
| Levetiracetam                            | 22        | 10.2              | 0.6 [0.4 - 1.0]         | 0.7 [0.4 - 1.1]          | 0.7 [0.4 - 1.1]          |
| <b>Valproic acid</b>                     | <b>93</b> | <b>25.1</b>       | <b>1.6 [1.2 - 2.0]</b>  | <b>1.4 [1.1 - 1.8]</b>   | <b>1.5 [1.1 - 1.9]</b>   |

Abbreviations: AED = antiepileptic drug; IRR = incidence rate ratio; HR = hazard ratio; N/A = not applicable

Lines marked in bold correspond to HRs for which the 95% CI does not include 1.

<sup>a</sup> adjusted for all covariates except hospitalization for epilepsy during pregnancy

<sup>b</sup> adjusted for all covariates including hospitalization for epilepsy during pregnancy

<sup>c</sup> no possible adjustment for the proxy for alcohol

Table 4. Number of events, crude event rates (per 1,000), crude IRRs and adjusted HRs for the four outcomes according to the dose of valproic acid dispensed during pregnancy - main analysis and sensitivity analysis restricted to women considered to be treated for epilepsy

|                                   |               | Events | Crude event rates | Main analysis     |                          | Women with epilepsy |                          |                          |
|-----------------------------------|---------------|--------|-------------------|-------------------|--------------------------|---------------------|--------------------------|--------------------------|
|                                   |               |        |                   | IRR               | HR <sup>a</sup> [95% CI] | IRR                 | HR <sup>a</sup> [95% CI] | HR <sup>b</sup> [95% CI] |
| Neuro-developmental disorders     | < 700 mg      | 7      | 6.3               | 1.3 [0.6 - 2.8]   | 1.3 [0.6 - 2.8]          | 1.5 [0.7 - 3.4]     | 1.6 [0.7 - 3.6]          | 1.6 [0.7 - 3.6]          |
|                                   | [700-1500 mg[ | 23     | 11.5              | 2.3 [1.4 - 3.8]   | 2.1 [1.3 - 3.5]          | 2.7 [1.6 - 4.6]     | 2.5 [1.5 - 4.3]          | 2.7 [1.6 - 4.6]          |
|                                   | ≥ 1500 mg     | 20     | 33.5              | 6.8 [4.1 - 11.5]  | 7.0 [4.3 - 11.5]         | 7.9 [4.5 - 13.8]    | 8.6 [5.1 - 14.5]         | 8.7 [5.2 - 14.6]         |
| Pervasive developmental disorders | < 700 mg      | 2      | 1.8               | 1.7 [0.4 - 7.6]   | 2.2 [0.5 - 8.5]          | 1.9 [0.4 - 9.3]     | 2.9 [0.7 - 11.6]         | 2.7 [0.7 - 11.4]         |
|                                   | [700-1500 mg[ | 7      | 3.4               | 3.3 [1.3 - 8.4]   | 2.7 [1.0 - 7.1]          | 3.7 [1.3 - 10.7]    | 3.1 [1.1 - 9.0]          | 3.0 [1.0 - 8.9]          |
|                                   | ≥ 1500 mg     | 8      | 12.8              | 12.2 [4.9 - 30.4] | 14.7 [6.2 - 34.7]        | 14.0 [5.1 - 38.5]   | 17.0 [6.5 - 44.6]        | 15.4 [5.7 - 41.1]        |
| Mental retardation                | < 700 mg      | 5      | 4.4               | 3.1 [1.1 - 8.5]   | 1.5 [0.4 - 5.9]          | 3.4 [1.2 - 9.9]     | 1.8 [0.4 - 7.0]          | 1.6 [0.4 - 6.7]          |
|                                   | [700-1500 mg[ | 5      | 2.5               | 1.7 [0.6 - 4.7]   | 1.8 [0.7 - 4.9]          | 1.9 [0.6 - 5.5]     | 1.9 [0.7 - 5.7]          | 2.6 [1.0 - 6.7]          |
|                                   | ≥ 1500 mg     | 5      | 7.9               | 5.5 [2.0 - 15.2]  | 7.3 [3.0 - 17.7]         | 6.0 [2.1 - 17.6]    | 7.1 [2.7 - 18.7]         | 8.4 [3.4 - 20.4]         |
| Visits to a speech therapist      | < 700 mg      | 13     | 11.6              | 0.8 [0.4 - 1.3]   | 0.6 [0.3 - 1.0]          | 0.7 [0.4 - 1.3]     | 0.6 [0.3 - 1.0]          | 0.5 [0.3 - 0.9]          |
|                                   | [700-1500 mg[ | 54     | 27.3              | 1.8 [1.3 - 2.5]   | 1.6 [1.2 - 2.1]          | 1.7 [1.2 - 2.3]     | 1.5 [1.1 - 2.0]          | 1.5 [1.1 - 2.1]          |
|                                   | ≥ 1500 mg     | 26     | 43.4              | 2.9 [1.9 - 4.3]   | 2.6 [1.7 - 4.0]          | 2.7 [1.8 - 4.1]     | 2.6 [1.7 - 4.0]          | 2.7 [1.8 - 4.1]          |

Abbreviations: IRR = incidence rate ratio; HR = hazard ratio

<sup>a</sup> adjusted for all covariates except hospitalization for epilepsy during pregnancy

<sup>b</sup> adjusted for all covariates including hospitalization for epilepsy during pregnancy

1  
2  
3 Figure 1. Inclusion flow chart  
4

5 Abbreviation: AED = antiepileptic drug  
6  
7  
8

9  
10 Figure 2. Differences in baseline covariates between children exposed to lamotrigine  
11 (reference group) and children exposed to the other AEDs studied before (grey dots) and after  
12 IPTW (black dots)  
13

14 Abbreviations: AED = antiepileptic drug; IPTW = inverse probability of treatment weighting;  
15 cmu-c = complementary universal health insurance; n.psy. medications = number of ATC  
16 classes of psychiatric medications  
17  
18  
19  
20  
21  
22  
23  
24  
25  
26  
27  
28  
29  
30  
31  
32  
33  
34  
35  
36  
37  
38  
39  
40  
41  
42  
43  
44  
45  
46  
47  
48  
49  
50  
51  
52  
53  
54  
55  
56  
57  
58  
59  
60



152x195mm (150 x 150 DPI)



**Supplementary Table 1. Hospital discharge diagnoses, LTD diagnoses and ATC codes used to identify comorbidities and comedications**

|                                            | Hospital discharge diagnoses (PD, RD and AD)                                                                                                | LTD                                   | Specific drug reimbursements                                                                                                                                                                                                                                           |
|--------------------------------------------|---------------------------------------------------------------------------------------------------------------------------------------------|---------------------------------------|------------------------------------------------------------------------------------------------------------------------------------------------------------------------------------------------------------------------------------------------------------------------|
| <b>Exclusion criterion</b>                 |                                                                                                                                             |                                       |                                                                                                                                                                                                                                                                        |
| Brain malformation                         | Q00-04, Q05.0-05.4 <sup>a</sup>                                                                                                             |                                       |                                                                                                                                                                                                                                                                        |
| <b>Comorbidities</b>                       |                                                                                                                                             |                                       |                                                                                                                                                                                                                                                                        |
| History of mental and behavioral disorders | F00-99 (except F10, F17) <sup>b</sup>                                                                                                       | F00-99 (except F10, F17) <sup>c</sup> |                                                                                                                                                                                                                                                                        |
| Proxy for alcohol intake                   | E24.4, F10, G31.2, G62.1, G72.1, I42.6, K29.2, K70, K86.0, P04.3, Q86.0, R78.0, T51, X45, X65, Y15, Y57.3, Z50.2, Z71.4, Z72.1 <sup>d</sup> | F10, K70 <sup>e</sup>                 | Disulfiram, Acamprosate, Naltrexone, Nalmefene <sup>d</sup>                                                                                                                                                                                                            |
| Proxy for smoking                          | F17, I73.1, J41-44, P04.2, T65.2, Z71.6, Z72.0 <sup>d</sup>                                                                                 | F17, J41-44 <sup>e</sup>              | Nicotine replacement therapy<br>Indacaterol, olodaterol, tiotropium bromide, umeclidinium bromide, glycopyrronium bromide <sup>d</sup>                                                                                                                                 |
| <b>Indication</b>                          |                                                                                                                                             |                                       |                                                                                                                                                                                                                                                                        |
| Epilepsy                                   | G40, G41 <sup>d</sup>                                                                                                                       | G40, G41 <sup>e</sup>                 | Valproic acid as an AED, eslicarbazepine, ethosuximide, lacosamide, levetiracetam, perampamel, phenobarbital, phenytoin, retigabine, rufinamide, stiripentol, vigabatrin, zonisamide or lamotrigine, oxcarbazepine, primidone prescribed by a neurologist <sup>d</sup> |
| <b>Comedications</b>                       |                                                                                                                                             |                                       |                                                                                                                                                                                                                                                                        |
| Folic acid supplementation                 |                                                                                                                                             |                                       | Reimbursed folic acid treatments <sup>f</sup>                                                                                                                                                                                                                          |
| SSRIs                                      |                                                                                                                                             |                                       | Fluoxetine, citalopram, paroxetine, sertraline, fluvoxamine, escitalopram <sup>g</sup>                                                                                                                                                                                 |
| Antipsychotics                             |                                                                                                                                             |                                       | First- and second-generation antipsychotics <sup>b</sup>                                                                                                                                                                                                               |
| Proxy for severity of mental disorder      |                                                                                                                                             |                                       | Hypnotics, anxiolytics, antidepressants, antipsychotics <sup>b</sup>                                                                                                                                                                                                   |

Abbreviations: PD = primary diagnosis; RD = related diagnosis; AD = associated diagnosis; LTD = long-term disease; SSRIs = selective serotonin reuptake inhibitors

<sup>a</sup> during the birth stay

1  
2  
3  
4  
5  
6  
7  
8  
9  
10  
11  
12  
13  
14  
15  
16  
17  
18  
19  
20  
21  
22  
23  
24  
25  
26  
27  
28  
29  
30  
31  
32  
33  
34  
35  
36  
37  
38  
39  
40  
41  
42  
43  
44  
45  
46

- <sup>b</sup> in the year before pregnancy
- <sup>c</sup> beginning before pregnancy
- <sup>d</sup> in the year before or during pregnancy
- <sup>e</sup> beginning before birth
- <sup>f</sup> between one month before pregnancy and 3 months after the start of pregnancy
- <sup>g</sup> during pregnancy

For peer review only

**Supplementary Table 2. Study drugs**

| Drug name                  | ATC code |
|----------------------------|----------|
| Carbamazepine              | N03AF01  |
| Clonazepam                 | N03AE01  |
| Eslicarbazepine            | N03AF04  |
| Ethosuximide               | N03AD01  |
| Gabapentin                 | N03AX12  |
| Lacosamide                 | N03AX18  |
| Lamotrigine                | N03AX09  |
| Levetiracetam              | N03AX14  |
| Oxcarbazepine              | N03AF02  |
| Perampanel                 | N03AX22  |
| Phenobarbital              | N03AA02  |
| Phenytoin                  | N03AB02  |
| Pregabalin                 | N03AX16  |
| Primidone                  | N03AA03  |
| Retigabine                 | N03AX21  |
| Rufinamide                 | N03AF03  |
| Stiripentol                | N03AX17  |
| Tiagabine                  | N03AG06  |
| Topiramate                 | N03AX11  |
| Valproic acid <sup>a</sup> | N03AG01  |
| Vigabatrin                 | N03AG04  |
| Zonisamide                 | N03AX15  |

Abbreviation: ATC code = anatomical therapeutic chemical code

<sup>a</sup>Divalproex sodium and valpromide are only indicated for the treatment of bipolar disorder in France and are therefore not considered to be AEDs.

Supplementary Table 3. Baseline characteristics according to AED use during pregnancy - study population limited to women considered to be treated for epilepsy

|                                                |                 | Lamotrigine  | Carbamazepine | Levetiracetam | Valproic acid |     |     |
|------------------------------------------------|-----------------|--------------|---------------|---------------|---------------|-----|-----|
| Number of exposed pregnancies                  |                 | 2,108        | 176           | 621           | 991           |     |     |
| Maternal age at birth (years)                  | < 25            | 349 (16.6)   | 21 (11.9)     | 119 (19.2)    | 137 (13.8)    |     |     |
|                                                | [25 - 30[       | 715 (33.9)   | 42 (23.9)     | 212 (34.1)    | 259 (26.1)    | NS  | *** |
|                                                | [30 - 35[       | 679 (32.2)   | 60 (34.1)     | 181 (29.1)    | 310 (31.3)    |     |     |
|                                                | ≥ 35            | 365 (17.3)   | 53 (30.1)     | 109 (17.6)    | 285 (28.8)    |     |     |
| Eligibility for CMU-C                          |                 | 340 (16.1)   | 30 (17.0)     | 134 (21.6)    | 311 (31.4)    | *   | *** |
| Hospitalization for epilepsy                   |                 | 171 (8.1)    | 13 (7.4)      | 43 (6.9)      | 22 (2.2)      | NS  | *** |
| History of mental and behavioral disorders     |                 | 150 (7.1)    | 18 (10.2)     | 51 (8.2)      | 96 (9.7)      | NS  | *   |
| Proxy for alcohol intake                       |                 | 18 (0.9)     | 0 (0.0)       | 13 (2.1)      | 22 (2.2)      | *   | *   |
| Proxy for smoking                              |                 | 204 (9.7)    | 21 (11.9)     | 69 (11.1)     | 136 (13.7)    | NS  | **  |
| Folic acid supplementation                     |                 | 1,537 (72.9) | 133 (75.6)    | 396 (63.8)    | 525 (53.0)    | *** | *** |
| SSRIs during pregnancy                         |                 | 55 (2.6)     | 5 (2.8)       | 23 (3.7)      | 33 (3.3)      | NS  | NS  |
| History of antipsychotic use                   |                 | 40 (1.9)     | 4 (2.3)       | 15 (2.4)      | 49 (4.9)      | NS  | *** |
| Number of psychiatric medications <sup>a</sup> | 0               | 1,286 (61.0) | 105 (59.7)    | 366 (58.9)    | 653 (65.9)    |     |     |
|                                                | 1               | 522 (24.8)   | 51 (29.0)     | 138 (22.2)    | 180 (18.2)    |     |     |
|                                                | 2               | 167 (7.9)    | 11 (6.3)      | 54 (8.7)      | 67 (6.8)      | *   | *** |
|                                                | 3-4             | 91 (4.3)     | 4 (2.3)       | 39 (6.3)      | 45 (4.5)      |     |     |
|                                                | ≥ 5             | 42 (2.0)     | 5 (2.8)       | 24 (3.9)      | 46 (4.6)      |     |     |
| Gestational age (weeks after LMP)              | < 32            | 8 (0.4)      | 2 (1.1)       | 7 (1.1)       | 7 (0.7)       |     |     |
|                                                | [32 - 35[       | 32 (1.5)     | 2 (1.1)       | 11 (1.8)      | 19 (1.9)      | NS  | NS  |
|                                                | [35 - 37[       | 91 (4.3)     | 5 (2.8)       | 33 (5.3)      | 45 (4.5)      |     |     |
|                                                | ≥ 37            | 1,977 (93.8) | 167 (94.9)    | 570 (91.8)    | 920 (92.8)    |     |     |
| Gender (male)                                  |                 | 1,115 (52.9) | 96 (54.5)     | 292 (47.0)    | 496 (50.1)    | *   | NS  |
| Birth weight                                   | < 2,500         | 128 (6.1)    | 14 (8.0)      | 60 (9.7)      | 88 (8.9)      |     |     |
|                                                | [2,500 - 3,000[ | 460 (21.8)   | 42 (23.9)     | 152 (24.5)    | 227 (22.9)    | *   | *   |
|                                                | [3,000 - 3,500[ | 872 (41.4)   | 63 (35.8)     | 251 (40.4)    | 389 (39.3)    |     |     |
|                                                | ≥ 3,500         | 648 (30.7)   | 57 (32.4)     | 158 (25.4)    | 287 (29.0)    |     |     |

Abbreviations: AED = antiepileptic drug; CMU- C = complementary universal health insurance for low-income people; SSRIs = selective serotonin reuptake inhibitors; LMP = last menstrual period

Figures are N (%)

<sup>a</sup> Number of 5th level ATC classes of psychiatric medications to whom mothers were exposed in the year before pregnancy

\*\*\* p <0.0001; \*\* p <0.001; \* p <0.05; NS: Not Significant

**Supplementary Table 4. Number of children, number of events, crude event rates (per 1,000), crude IRRs and adjusted HRs for the four outcomes and each of the AEDs studied - exposure limited to dispensing during pregnancy**

|                                          | Children   | Events    | Crude event rates | IRR                     | HR [95% CI]            |
|------------------------------------------|------------|-----------|-------------------|-------------------------|------------------------|
| <b>Neurodevelopmental disorders</b>      |            |           |                   |                         |                        |
| Lamotrigine                              | 2,832      | 49        | 4.9               |                         |                        |
| Carbamazepine                            | 431        | 11        | 6.9               | 1.4 [0.7 - 2.7]         | 1.1 [0.6 - 2.3]        |
| Clonazepam                               | 876        | 21        | 5.4               | 1.1 [0.7 - 1.9]         | 0.7 [0.4 - 1.3]        |
| Gabapentin                               | 273        | 3         | 3.2               | 0.7 [0.2 - 2.1]         | 0.4 [0.1 - 1.7]        |
| Levetiracetam                            | 595        | 8         | 3.9               | 0.8 [0.4 - 1.7]         | 0.7 [0.3 - 1.6]        |
| Oxcarbazepine                            | 128        | 3         | 6.4               | 1.3 [0.4 - 4.2]         | 0.9 [0.2 - 3.6]        |
| Pregabalin                               | 951        | 19        | 5.8               | 1.2 [0.7 - 2.0]         | 0.7 [0.4 - 1.3]        |
| Topiramate                               | 338        | 6         | 4.9               | 1.0 [0.4 - 2.4]         | 1.0 [0.4 - 2.4]        |
| <b>Valproic acid</b>                     | <b>911</b> | <b>49</b> | <b>14.4</b>       | <b>3.0 [2.0 - 4.4]</b>  | <b>2.8 [1.9 - 4.2]</b> |
| <b>Pervasive developmental disorders</b> |            |           |                   |                         |                        |
| Lamotrigine                              | 2,832      | 10        | 1.0               |                         |                        |
| Carbamazepine                            | 431        | 3         | 1.8               | 1.9 [0.5 - 6.8]         | 1.6 [0.4 - 6.3]        |
| Clonazepam                               | 876        | 5         | 1.3               | 1.3 [0.4 - 3.8]         | 0.8 [0.3 - 2.6]        |
| Gabapentin                               | 273        | 2         | 2.2               | 2.2 [0.5 - 10.0]        | 2.0 [0.4 - 9.3]        |
| Levetiracetam                            | 595        | 4         | 1.9               | 2.0 [0.6 - 6.2]         | 1.8 [0.5 - 6.2]        |
| Oxcarbazepine                            | 128        | 1         | 2.1               | 2.1 [0.3 - 16.6]        | 2.2 [0.3 - 16.9]       |
| Pregabalin                               | 951        | 5         | 1.5               | 1.5 [0.5 - 4.5]         | 1.5 [0.5 - 4.5]        |
| Topiramate                               | 338        | 0         | 0.0               | N/A                     | N/A                    |
| <b>Valproic acid</b>                     | <b>911</b> | <b>16</b> | <b>4.6</b>        | <b>4.7 [2.1 - 10.4]</b> | <b>4.4 [2.0 - 9.6]</b> |
| <b>Mental retardation</b>                |            |           |                   |                         |                        |
| Lamotrigine                              | 2,832      | 14        | 1.4               |                         |                        |
| Carbamazepine                            | 431        | 2         | 1.2               | 0.9 [0.2 - 3.9]         | 0.6 [0.1 - 3.5]        |
| Clonazepam                               | 876        | 3         | 0.8               | 0.6 [0.2 - 1.9]         | 0.4 [0.1 - 1.7]        |
| Gabapentin                               | 273        | 0         | 0.0               | N/A                     | N/A                    |
| Levetiracetam                            | 595        | 1         | 0.5               | 0.3 [0.0 - 2.7]         | 0.4 [0.1 - 2.8]        |
| Oxcarbazepine                            | 128        | 0         | 0.0               | N/A                     | N/A                    |
| Pregabalin                               | 951        | 4         | 1.2               | 0.9 [0.3 - 2.7]         | 0.5 [0.1 - 2.2]        |
| Topiramate                               | 338        | 1         | 0.8               | 0.6 [0.1 - 4.5]         | 0.4 [0.0 - 4.7]        |
| <b>Valproic acid</b>                     | <b>911</b> | <b>14</b> | <b>4.0</b>        | <b>2.9 [1.4 - 6.2]</b>  | <b>3.0 [1.4 - 6.3]</b> |
| <b>Visits to a speech therapist</b>      |            |           |                   |                         |                        |
| Lamotrigine                              | 2,832      | 152       | 15.1              |                         |                        |
| Carbamazepine                            | 431        | 27        | 16.9              | 1.1 [0.7 - 1.7]         | 1.0 [0.6 - 1.5]        |
| Clonazepam                               | 876        | 63        | 16.3              | 1.1 [0.8 - 1.4]         | 0.8 [0.6 - 1.1]        |
| Gabapentin                               | 273        | 9         | 9.8               | 0.6 [0.3 - 1.3]         | 0.7 [0.4 - 1.3]        |
| Levetiracetam                            | 595        | 22        | 10.7              | 0.7 [0.5 - 1.1]         | 0.7 [0.5 - 1.2]        |
| Oxcarbazepine                            | 128        | 13        | 27.9              | 1.8 [1.0 - 3.3]         | 1.7 [1.0 - 3.1]        |
| <b>Pregabalin</b>                        | <b>951</b> | <b>38</b> | <b>11.6</b>       | <b>0.8 [0.5 - 1.1]</b>  | <b>0.6 [0.4 - 0.9]</b> |

**Supplementary Table 4. Number of children, number of events, crude event rates (per 1,000), crude IRRs and adjusted HRs for the four outcomes and each of the AEDs studied - exposure limited to dispensing during pregnancy (continued)**

|                             | Children          | Events           | Crude event rates  | IRR                           | HR [95% CI]                   |
|-----------------------------|-------------------|------------------|--------------------|-------------------------------|-------------------------------|
| Topiramate                  | 338               | 25               | 20.8               | 1.4 [0.9 - 2.1]               | 1.5 [0.9 - 2.2]               |
| <b><i>Valproic acid</i></b> | <b><i>911</i></b> | <b><i>85</i></b> | <b><i>25.1</i></b> | <b><i>1.7 [1.3 - 2.2]</i></b> | <b><i>1.5 [1.1 - 1.9]</i></b> |

Abbreviations: AED = antiepileptic drug; IRR = incidence rate ratio; HR = hazard ratio; N/A = not applicable  
Lines marked in bold and italics correspond to HRs for which the 95% CI does not include 1.

For peer review only

**Supplementary Table 5. HRs for the four outcomes and each of the AEDs studied - propensity score excluding proxies for alcohol intake and smoking or gestational age and birth weight**

|                                          | HR <sup>a</sup> [95% CI]      | HR <sup>b</sup> [95% CI]      |
|------------------------------------------|-------------------------------|-------------------------------|
| <b>Neurodevelopmental disorders</b>      |                               |                               |
| Carbamazepine                            | 1.2 [0.6 - 2.2]               | 1.2 [0.6 - 2.3]               |
| Clonazepam                               | 0.7 [0.4 - 1.1]               | 0.7 [0.4 - 1.1]               |
| Gabapentin                               | 0.4 [0.1 - 1.3]               | 0.4 [0.1 - 1.4]               |
| Levetiracetam                            | 0.7 [0.3 - 1.5]               | 0.7 [0.3 - 1.5]               |
| Oxcarbazepine                            | 0.9 [0.2 - 3.3]               | 0.8 [0.2 - 3.2]               |
| Pregabalin                               | 0.6 [0.4 - 1.0]               | 0.7 [0.4 - 1.1]               |
| Topiramate                               | 0.8 [0.4 - 1.8]               | 0.8 [0.4 - 1.8]               |
| <b><i>Valproic acid</i></b>              | <b><i>2.7 [1.9 - 4.0]</i></b> | <b><i>2.7 [1.9 - 4.0]</i></b> |
| <b>Pervasive developmental disorders</b> |                               |                               |
| Carbamazepine                            | 1.3 [0.3 - 5.0]               | 1.4 [0.4 - 5.3]               |
| Clonazepam                               | 0.8 [0.3 - 2.1]               | 0.8 [0.3 - 2.1]               |
| Gabapentin                               | 1.7 [0.4 - 7.0]               | 1.5 [0.4 - 6.7]               |
| Levetiracetam                            | 1.5 [0.4 - 5.3]               | 1.7 [0.5 - 5.7]               |
| Oxcarbazepine                            | 2.1 [0.3 - 14.0]              | 2.0 [0.3 - 13.9]              |
| Pregabalin                               | 1.3 [0.5 - 3.3]               | 1.2 [0.5 - 3.1]               |
| Topiramate                               | 0.3 [0.0 - 4.8]               | 0.3 [0.0 - 4.5]               |
| <b><i>Valproic acid</i></b>              | <b><i>4.4 [2.1 - 9.2]</i></b> | <b><i>4.5 [2.1 - 9.6]</i></b> |
| <b>Mental retardation</b>                |                               |                               |
| Carbamazepine                            | 0.6 [0.1 - 2.9]               | 0.6 [0.1 - 3.0]               |
| Clonazepam                               | 0.3 [0.1 - 1.2]               | 0.3 [0.1 - 1.2]               |
| Gabapentin                               | N/A                           | N/A                           |
| Levetiracetam                            | 0.3 [0.0 - 2.5]               | 0.4 [0.0 - 2.6]               |
| Oxcarbazepine                            | N/A                           | N/A                           |
| Pregabalin                               | 0.6 [0.2 - 1.8]               | 0.6 [0.2 - 1.7]               |
| Topiramate                               | 0.5 [0.1 - 3.3]               | 0.5 [0.1 - 3.3]               |
| <b><i>Valproic acid</i></b>              | <b><i>3.0 [1.5 - 6.1]</i></b> | <b><i>3.1 [1.5 - 6.2]</i></b> |
| <b>Visits to a speech therapist</b>      |                               |                               |
| Carbamazepine                            | 0.9 [0.6 - 1.4]               | 1.0 [0.6 - 1.4]               |
| Clonazepam                               | 0.8 [0.6 - 1.0]               | 0.8 [0.6 - 1.1]               |
| Gabapentin                               | 0.7 [0.4 - 1.2]               | 0.7 [0.4 - 1.2]               |
| Levetiracetam                            | 0.7 [0.4 - 1.1]               | 0.7 [0.5 - 1.1]               |
| Oxcarbazepine                            | 1.3 [0.7 - 2.4]               | 1.3 [0.7 - 2.5]               |
| <b><i>Pregabalin</i></b>                 | <b><i>0.7 [0.5 - 0.9]</i></b> | <b><i>0.7 [0.5 - 1.0]</i></b> |
| Topiramate                               | 1.2 [0.8 - 1.8]               | 1.2 [0.8 - 1.8]               |
| <b><i>Valproic acid</i></b>              | <b><i>1.5 [1.2 - 1.9]</i></b> | <b><i>1.5 [1.2 - 1.9]</i></b> |

Abbreviations: AED = antiepileptic drug; HR = hazard ratio; N/A = not applicable

Lines marked in bold and italics correspond to HRs for which the 95% CI does not include 1.

<sup>a</sup> adjusted for all covariates except proxies for smoking and alcohol

<sup>b</sup> adjusted for all covariates except gestational age and birth weight

1  
2  
3  
4  
5  
6  
7  
8  
9  
10  
11  
12  
13  
14  
15  
16  
17  
18  
19  
20  
21  
22  
23  
24  
25  
26  
27  
28  
29  
30  
31  
32  
33  
34  
35  
36  
37  
38  
39  
40  
41  
42  
43  
44  
45  
46

**Supplementary Table 6. Baseline characteristics according to the dose of valproic acid dispensed during pregnancy - main analysis and sensitivity analysis restricted to women considered to be treated for epilepsy**

|                                                      |           | Lamotrigine -<br>all indications | Lamotrigine -<br>epilepsy | Valproic acid |                               |                               |               |                               |                               |           |                               |                               |
|------------------------------------------------------|-----------|----------------------------------|---------------------------|---------------|-------------------------------|-------------------------------|---------------|-------------------------------|-------------------------------|-----------|-------------------------------|-------------------------------|
|                                                      |           |                                  |                           | [0-700 mg]    |                               |                               | [700-1500 mg] |                               |                               | >=1500 mg |                               |                               |
|                                                      |           | N (%)                            | N (%)                     | N (%)         | Chi <sup>2</sup> <sup>a</sup> | Chi <sup>2</sup> <sup>b</sup> | N (%)         | Chi <sup>2</sup> <sup>a</sup> | Chi <sup>2</sup> <sup>b</sup> | N (%)     | Chi <sup>2</sup> <sup>a</sup> | Chi <sup>2</sup> <sup>b</sup> |
| Number of exposed pregnancies                        |           | 2,916                            | 2,108                     | 308           |                               |                               | 520           |                               |                               | 163       |                               |                               |
| Maternal age<br>at birth (years)                     | < 25      | 431 (14.8)                       | 349 (16.6)                | 38 (12.3)     |                               |                               | 83 (16.0)     |                               |                               | 16 (9.8)  |                               |                               |
|                                                      | [25 - 30[ | 927 (31.8)                       | 715 (33.9)                | 81 (26.3)     | *                             | **                            | 135 (26.0)    | **                            | ***                           | 43 (26.4) | ***                           | ***                           |
|                                                      | [30 - 35[ | 980 (33.6)                       | 679 (32.2)                | 107 (34.7)    |                               |                               | 160 (30.8)    |                               |                               | 43 (26.4) |                               |                               |
|                                                      | ≥ 35      | 578 (19.8)                       | 365 (17.3)                | 82 (26.6)     |                               |                               | 142 (27.3)    |                               |                               | 61 (37.4) |                               |                               |
| Eligibility for CMU-C                                |           | 461 (15.8)                       | 340 (16.1)                | 94 (30.5)     | ***                           | ***                           | 162 (31.2)    | ***                           | ***                           | 55 (33.7) | ***                           | ***                           |
| Hospitalization for epilepsy                         |           | N/A                              | 171 (8.1)                 | 5 (1.6)       | N/A                           | ***                           | 12 (2.3)      | N/A                           | ***                           | 5 (3.1)   | N/A                           | *                             |
| History of mental and behavioral disorders           |           | 368 (12.6)                       | 150 (7.1)                 | 28 (9.1)      | NS                            | NS                            | 49 (9.4)      | *                             | NS                            | 19 (11.7) | NS                            | *                             |
| Proxy for alcohol intake                             |           | 35 (1.2)                         | 18 (0.9)                  | 4 (1.3)       | NS                            | NS                            | 12 (2.3)      | *                             | *                             | 6 (3.7)   | *                             | **                            |
| Proxy for smoking                                    |           | 311 (10.7)                       | 204 (9.7)                 | 33 (10.7)     | NS                            | NS                            | 69 (13.3)     | NS                            | *                             | 34 (20.9) | ***                           | ***                           |
| Folic acid supplementation                           |           | 2,026 (69.5)                     | 1,537 (72.9)              | 137 (44.5)    | ***                           | ***                           | 300 (57.7)    | ***                           | ***                           | 88 (54.0) | ***                           | ***                           |
| SSRIs during pregnancy                               |           | 210 (7.2)                        | 55 (2.6)                  | 8 (2.6)       | *                             | NS                            | 15 (2.9)      | *                             | NS                            | 10 (6.1)  | NS                            | *                             |
| History of antipsychotic use                         |           | 227 (7.8)                        | 40 (1.9)                  | 16 (5.2)      | NS                            | **                            | 22 (4.2)      | *                             | *                             | 11 (6.7)  | NS                            | ***                           |
| Number of<br>psychiatric<br>medications <sup>c</sup> | 0         | 1,641 (56.3)                     | 1,286 (61.0)              | 209 (67.9)    |                               |                               | 351 (67.5)    |                               |                               | 93 (57.1) |                               |                               |
|                                                      | 1         | 669 (22.9)                       | 522 (24.8)                | 50 (16.2)     |                               |                               | 95 (18.3)     |                               |                               | 35 (21.5) |                               |                               |
|                                                      | 2         | 258 (8.8)                        | 167 (7.9)                 | 26 (8.4)      | *                             | *                             | 28 (5.4)      | ***                           | ***                           | 13 (8.0)  | NS                            | **                            |
|                                                      | 3-4       | 211 (7.2)                        | 91 (4.3)                  | 14 (4.5)      |                               |                               | 21 (4.0)      |                               |                               | 10 (6.1)  |                               |                               |
|                                                      | ≥ 5       | 137 (4.7)                        | 42 (2.0)                  | 9 (2.9)       |                               |                               | 25 (4.8)      |                               |                               | 12 (7.4)  |                               |                               |

**Supplementary Table 6. Baseline characteristics according to the dose of valproic acid dispensed during pregnancy - main analysis and sensitivity analysis restricted to women considered to be treated for epilepsy (continued)**

|                                         |                 | Lamotrigine -<br>all indications | Lamotrigine -<br>epilepsy | Valproic acid |                               |                               |               |                               |                               |            |                               |                               |
|-----------------------------------------|-----------------|----------------------------------|---------------------------|---------------|-------------------------------|-------------------------------|---------------|-------------------------------|-------------------------------|------------|-------------------------------|-------------------------------|
|                                         |                 |                                  |                           | [0-700 mg]    |                               |                               | [700-1500 mg] |                               |                               | ≥1500 mg   |                               |                               |
|                                         |                 | N (%)                            | N (%)                     | N (%)         | Chi <sup>2</sup> <sup>a</sup> | Chi <sup>2</sup> <sup>b</sup> | N (%)         | Chi <sup>2</sup> <sup>a</sup> | Chi <sup>2</sup> <sup>b</sup> | N (%)      | Chi <sup>2</sup> <sup>a</sup> | Chi <sup>2</sup> <sup>b</sup> |
| Gestational<br>age (weeks<br>after LMP) | < 32            | 11 (0.4)                         | 8 (0.4)                   | 1 (0.3)       |                               |                               | 4 (0.8)       |                               |                               | 2 (1.2)    |                               |                               |
|                                         | [32 - 35[       | 42 (1.4)                         | 32 (1.5)                  | 8 (2.6)       | NS                            | NS                            | 8 (1.5)       | NS                            | NS                            | 3 (1.8)    | NS                            | NS                            |
|                                         | [35 - 37[       | 129 (4.4)                        | 91 (4.3)                  | 13 (4.2)      |                               |                               | 23 (4.4)      |                               |                               | 9 (5.5)    |                               |                               |
|                                         | ≥ 37            | 2,734 (93.8)                     | 1,977 (93.8)              | 286 (92.9)    |                               |                               | 485 (93.3)    |                               |                               | 149 (91.4) |                               |                               |
| Gender (male)                           |                 | 1,524 (52.3)                     | 1,115 (52.9)              | 161 (52.3)    | NS                            | NS                            | 257 (49.4)    | NS                            | NS                            | 78 (47.9)  | NS                            | NS                            |
| Birth weight                            | < 2,500         | 179 (6.1)                        | 128 (6.1)                 | 21 (6.8)      | NS                            | NS                            | 48 (9.2)      |                               |                               | 19 (11.7)  |                               |                               |
|                                         | [2,500 - 3,000[ | 630 (21.6)                       | 460 (21.8)                | 71 (23.1)     |                               |                               | 119 (22.9)    | *                             | *                             | 37 (22.7)  | *                             | *                             |
|                                         | [3,000 - 3,500[ | 1,196 (41.0)                     | 872 (41.4)                | 112 (36.4)    |                               |                               | 212 (40.8)    |                               |                               | 65 (39.9)  |                               |                               |
|                                         | ≥ 3,500         | 911 (31.2)                       | 648 (30.7)                | 104 (33.8)    |                               |                               | 141 (27.1)    |                               |                               | 42 (25.8)  |                               |                               |

Abbreviations: AED = antiepileptic drug; Chi<sup>2</sup> = Chi-squared test; CMU- C = complementary universal health insurance for low-income people; SSRIs = selective serotonin reuptake inhibitors; LMP = last menstrual period; N/A = not applicable

<sup>a</sup> compared to women exposed to lamotrigine regardless of indication

<sup>b</sup> compared to women exposed to lamotrigine and considered to be treated for epilepsy

<sup>c</sup> number of 5th level ATC classes of psychiatric medications to whom mothers were exposed in the year before pregnancy

\*\*\* p <0.0001; \*\* p <0.001; \* p <0.05; NS: Not Significant

**Supplementary Figure 1. Differences in baseline covariates between children exposed to lamotrigine (reference group) and children exposed to the other AEDs studied before (grey dots) and after IPTW (black dots) - women considered to be treated for epilepsy**



Abbreviations: AED = antiepileptic drug; IPTW = inverse probability of treatment weighting; cmu-c = complementary universal health insurance; n.psy. medications = number of ATC classes of psychiatric medications

**Supplementary Figure 2. Differences in baseline covariates between children exposed to lamotrigine (reference group) and children exposed to the other AEDs studied before (grey dots) and after IPTW (black dots) - exposure limited to dispensing during pregnancy**

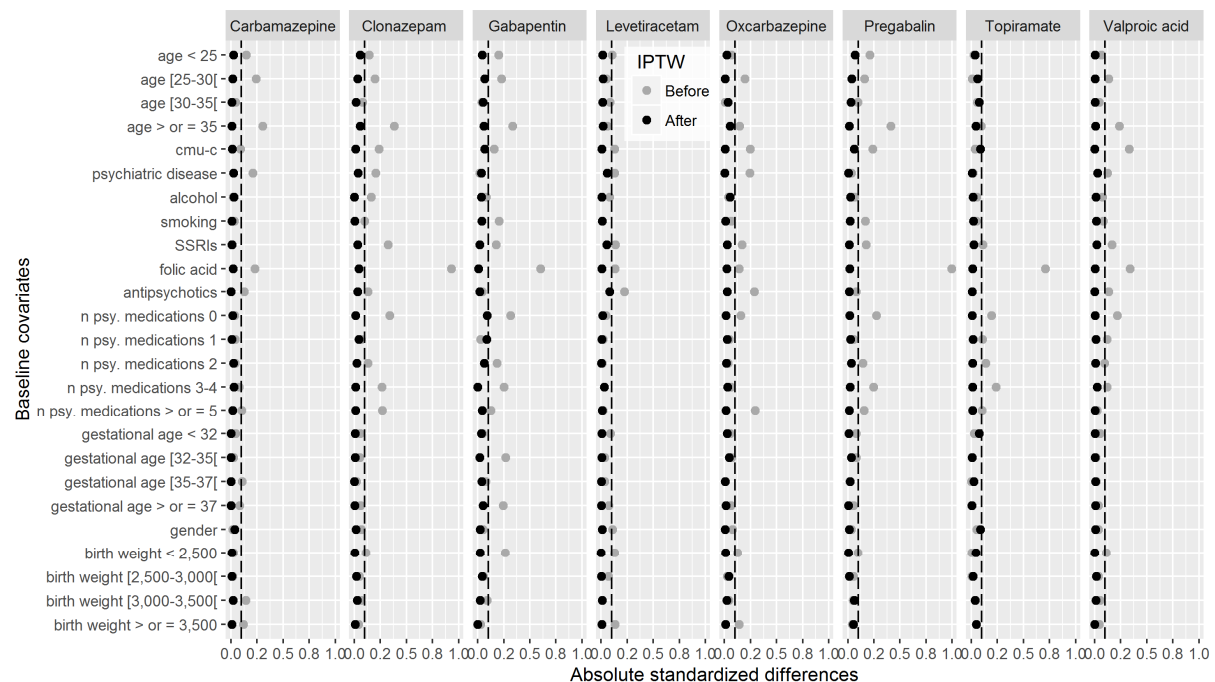

Abbreviations: AED = antiepileptic drug; IPTW = inverse probability of treatment weighting; cmu-c = complementary universal health insurance; n.psy. medications = number of ATC classes of psychiatric medications

STROBE Statement—Checklist of items that should be included in reports of *cohort studies*

|                              | Item No | Recommendation                                                                                                                                                                                                                                                                                                                                                                                                |                                                                                      |
|------------------------------|---------|---------------------------------------------------------------------------------------------------------------------------------------------------------------------------------------------------------------------------------------------------------------------------------------------------------------------------------------------------------------------------------------------------------------|--------------------------------------------------------------------------------------|
| <b>Title and abstract</b>    | 1       | (a) Indicate the study's design with a commonly used term in the title or the abstract<br>(b) Provide in the abstract an informative and balanced summary of what was done and what was found                                                                                                                                                                                                                 | p3 l1<br>p3                                                                          |
| <b>Introduction</b>          |         |                                                                                                                                                                                                                                                                                                                                                                                                               |                                                                                      |
| Background/rationale         | 2       | Explain the scientific background and rationale for the investigation being reported                                                                                                                                                                                                                                                                                                                          | p7 l14-19                                                                            |
| Objectives                   | 3       | State specific objectives, including any prespecified hypotheses                                                                                                                                                                                                                                                                                                                                              | p7 l20-23                                                                            |
| <b>Methods</b>               |         |                                                                                                                                                                                                                                                                                                                                                                                                               |                                                                                      |
| Study design                 | 4       | Present key elements of study design early in the paper                                                                                                                                                                                                                                                                                                                                                       | p8 l4-5                                                                              |
| Setting                      | 5       | Describe the setting, locations, and relevant dates, including periods of recruitment, exposure, follow-up, and data collection                                                                                                                                                                                                                                                                               | p9-11                                                                                |
| Participants                 | 6       | (a) Give the eligibility criteria, and the sources and methods of selection of participants. Describe methods of follow-up<br>(b) For matched studies, give matching criteria and number of exposed and unexposed                                                                                                                                                                                             | p8-11<br>NA                                                                          |
| Variables                    | 7       | Clearly define all outcomes, exposures, predictors, potential confounders, and effect modifiers. Give diagnostic criteria, if applicable                                                                                                                                                                                                                                                                      | p.10-11                                                                              |
| Data sources/<br>measurement | 8*      | For each variable of interest, give sources of data and details of methods of assessment (measurement). Describe comparability of assessment methods if there is more than one group                                                                                                                                                                                                                          | p10 l17-23                                                                           |
| Bias                         | 9       | Describe any efforts to address potential sources of bias                                                                                                                                                                                                                                                                                                                                                     | p12<br>p9                                                                            |
| Study size                   | 10      | Explain how the study size was arrived at                                                                                                                                                                                                                                                                                                                                                                     | p12 l7                                                                               |
| Quantitative variables       | 11      | Explain how quantitative variables were handled in the analyses. If applicable, describe which groupings were chosen and why                                                                                                                                                                                                                                                                                  | p12<br>p12 l13-17<br>NA                                                              |
| Statistical methods          | 12      | (a) Describe all statistical methods, including those used to control for confounding<br>(b) Describe any methods used to examine subgroups and interactions<br>(c) Explain how missing data were addressed<br>(d) If applicable, explain how loss to follow-up was addressed<br>(e) Describe any sensitivity analyses                                                                                        | p11 l1-3<br>p12 l13-22                                                               |
| <b>Results</b>               |         |                                                                                                                                                                                                                                                                                                                                                                                                               |                                                                                      |
| Participants                 | 13*     | (a) Report numbers of individuals at each stage of study—eg numbers potentially eligible, examined for eligibility, confirmed eligible, included in the study, completing follow-up, and analysed<br>(b) Give reasons for non-participation at each stage<br>(c) Consider use of a flow diagram                                                                                                               | p13 l3-5<br>Figure 1<br>p.33<br>Figure 1 p33<br>Figure 1 p33<br>Tables 1-2<br>p26-28 |
| Descriptive data             | 14*     | (a) Give characteristics of study participants (eg demographic, clinical, social) and information on exposures and potential confounders<br>(b) Indicate number of participants with missing data for each variable of interest<br>(c) Summarise follow-up time (eg, average and total amount)                                                                                                                | NA<br>p13 l5-6<br>Table 2 p29                                                        |
| Outcome data                 | 15*     | Report numbers of outcome events or summary measures over time                                                                                                                                                                                                                                                                                                                                                | Table 2 p29<br>p14-15                                                                |
| Main results                 | 16      | (a) Give unadjusted estimates and, if applicable, confounder-adjusted estimates and their precision (eg, 95% confidence interval). Make clear which confounders were adjusted for and why they were included<br>(b) Report category boundaries when continuous variables were categorized<br>(c) If relevant, consider translating estimates of relative risk into absolute risk for a meaningful time period | NA<br>NA                                                                             |

|                          |    |                                                                                                                                                                            |            |
|--------------------------|----|----------------------------------------------------------------------------------------------------------------------------------------------------------------------------|------------|
| Other analyses           | 17 | Report other analyses done—eg analyses of subgroups and interactions, and sensitivity analyses                                                                             | p14-15     |
| <b>Discussion</b>        |    |                                                                                                                                                                            |            |
| Key results              | 18 | Summarise key results with reference to study objectives                                                                                                                   | p15 l8-20  |
| Limitations              | 19 | Discuss limitations of the study, taking into account sources of potential bias or imprecision. Discuss both direction and magnitude of any potential bias                 | p17-19     |
| Interpretation           | 20 | Give a cautious overall interpretation of results considering objectives, limitations, multiplicity of analyses, results from similar studies, and other relevant evidence | p15-19     |
| Generalisability         | 21 | Discuss the generalisability (external validity) of the study results                                                                                                      | NA         |
| <b>Other information</b> |    |                                                                                                                                                                            |            |
| Funding                  | 22 | Give the source of funding and the role of the funders for the present study and, if applicable, for the original study on which the present article is based              | p20 l13-17 |

\*Give information separately for exposed and unexposed groups.

**Note:** An Explanation and Elaboration article discusses each checklist item and gives methodological background and published examples of transparent reporting. The STROBE checklist is best used in conjunction with this article (freely available on the Web sites of PLoS Medicine at <http://www.plosmedicine.org/>, Annals of Internal Medicine at <http://www.annals.org/>, and Epidemiology at <http://www.epidem.com/>). Information on the STROBE Initiative is available at <http://www.strobe-statement.org>.
