# Supplementary material for: Risk of early neurodevelopmental outcomes associated with prenatal exposure to the antiepileptic drugs most commonly used during pregnancy: a French nationwide population-based cohort study
Source: PubMed Central journal article supplement — BMJ Open. 2020 Jun 7;10(6):e034829. doi: 10.1136/bmjopen-2019-034829 (PMC7282331; doi:10.1136/bmjopen-2019-034829), 2020-06-07
Supplement: bmjopen-2019-034829supp001.pdf [file bmjopen-2019-034829supp001.pdf]

**Supplementary Table 1. Hospital discharge diagnoses, LTD diagnoses and ATC codes used to identify comorbidities and comedications**

|                                            | Hospital discharge diagnoses (PD, RD and AD)                                                                                                | LTD                                   | Specific drug reimbursements                                                                                                                                                                                                                                           |
|--------------------------------------------|---------------------------------------------------------------------------------------------------------------------------------------------|---------------------------------------|------------------------------------------------------------------------------------------------------------------------------------------------------------------------------------------------------------------------------------------------------------------------|
| <b>Exclusion criterion</b>                 |                                                                                                                                             |                                       |                                                                                                                                                                                                                                                                        |
| Brain malformation                         | Q00-04, Q05.0-05.4 <sup>a</sup>                                                                                                             |                                       |                                                                                                                                                                                                                                                                        |
| <b>Comorbidities</b>                       |                                                                                                                                             |                                       |                                                                                                                                                                                                                                                                        |
| History of mental and behavioral disorders | F00-99 (except F10, F17) <sup>b</sup>                                                                                                       | F00-99 (except F10, F17) <sup>c</sup> |                                                                                                                                                                                                                                                                        |
| Proxy for alcohol intake                   | E24.4, F10, G31.2, G62.1, G72.1, I42.6, K29.2, K70, K86.0, P04.3, Q86.0, R78.0, T51, X45, X65, Y15, Y57.3, Z50.2, Z71.4, Z72.1 <sup>d</sup> | F10, K70 <sup>e</sup>                 | Disulfiram, Acamprosate, Naltrexone, Nalmefene <sup>d</sup>                                                                                                                                                                                                            |
| Proxy for smoking                          | F17, I73.1, J41-44, P04.2, T65.2, Z71.6, Z72.0 <sup>d</sup>                                                                                 | F17, J41-44 <sup>e</sup>              | Nicotine replacement therapy<br>Indacaterol, olodaterol, tiotropium bromide, umeclidinium bromide, glycopyrronium bromide <sup>d</sup>                                                                                                                                 |
| <b>Indication</b>                          |                                                                                                                                             |                                       |                                                                                                                                                                                                                                                                        |
| Epilepsy                                   | G40, G41 <sup>d</sup>                                                                                                                       | G40, G41 <sup>e</sup>                 | Valproic acid as an AED, eslicarbazepine, ethosuximide, lacosamide, levetiracetam, perampanel, phenobarbital, phenytoin, retigabine, rufinamide, stiripentol, vigabatrin, zonisamide or lamotrigine, oxcarbazepine, primidone prescribed by a neurologist <sup>d</sup> |
| <b>Comedications</b>                       |                                                                                                                                             |                                       |                                                                                                                                                                                                                                                                        |
| Folic acid supplementation                 |                                                                                                                                             |                                       | Reimbursed folic acid treatments <sup>†</sup>                                                                                                                                                                                                                          |
| SSRIs                                      |                                                                                                                                             |                                       | Fluoxetine, citalopram, paroxetine, sertraline, fluvoxamine, escitalopram <sup>g</sup>                                                                                                                                                                                 |
| Antipsychotics                             |                                                                                                                                             |                                       | First- and second-generation antipsychotics <sup>b</sup>                                                                                                                                                                                                               |
| Proxy for severity of mental disorder      |                                                                                                                                             |                                       | Hypnotics, anxiolytics, antidepressants, antipsychotics <sup>b</sup>                                                                                                                                                                                                   |

Abbreviations: PD = primary diagnosis; RD = related diagnosis; AD = associated diagnosis; LTD = long-term disease; SSRIs = selective serotonin reuptake inhibitors

<sup>a</sup> during the birth stay

- <sup>b</sup> in the year before pregnancy
- <sup>c</sup> beginning before pregnancy
- <sup>d</sup> in the year before or during pregnancy
- <sup>e</sup> beginning before birth
- <sup>f</sup> between one month before pregnancy and 3 months after the start of pregnancy
- <sup>g</sup> during pregnancy

**Supplementary Table 2. Study drugs**

| Drug name                  | ATC code |
|----------------------------|----------|
| Carbamazepine              | N03AF01  |
| Clonazepam                 | N03AE01  |
| Eslicarbazepine            | N03AF04  |
| Ethosuximide               | N03AD01  |
| Gabapentin                 | N03AX12  |
| Lacosamide                 | N03AX18  |
| Lamotrigine                | N03AX09  |
| Levetiracetam              | N03AX14  |
| Oxcarbazepine              | N03AF02  |
| Perampanel                 | N03AX22  |
| Phenobarbital              | N03AA02  |
| Phenytoin                  | N03AB02  |
| Pregabalin                 | N03AX16  |
| Primidone                  | N03AA03  |
| Retigabine                 | N03AX21  |
| Rufinamide                 | N03AF03  |
| Stiripentol                | N03AX17  |
| Tiagabine                  | N03AG06  |
| Topiramate                 | N03AX11  |
| Valproic acid <sup>a</sup> | N03AG01  |
| Vigabatrin                 | N03AG04  |
| Zonisamide                 | N03AX15  |

Abbreviation: ATC code = anatomical therapeutic chemical code

<sup>a</sup>Divalproex sodium and valpromide are only indicated for the treatment of bipolar disorder in France and are therefore not considered to be AEDs.

**Supplementary Table 3. Baseline characteristics according to AED use during pregnancy - study population limited to women considered to be treated for epilepsy**

|                                                | Lamotrigine  | Carbamazepine | Levetiracetam | Valproic acid |
|------------------------------------------------|--------------|---------------|---------------|---------------|
| Number of exposed pregnancies                  | 2,108        | 176           | 621           | 991           |
| Maternal age at birth (years)                  |              |               |               |               |
| < 25                                           | 349 (16.6)   | 21 (11.9)     | 119 (19.2)    | 137 (13.8)    |
| [25 - 30[                                      | 715 (33.9)   | 42 (23.9)     | 212 (34.1)    | 259 (26.1)    |
| [30 - 35[                                      | 679 (32.2)   | 60 (34.1)     | 181 (29.1)    | 310 (31.3)    |
| ≥ 35                                           | 365 (17.3)   | 53 (30.1)     | 109 (17.6)    | 285 (28.8)    |
| Eligibility for CMU-C                          | 340 (16.1)   | 30 (17.0)     | 134 (21.6)    | 311 (31.4)    |
| Hospitalization for epilepsy                   | 171 (8.1)    | 13 (7.4)      | 43 (6.9)      | 22 (2.2)      |
| History of mental and behavioral disorders     | 150 (7.1)    | 18 (10.2)     | 51 (8.2)      | 96 (9.7)      |
| Proxy for alcohol intake                       | 18 (0.9)     | 0 (0.0)       | 13 (2.1)      | 22 (2.2)      |
| Proxy for smoking                              | 204 (9.7)    | 21 (11.9)     | 69 (11.1)     | 136 (13.7)    |
| Folic acid supplementation                     | 1,537 (72.9) | 133 (75.6)    | 396 (63.8)    | 525 (53.0)    |
| SSRIs during pregnancy                         | 55 (2.6)     | 5 (2.8)       | 23 (3.7)      | 33 (3.3)      |
| History of antipsychotic use                   | 40 (1.9)     | 4 (2.3)       | 15 (2.4)      | 49 (4.9)      |
| Number of psychiatric medications <sup>a</sup> |              |               |               |               |
| 0                                              | 1,286 (61.0) | 105 (59.7)    | 366 (58.9)    | 653 (65.9)    |
| 1                                              | 522 (24.8)   | 51 (29.0)     | 138 (22.2)    | 180 (18.2)    |
| 2                                              | 167 (7.9)    | 11 (6.3)      | 54 (8.7)      | 67 (6.8)      |
| 3-4                                            | 91 (4.3)     | 4 (2.3)       | 39 (6.3)      | 45 (4.5)      |
| ≥ 5                                            | 42 (2.0)     | 5 (2.8)       | 24 (3.9)      | 46 (4.6)      |
| Gestational age (weeks after LMP)              |              |               |               |               |
| < 32                                           | 8 (0.4)      | 2 (1.1)       | 7 (1.1)       | 7 (0.7)       |
| [32 - 35[                                      | 32 (1.5)     | 2 (1.1)       | 11 (1.8)      | 19 (1.9)      |
| [35 - 37[                                      | 91 (4.3)     | 5 (2.8)       | 33 (5.3)      | 45 (4.5)      |
| ≥ 37                                           | 1,977 (93.8) | 167 (94.9)    | 570 (91.8)    | 920 (92.8)    |
| Gender (male)                                  | 1,115 (52.9) | 96 (54.5)     | 292 (47.0)    | 496 (50.1)    |
| Birth weight                                   |              |               |               |               |
| < 2,500                                        | 128 (6.1)    | 14 (8.0)      | 60 (9.7)      | 88 (8.9)      |
| [2,500 - 3,000[                                | 460 (21.8)   | 42 (23.9)     | 152 (24.5)    | 227 (22.9)    |
| [3,000 - 3,500[                                | 872 (41.4)   | 63 (35.8)     | 251 (40.4)    | 389 (39.3)    |
| ≥ 3,500                                        | 648 (30.7)   | 57 (32.4)     | 158 (25.4)    | 287 (29.0)    |

Abbreviations: AED = antiepileptic drug; CMU- C = complementary universal health insurance for low-income people; SSRIs = selective serotonin reuptake inhibitors; LMP = last menstrual period

Figures are N (%)

<sup>a</sup> Number of 5th level ATC classes of psychiatric medications to whom mothers were exposed in the year before pregnancy

\*\*\* p <0.0001; \*\* p <0.001; \* p <0.05; NS: Not Significant

**Supplementary Table 4. Number of children, number of events, crude event rates (per 1,000), crude IRRs and adjusted HRs for the four outcomes and each of the AEDs studied - exposure limited to dispensing during pregnancy**

|                                          | Children   | Events    | Crude event rates | IRR                     | HR [95% CI]            |
|------------------------------------------|------------|-----------|-------------------|-------------------------|------------------------|
| <b>Neurodevelopmental disorders</b>      |            |           |                   |                         |                        |
| Lamotrigine                              | 2,832      | 49        | 4.9               |                         |                        |
| Carbamazepine                            | 431        | 11        | 6.9               | 1.4 [0.7 - 2.7]         | 1.1 [0.6 - 2.3]        |
| Clonazepam                               | 876        | 21        | 5.4               | 1.1 [0.7 - 1.9]         | 0.7 [0.4 - 1.3]        |
| Gabapentin                               | 273        | 3         | 3.2               | 0.7 [0.2 - 2.1]         | 0.4 [0.1 - 1.7]        |
| Levetiracetam                            | 595        | 8         | 3.9               | 0.8 [0.4 - 1.7]         | 0.7 [0.3 - 1.6]        |
| Oxcarbazepine                            | 128        | 3         | 6.4               | 1.3 [0.4 - 4.2]         | 0.9 [0.2 - 3.6]        |
| Pregabalin                               | 951        | 19        | 5.8               | 1.2 [0.7 - 2.0]         | 0.7 [0.4 - 1.3]        |
| Topiramate                               | 338        | 6         | 4.9               | 1.0 [0.4 - 2.4]         | 1.0 [0.4 - 2.4]        |
| <b>Valproic acid</b>                     | <b>911</b> | <b>49</b> | <b>14.4</b>       | <b>3.0 [2.0 - 4.4]</b>  | <b>2.8 [1.9 - 4.2]</b> |
| <b>Pervasive developmental disorders</b> |            |           |                   |                         |                        |
| Lamotrigine                              | 2,832      | 10        | 1.0               |                         |                        |
| Carbamazepine                            | 431        | 3         | 1.8               | 1.9 [0.5 - 6.8]         | 1.6 [0.4 - 6.3]        |
| Clonazepam                               | 876        | 5         | 1.3               | 1.3 [0.4 - 3.8]         | 0.8 [0.3 - 2.6]        |
| Gabapentin                               | 273        | 2         | 2.2               | 2.2 [0.5 - 10.0]        | 2.0 [0.4 - 9.3]        |
| Levetiracetam                            | 595        | 4         | 1.9               | 2.0 [0.6 - 6.2]         | 1.8 [0.5 - 6.2]        |
| Oxcarbazepine                            | 128        | 1         | 2.1               | 2.1 [0.3 - 16.6]        | 2.2 [0.3 - 16.9]       |
| Pregabalin                               | 951        | 5         | 1.5               | 1.5 [0.5 - 4.5]         | 1.5 [0.5 - 4.5]        |
| Topiramate                               | 338        | 0         | 0.0               | N/A                     | N/A                    |
| <b>Valproic acid</b>                     | <b>911</b> | <b>16</b> | <b>4.6</b>        | <b>4.7 [2.1 - 10.4]</b> | <b>4.4 [2.0 - 9.6]</b> |
| <b>Mental retardation</b>                |            |           |                   |                         |                        |
| Lamotrigine                              | 2,832      | 14        | 1.4               |                         |                        |
| Carbamazepine                            | 431        | 2         | 1.2               | 0.9 [0.2 - 3.9]         | 0.6 [0.1 - 3.5]        |
| Clonazepam                               | 876        | 3         | 0.8               | 0.6 [0.2 - 1.9]         | 0.4 [0.1 - 1.7]        |
| Gabapentin                               | 273        | 0         | 0.0               | N/A                     | N/A                    |
| Levetiracetam                            | 595        | 1         | 0.5               | 0.3 [0.0 - 2.7]         | 0.4 [0.1 - 2.8]        |
| Oxcarbazepine                            | 128        | 0         | 0.0               | N/A                     | N/A                    |
| Pregabalin                               | 951        | 4         | 1.2               | 0.9 [0.3 - 2.7]         | 0.5 [0.1 - 2.2]        |
| Topiramate                               | 338        | 1         | 0.8               | 0.6 [0.1 - 4.5]         | 0.4 [0.0 - 4.7]        |
| <b>Valproic acid</b>                     | <b>911</b> | <b>14</b> | <b>4.0</b>        | <b>2.9 [1.4 - 6.2]</b>  | <b>3.0 [1.4 - 6.3]</b> |
| <b>Visits to a speech therapist</b>      |            |           |                   |                         |                        |
| Lamotrigine                              | 2,832      | 152       | 15.1              |                         |                        |
| Carbamazepine                            | 431        | 27        | 16.9              | 1.1 [0.7 - 1.7]         | 1.0 [0.6 - 1.5]        |
| Clonazepam                               | 876        | 63        | 16.3              | 1.1 [0.8 - 1.4]         | 0.8 [0.6 - 1.1]        |
| Gabapentin                               | 273        | 9         | 9.8               | 0.6 [0.3 - 1.3]         | 0.7 [0.4 - 1.3]        |
| Levetiracetam                            | 595        | 22        | 10.7              | 0.7 [0.5 - 1.1]         | 0.7 [0.5 - 1.2]        |
| Oxcarbazepine                            | 128        | 13        | 27.9              | 1.8 [1.0 - 3.3]         | 1.7 [1.0 - 3.1]        |
| <b>Pregabalin</b>                        | <b>951</b> | <b>38</b> | <b>11.6</b>       | <b>0.8 [0.5 - 1.1]</b>  | <b>0.6 [0.4 - 0.9]</b> |

**Supplementary Table 4. Number of children, number of events, crude event rates (per 1,000), crude IRRs and adjusted HRs for the four outcomes and each of the AEDs studied - exposure limited to dispensing during pregnancy (continued)**

|                             | Children          | Events           | Crude event rates  | IRR                           | HR [95% CI]                   |
|-----------------------------|-------------------|------------------|--------------------|-------------------------------|-------------------------------|
| Topiramate                  | 338               | 25               | 20.8               | 1.4 [0.9 - 2.1]               | 1.5 [0.9 - 2.2]               |
| <b><i>Valproic acid</i></b> | <b><i>911</i></b> | <b><i>85</i></b> | <b><i>25.1</i></b> | <b><i>1.7 [1.3 - 2.2]</i></b> | <b><i>1.5 [1.1 - 1.9]</i></b> |

Abbreviations: AED = antiepileptic drug; IRR = incidence rate ratio; HR = hazard ratio; N/A = not applicable  
 Lines marked in bold and italics correspond to HRs for which the 95% CI does not include 1.

**Supplementary Table 5. HRs for the four outcomes and each of the AEDs studied - propensity score excluding proxies for alcohol intake and smoking or gestational age and birth weight**

|                                          | HR <sup>a</sup> [95% CI]      | HR <sup>b</sup> [95% CI]      |
|------------------------------------------|-------------------------------|-------------------------------|
| <b>Neurodevelopmental disorders</b>      |                               |                               |
| Carbamazepine                            | 1.2 [0.6 - 2.2]               | 1.2 [0.6 - 2.3]               |
| Clonazepam                               | 0.7 [0.4 - 1.1]               | 0.7 [0.4 - 1.1]               |
| Gabapentin                               | 0.4 [0.1 - 1.3]               | 0.4 [0.1 - 1.4]               |
| Levetiracetam                            | 0.7 [0.3 - 1.5]               | 0.7 [0.3 - 1.5]               |
| Oxcarbazepine                            | 0.9 [0.2 - 3.3]               | 0.8 [0.2 - 3.2]               |
| Pregabalin                               | 0.6 [0.4 - 1.0]               | 0.7 [0.4 - 1.1]               |
| Topiramate                               | 0.8 [0.4 - 1.8]               | 0.8 [0.4 - 1.8]               |
| <b><i>Valproic acid</i></b>              | <b><i>2.7 [1.9 - 4.0]</i></b> | <b><i>2.7 [1.9 - 4.0]</i></b> |
| <b>Pervasive developmental disorders</b> |                               |                               |
| Carbamazepine                            | 1.3 [0.3 - 5.0]               | 1.4 [0.4 - 5.3]               |
| Clonazepam                               | 0.8 [0.3 - 2.1]               | 0.8 [0.3 - 2.1]               |
| Gabapentin                               | 1.7 [0.4 - 7.0]               | 1.5 [0.4 - 6.7]               |
| Levetiracetam                            | 1.5 [0.4 - 5.3]               | 1.7 [0.5 - 5.7]               |
| Oxcarbazepine                            | 2.1 [0.3 - 14.0]              | 2.0 [0.3 - 13.9]              |
| Pregabalin                               | 1.3 [0.5 - 3.3]               | 1.2 [0.5 - 3.1]               |
| Topiramate                               | 0.3 [0.0 - 4.8]               | 0.3 [0.0 - 4.5]               |
| <b><i>Valproic acid</i></b>              | <b><i>4.4 [2.1 - 9.2]</i></b> | <b><i>4.5 [2.1 - 9.6]</i></b> |
| <b>Mental retardation</b>                |                               |                               |
| Carbamazepine                            | 0.6 [0.1 - 2.9]               | 0.6 [0.1 - 3.0]               |
| Clonazepam                               | 0.3 [0.1 - 1.2]               | 0.3 [0.1 - 1.2]               |
| Gabapentin                               | N/A                           | N/A                           |
| Levetiracetam                            | 0.3 [0.0 - 2.5]               | 0.4 [0.0 - 2.6]               |
| Oxcarbazepine                            | N/A                           | N/A                           |
| Pregabalin                               | 0.6 [0.2 - 1.8]               | 0.6 [0.2 - 1.7]               |
| Topiramate                               | 0.5 [0.1 - 3.3]               | 0.5 [0.1 - 3.3]               |
| <b><i>Valproic acid</i></b>              | <b><i>3.0 [1.5 - 6.1]</i></b> | <b><i>3.1 [1.5 - 6.2]</i></b> |
| <b>Visits to a speech therapist</b>      |                               |                               |
| Carbamazepine                            | 0.9 [0.6 - 1.4]               | 1.0 [0.6 - 1.4]               |
| Clonazepam                               | 0.8 [0.6 - 1.0]               | 0.8 [0.6 - 1.1]               |
| Gabapentin                               | 0.7 [0.4 - 1.2]               | 0.7 [0.4 - 1.2]               |
| Levetiracetam                            | 0.7 [0.4 - 1.1]               | 0.7 [0.5 - 1.1]               |
| Oxcarbazepine                            | 1.3 [0.7 - 2.4]               | 1.3 [0.7 - 2.5]               |
| <b><i>Pregabalin</i></b>                 | <b><i>0.7 [0.5 - 0.9]</i></b> | <b><i>0.7 [0.5 - 1.0]</i></b> |
| Topiramate                               | 1.2 [0.8 - 1.8]               | 1.2 [0.8 - 1.8]               |
| <b><i>Valproic acid</i></b>              | <b><i>1.5 [1.2 - 1.9]</i></b> | <b><i>1.5 [1.2 - 1.9]</i></b> |

Abbreviations: AED = antiepileptic drug; HR = hazard ratio; N/A = not applicable  
 Lines marked in bold and italics correspond to HRs for which the 95% CI does not include 1.

<sup>a</sup> adjusted for all covariates except proxies for smoking and alcohol

<sup>b</sup> adjusted for all covariates except gestational age and birth weight

**Supplementary Table 6. Baseline characteristics according to the dose of valproic acid dispensed during pregnancy - main analysis and sensitivity analysis restricted to women considered to be treated for epilepsy**

|                                                | Lamotrigine -<br>all indications | Lamotrigine -<br>epilepsy | Valproic acid |       |       |                               |                               |       |                               |                               |       |
|------------------------------------------------|----------------------------------|---------------------------|---------------|-------|-------|-------------------------------|-------------------------------|-------|-------------------------------|-------------------------------|-------|
|                                                |                                  |                           | [0-700 mg[    |       |       | [700-1500 mg[                 |                               |       | ≥1500 mg                      |                               |       |
|                                                |                                  |                           | N (%)         | N (%) | N (%) | Chi <sup>2</sup> <sup>a</sup> | Chi <sup>2</sup> <sup>b</sup> | N (%) | Chi <sup>2</sup> <sup>a</sup> | Chi <sup>2</sup> <sup>b</sup> | N (%) |
| Number of exposed pregnancies                  | 2,916                            | 2,108                     | 308           |       |       | 520                           |                               |       | 163                           |                               |       |
| < 25                                           | 431 (14.8)                       | 349 (16.6)                | 38 (12.3)     |       |       | 83 (16.0)                     |                               |       | 16 (9.8)                      |                               |       |
| Maternal age at birth (years)                  |                                  |                           |               |       |       |                               |                               |       |                               |                               |       |
| [25 - 30[                                      | 927 (31.8)                       | 715 (33.9)                | 81 (26.3)     | *     | **    | 135 (26.0)                    | **                            | ***   | 43 (26.4)                     | ***                           | ***   |
| [30 - 35[                                      | 980 (33.6)                       | 679 (32.2)                | 107 (34.7)    |       |       | 160 (30.8)                    |                               |       | 43 (26.4)                     |                               |       |
| ≥ 35                                           | 578 (19.8)                       | 365 (17.3)                | 82 (26.6)     |       |       | 142 (27.3)                    |                               |       | 61 (37.4)                     |                               |       |
| Eligibility for CMU-C                          | 461 (15.8)                       | 340 (16.1)                | 94 (30.5)     | ***   | ***   | 162 (31.2)                    | ***                           | ***   | 55 (33.7)                     | ***                           | ***   |
| Hospitalization for epilepsy                   | N/A                              | 171 (8.1)                 | 5 (1.6)       | N/A   | ***   | 12 (2.3)                      | N/A                           | ***   | 5 (3.1)                       | N/A                           | *     |
| History of mental and behavioral disorders     | 368 (12.6)                       | 150 (7.1)                 | 28 (9.1)      | NS    | NS    | 49 (9.4)                      | *                             | NS    | 19 (11.7)                     | NS                            | *     |
| Proxy for alcohol intake                       | 35 (1.2)                         | 18 (0.9)                  | 4 (1.3)       | NS    | NS    | 12 (2.3)                      | *                             | *     | 6 (3.7)                       | *                             | **    |
| Proxy for smoking                              | 311 (10.7)                       | 204 (9.7)                 | 33 (10.7)     | NS    | NS    | 69 (13.3)                     | NS                            | *     | 34 (20.9)                     | ***                           | ***   |
| Folic acid supplementation                     | 2,026 (69.5)                     | 1,537 (72.9)              | 137 (44.5)    | ***   | ***   | 300 (57.7)                    | ***                           | ***   | 88 (54.0)                     | ***                           | ***   |
| SSRIs during pregnancy                         | 210 (7.2)                        | 55 (2.6)                  | 8 (2.6)       | *     | NS    | 15 (2.9)                      | *                             | NS    | 10 (6.1)                      | NS                            | *     |
| History of antipsychotic use                   | 227 (7.8)                        | 40 (1.9)                  | 16 (5.2)      | NS    | **    | 22 (4.2)                      | *                             | *     | 11 (6.7)                      | NS                            | ***   |
| 0                                              | 1,641 (56.3)                     | 1,286 (61.0)              | 209 (67.9)    |       |       | 351 (67.5)                    |                               |       | 93 (57.1)                     |                               |       |
| Number of psychiatric medications <sup>c</sup> |                                  |                           |               |       |       |                               |                               |       |                               |                               |       |
| 1                                              | 669 (22.9)                       | 522 (24.8)                | 50 (16.2)     |       |       | 95 (18.3)                     |                               |       | 35 (21.5)                     |                               |       |
| 2                                              | 258 (8.8)                        | 167 (7.9)                 | 26 (8.4)      | *     | *     | 28 (5.4)                      | ***                           | ***   | 13 (8.0)                      | NS                            | **    |
| 3-4                                            | 211 (7.2)                        | 91 (4.3)                  | 14 (4.5)      |       |       | 21 (4.0)                      |                               |       | 10 (6.1)                      |                               |       |
| ≥ 5                                            | 137 (4.7)                        | 42 (2.0)                  | 9 (2.9)       |       |       | 25 (4.8)                      |                               |       | 12 (7.4)                      |                               |       |



**Supplementary Table 6. Baseline characteristics according to the dose of valproic acid dispensed during pregnancy - main analysis and sensitivity analysis restricted to women considered to be treated for epilepsy (continued)**

|                                         |                 | Lamotrigine -<br>all indications | Lamotrigine -<br>epilepsy | Valproic acid |       |               |                               |                               |          |                               |                               |       |
|-----------------------------------------|-----------------|----------------------------------|---------------------------|---------------|-------|---------------|-------------------------------|-------------------------------|----------|-------------------------------|-------------------------------|-------|
|                                         |                 |                                  |                           | [0-700 mg[    |       | [700-1500 mg[ |                               |                               | ≥1500 mg |                               |                               |       |
|                                         |                 |                                  |                           | N (%)         | N (%) | N (%)         | Chi <sup>2</sup> <sup>a</sup> | Chi <sup>2</sup> <sup>b</sup> | N (%)    | Chi <sup>2</sup> <sup>a</sup> | Chi <sup>2</sup> <sup>b</sup> | N (%) |
| Gestational<br>age (weeks<br>after LMP) | < 32            | 11 (0.4)                         | 8 (0.4)                   | 1 (0.3)       |       |               | 4 (0.8)                       |                               |          | 2 (1.2)                       |                               |       |
|                                         | [32 - 35[       | 42 (1.4)                         | 32 (1.5)                  | 8 (2.6)       | NS    | NS            | 8 (1.5)                       | NS                            | NS       | 3 (1.8)                       | NS                            | NS    |
|                                         | [35 - 37[       | 129 (4.4)                        | 91 (4.3)                  | 13 (4.2)      |       |               | 23 (4.4)                      |                               |          | 9 (5.5)                       |                               |       |
|                                         | ≥ 37            | 2,734 (93.8)                     | 1,977 (93.8)              | 286 (92.9)    |       |               | 485 (93.3)                    |                               |          | 149 (91.4)                    |                               |       |
| Gender (male)                           |                 | 1,524 (52.3)                     | 1,115 (52.9)              | 161 (52.3)    | NS    | NS            | 257 (49.4)                    | NS                            | NS       | 78 (47.9)                     | NS                            | NS    |
| Birth weight                            | < 2,500         | 179 (6.1)                        | 128 (6.1)                 | 21 (6.8)      |       |               | 48 (9.2)                      |                               |          | 19 (11.7)                     |                               |       |
|                                         | [2,500 - 3,000[ | 630 (21.6)                       | 460 (21.8)                | 71 (23.1)     | NS    | NS            | 119 (22.9)                    | *                             | *        | 37 (22.7)                     | *                             | *     |
|                                         | [3,000 - 3,500[ | 1,196 (41.0)                     | 872 (41.4)                | 112 (36.4)    |       |               | 212 (40.8)                    |                               |          | 65 (39.9)                     |                               |       |
|                                         | ≥ 3,500         | 911 (31.2)                       | 648 (30.7)                | 104 (33.8)    |       |               | 141 (27.1)                    |                               |          | 42 (25.8)                     |                               |       |

Abbreviations: AED = antiepileptic drug; Chi<sup>2</sup> = Chi-squared test; CMU- C = complementary universal health insurance for low-income people; SSRIs = selective serotonin reuptake inhibitors; LMP = last menstrual period; N/A = not applicable

<sup>a</sup> compared to women exposed to lamotrigine regardless of indication

<sup>b</sup> compared to women exposed to lamotrigine and considered to be treated for epilepsy

<sup>c</sup> number of 5th level ATC classes of psychiatric medications to whom mothers were exposed in the year before pregnancy

\*\*\* p <0.0001; \*\* p <0.001; \* p <0.05; NS: Not Significant

**Supplementary Figure 1. Differences in baseline covariates between children exposed to lamotrigine (reference group) and children exposed to the other AEDs studied before (grey dots) and after IPTW (black dots) - women considered to be treated for epilepsy**

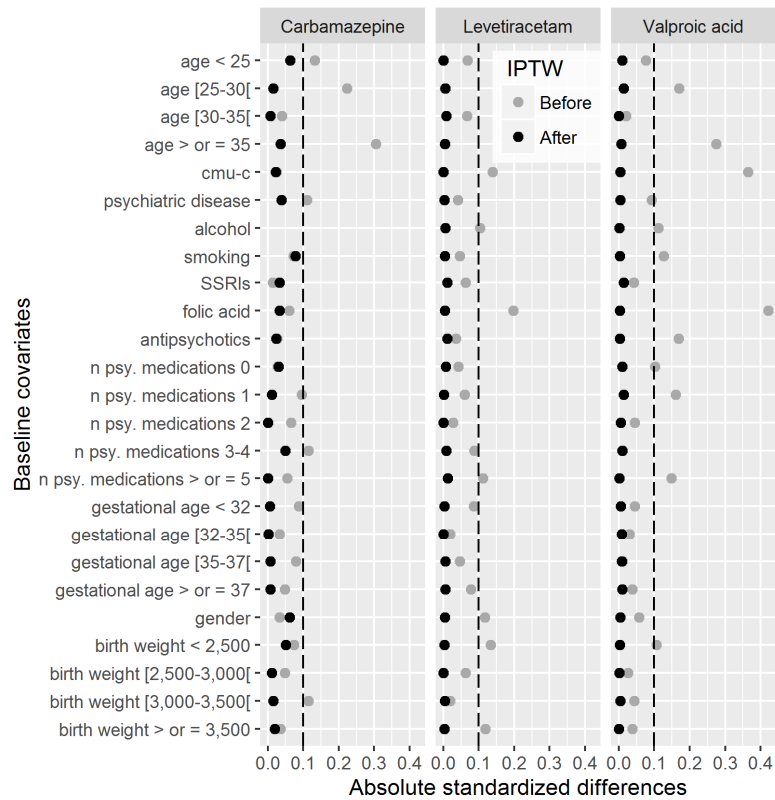

Abbreviations: AED = antiepileptic drug; IPTW = inverse probability of treatment weighting; cmu-c = complementary universal health insurance; n.psy. medications = number of ATC classes of psychiatric medications

**Supplementary Figure 2. Differences in baseline covariates between children exposed to lamotrigine (reference group) and children exposed to the other AEDs studied before (grey dots) and after IPTW (black dots) - exposure limited to dispensing during pregnancy**

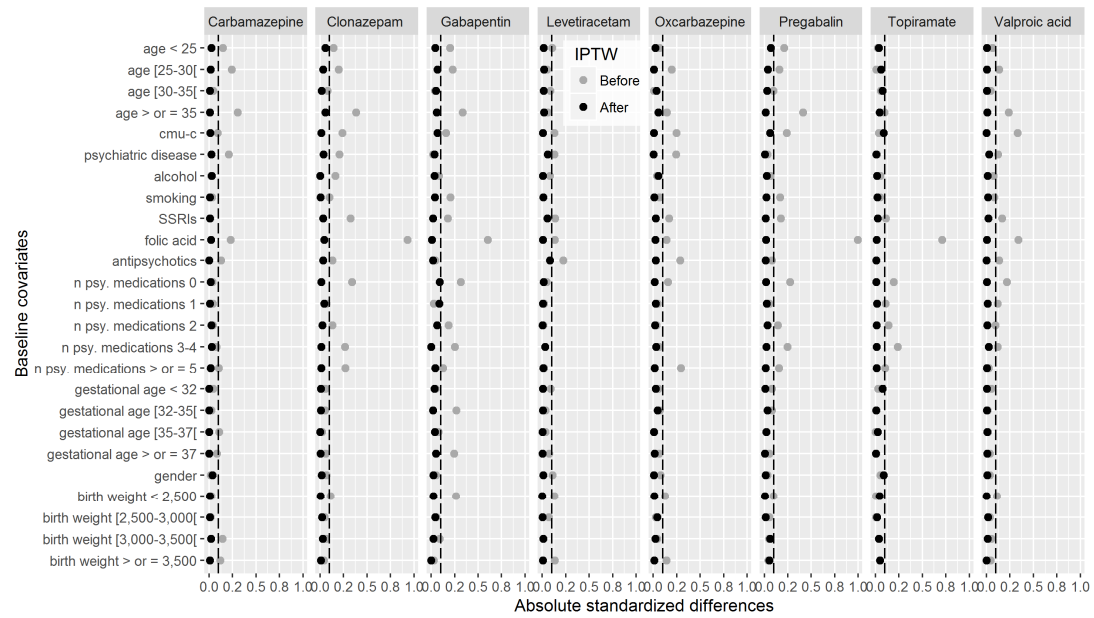

Abbreviations: AED = antiepileptic drug; IPTW = inverse probability of treatment weighting; cmu-c = complementary universal health insurance; n.psy. medications = number of ATC classes of psychiatric medications
